# Supplementary material
Source: publisher figshare collection journal article supplement (https://gsajournals.figshare.com/articles/dataset/_/12935120)
Supplement: Supplementary file 1 [file 1]

## Sheet: orthology_table
Table S2: Ortholog Table. The gene and annotation information for each species is listed in consecutive columns in the ortholog table. Each species has five columns: gene symbol, chromosome, start position, end position, and strand. The species are listed in the following order: D. melanogaster, D. simulans, D. sechellia, D. mauritiana For D. mauritiana, where there is not an annotation symbol on…
D melanogaster Gene Symbol	Chromosome	Start	End	Strand	Species\Annotation symbol	Chromosome	Start	End	Strand	Species\Annotation symbol	Chromosome	Start	End	Strand	D melanogaster Gene Symbol	Chromosome	Start	End	Strand
St3	2R	23683377	23687980	1	Dsim\GD11783	Scf_2R	20035004	20036282	1	Dsec\GM16035	scaffold_9	2850156	2851266	1	St3	Dmau_2R	17544321	17548446	+
Gp150	2R	22317662	22329416	1	Dsim\GD11658	Scf_2R	18697786	18708964	1	Dsec\GM15899	scaffold_9	1520899	1526355	1	Gp150	Dmau_2R	16220688	16226241	+
COX7AL	3R	8343669	8344310	1	Dsim\CoVIIa	Scf_3R	16796625	16797321	-1	Dsec\GM23727	scaffold_0	17659539	17659914	-1	COX7AL	Dmau_3R	16600801	16601173	+
CG2993	3R	7804665	7810014	-1	Dsim\GD19457	Scf_3R	3518766	3524288	-1	Dsec\GM10451	scaffold_6	3703366	3705936	-1	CG2993	Dmau_3R	3423234	3426947	+
CG1998	X	13409369	13413074	-1	Dsim\GD15886	Scf_X	12635142	12638694	-1	Dsec\GM11491	scaffold_21	1056030	1059065	-1	CG1998	Dmau_X	12424725	12427793	+
CG42258	X	12463528	12478431	1	Dsim\GD17080	Scf_X	11704662	11718218	1	Dsec\GM11566	scaffold_21	127599	128547	1	CG42258	Dmau_X	11515098	11527612	+
CG15203	X	11066552	11068379	1	Dsim\GD16999	Scf_X	10405444	10406995	1	Dsec\GM11451	scaffold_15	1672089	1673403	1	CG15203	Dmau_X	10230556	10231876	+
gol	2R	25072627	25084347	-1	Dsim\GD24897	Scf_2R	21379731	21391917	-1	Dsec\GM11764	scaffold_23	818267	823638	-1	gol	Dmau_2R	18884105	18889257	+
Obp50e	2R	14374462	14375385	-1	Dsim\Obp50e	Scf_2R	10971513	10972798	-1	Dsec\Obp50e	scaffold_1	7769791	7770550	-1	Obp50e	Dmau_2R	8551356	8552113	+
NaPi-T	2R	14842720	14845874	-1	Dsim\GD25654	Scf_2R	11433484	11436182	-1	Dsec\GM20177	scaffold_1	8253337	8255394	-1	NaPi-T	Dmau_2R	9007377	9009307	+
mbo	3R	12676487	12679052	-1
CG9121	2L	5047818	5051062	-1	Dsim\GD14930	Scf_2L	4861075	4864374	-1	Dsec\GM18041	scaffold_5	3134988	3137610	-1	CG9121	Dmau_2L	4829400	4831963	+
CG14052	X	2223754	2224969	1
Vps16A	3R	9267019	9270224	1	Dsim\GD18603	Scf_3R	15917082	15920356	-1	Dsec\GM23792	scaffold_0	16785790	16788762	-1
Syt4	3R	7266065	7270809	1
Su(dx)	2L	2037714	2044372	1	Dsim\GD23128	Scf_2L	1947601	1953514	1	Dsec\GM16849	scaffold_14	1986674	1989859	1	Su(dx)	Dmau_2L	1928837	1932022	+
CG31365	3R	23123962	23126422	-1	Dsim\GD18405	Scf_3R	18490045	18492512	-1	Dsec\GM23591	scaffold_0	19314256	19316300	-1	CG31365	Dmau_3R	18237126	18239170	+
SCAP	2R	6026273	6036388	-1	Dsim\GD15314	Scf_2R	2914795	2924600	-1	Dsec\GM16489	scaffold_26	559345	565409	-1	SCAP	Dmau_2R	737902	746893	+
CG10477	3L	6033199	6034611	-1	Dsim\GD13159	Scf_3L	5938956	5940068	-1	Dsec\GM13877	scaffold_2	5979386	5980263	-1	CG10477	Dmau_3L	5772657	5773534	+
eag	X	14955477	15009989	1	Dsim\GD17183	Scf_X	14010758	14064438	1	Dsec\GM12050	scaffold_32	322246	355231	1	eag	Dmau_X	13863550	13896440	+
CG1444	X	7908931	7911885	1
CG6053	3L	11697126	11699263	-1
Ser8	2R	13434207	13435045	1	Dsim\GD15412	Scf_2R	9984613	9985558	1	Dsec\GM21468	scaffold_1	6840887	6841669	1	Ser8	Dmau_2R	7648235	7649017	+
CG6142	3R	26133154	26137148	1	Dsim\GD21272	Scf_3R	21447219	21451438	1	Dsec\GM10309	scaffold_13	746310	747763	1	CG6142	Dmau_3R	21169977	21171939	+
Elba2	2L	2577687	2579179	1	Dsim\GD23161	Scf_2L	2466274	2467786	1	Dsec\GM18346	scaffold_5	746052	747197	1	Elba2	Dmau_2L	2442514	2443658	+
CG11786	3R	25046323	25047409	1	Dsim\GD21161	Scf_3R	20380008	20383916	1	Dsec\GM17790	scaffold_33	133837	134484	1	CG11786	Dmau_3R	20115233	20116213	+
lox2	2R	21789623	21791580	-1											lox2	Dmau_2R	15701085	15702848	+
Roc2	2R	11652756	11679354	-1	Dsim\GD25891	Scf_2R	8244964	8271138	-1	Dsec\GM20415	scaffold_1	5091055	5117648	-1	Roc2	Dmau_2R	5924106	5924298	+
CG16985	3L	2599297	2600242	1	Dsim\GD13695	Scf_3L	2486348	2487213	1	Dsec\GM14498	scaffold_2	2619569	2620325	1	CG16985	Dmau_3L	2462546	2463302	+
CG14818	X	1879019	1879774	-1
CG2861	X	4797231	4804862	-1	Dsim\GD27665	Scf_X	4374602	4384044	-1	Dsec\GM12663	scaffold_4	2041021	2045364	1	CG2861	Dmau_X	4295179	4301226	+
coro	2R	6862001	6872718	-1	Dsim\GD10295	Scf_2R	3615216	3626031	-1	Dsec\GM11075	scaffold_155	27041	30877	-1	coro	Dmau_2R	1359270	1363133	+
p130CAS	3L	152884	174517	1	Dsim\GD13548	Scf_3L	123419	144490	1	Dsec\GM14311	scaffold_2	180139	191802	1	p130CAS	Dmau_3L	109906	130547	+
CG13658	3R	25287474	25288930	1	Dsim\GD21206	Scf_3R	20623268	20624920	1	Dsec\GM17835	scaffold_33	370543	371936	1	CG13658	Dmau_3R	20354238	20355631	+
CG4734	2R	13297202	13298467	-1	Dsim\GD25769	Scf_2R	9852635	9853923	-1	Dsec\GM20287	scaffold_1	6707614	6708836	-1	CG4734	Dmau_2R	7516337	7517535	+
Mal-A6	2R	8465158	8467595	1	Dsim\Mal-A6	Scf_2R	5166237	5168267	1						Mal-A6	Dmau_2R	2875585	2877536	+
CG43901	X	10905767	10923436	1						Dsec\GM11442	scaffold_15	1503260	1517346	1	CG43901	Dmau_X	10074460	10101955	+
CG31960	2L	3784947	3785622	1	Dsim\GD10524	Scf_2R	4660349	4661052	1	Dsec\GM20994	scaffold_1	1474383	1474829	1	CG31960	Dmau_2L	3612111	3612557	+
ppk10	2L	10450134	10452396	-1	Dsim\GD22255	Scf_2L	10129115	10131443	-1	Dsec\GM11655	scaffold_3	5878034	5883892	-1	ppk10	Dmau_2L	10054721	10056790	+
obst-B	2L	10032690	10038954	1
CG13538	2R	23087177	23088165	1	Dsim\GD15451	Scf_2R	19451664	19452938	1	Dsec\GM15987	scaffold_9	2268436	2268966	1	CG13538	Dmau_2R	16961166	16961730	+
CG17018	2L	22308755	22368796	1	Dsim\GD24356	Scf_2L	21536399	21580608	1	Dsec\GM26675	scaffold_1783	54	3200	1	CG17018	Dmau_2L	20973338	20978148	+
CG32396	3L	6530729	6532429	1	Dsim\GD13960	Scf_3L	6397561	6399262	1	Dsec\GM14788	scaffold_2	6460817	6462257	1	CG32396	Dmau_3L	6217416	6218856	+
Men	3R	12713103	12722442	-1	Dsim\Men	Scf_3R	12610339	12619675	1	Dsec\GM25984	scaffold_0	13437451	13446204	1	Men	Dmau_3R	12435040	12443805	+
CG13999	2L	5955312	5956466	-1	Dsim\GD22623	Scf_2L	5750085	5751461	-1	Dsec\GM17986	scaffold_5	4026293	4026904	-1	CG13999	Dmau_2L	5707714	5708325	+
yellow-g	3L	2269881	2272769	-1	Dsim\GD13396	Scf_3L	2167523	2170500	-1	Dsec\GM14127	scaffold_2	2295491	2298282	-1	yellow-g	Dmau_3L	2143619	2146427	+
CG13604	3R	23988806	23992916	-1	Dsim\GD18330	Scf_3R	19351437	19355788	-1	Dsec\GM23521	scaffold_0	20156720	20160584	-1	CG13604	Dmau_3R	19079971	19083367	+
CG34126	2L	4981614	4992702	1	Dsim\GD23317	Scf_2L	4794823	4805808	1	Dsec\GM18512	scaffold_5	3070329	3074038	1	CG34126	Dmau_2L	4763032	4772614	+
icln	2R	17590964	17591881	1
Prosbeta5R1	2R	23308654	23309816	-1	Dsim\GD25066	Scf_2R	19673440	19674623	-1	Dsec\GM15565	scaffold_9	2489239	2490242	-1	Prosbeta5R1	Dmau_2R	17182168	17183171	+
Mocs1	3L	11070526	11073348	1	Dsim\GD14280	Scf_3L	10809731	10812633	1	Dsec\GM25246	scaffold_0	3291851	3293541	1	Mocs1	Dmau_3L	10588423	10590767	+
Oatp58Db	2R	22221180	22223499	-1	Dsim\GD15209	Scf_2R	18601869	18604273	-1	Dsec\GM15650	scaffold_9	1419048	1420434	-1	Oatp58Db	Dmau_2R	16119792	16122186	+
CG12393	2L	6048002	6050474	1	Dsim\GD23380	Scf_2L	5843542	5845836	1	Dsec\GM18594	scaffold_5	4119787	4121252	1	CG12393	Dmau_2L	5800917	5802366	+
CG4842	3L	16368389	16369518	1	Dsim\GD14635	Scf_3L	15975932	15977058	1	Dsec\GM25633	scaffold_0	8457750	8458717	1	CG4842	Dmau_3L	15710890	15711851	+
Eh	3R	17446642	17448858	-1	Dsim\Eh	Scf_3R	7973230	7987360	1	Dsec\Eh	scaffold_12	872341	872935	1	Eh	Dmau_3R	7827169	7827780	+
Gr59d	2R	23103941	23105169	-1	Dsim\GD15205	Scf_2R	19468598	19470337	-1	Dsec\GM17227	scaffold_7	808465	809760	1	Gr59d	Dmau_2R	16977756	16978983	+
Mesh1	3R	29201756	29202525	-1	Dsim\GD17928	Scf_3R	24385961	24386736	-1	Dsec\GM12255	scaffold_4	3890455	3891121	-1	Mesh1	Dmau_3R	24096863	24097526	+
ci	4	47710	57041	-1	Dsim\ci	Scf_4	24480	31894	-1	Dsec\GM23237	scaffold_52	14791	21609	-1	ci	Dmau_4	16983	23796	+
CG10713	3L	13428839	13435229	-1	Dsim\GD12660	Scf_3L	13124989	13131367	-1	Dsec\GM24592	scaffold_0	5597205	5598707	-1	CG10713	Dmau_3L	12873839	12875347	+
CG18173	3L	1735853	1738106	-1
CG8298	2R	11989131	11992350	1	Dsim\GD10831	Scf_2R	8580535	8582996	1	Dsec\GM21324	scaffold_1	5427357	5429376	1	CG8298	Dmau_2R	6259278	6261297	+
foi	3L	8525244	8534503	1	Dsim\GD14101	Scf_3L	8307663	8316324	1	Dsec\GM25063	scaffold_0	802759	805137	1	foi	Dmau_3L	8116655	8119038	+
kirre	X	2740384	3134532	1
CG5694	2L	10227760	10231692	-1	Dsim\GD22292	Scf_2L	9905453	9909325	-1	Dsec\GM11935	scaffold_3	5653055	5655125	-1	CG5694	Dmau_2L	9831579	9833649	+
Tim10	2R	21690215	21691139	-1
CG12376	2R	8701835	8704502	1	Dsim\GD11214	Scf_2R	13325859	13328257	1	Dsec\GM21058	scaffold_1	2233607	2235988	1	CG12376	Dmau_2R	3111331	3113697	+
GalNAc-T1	2R	15511710	15515597	1	Dsim\GD11122	Scf_2R	12063822	12067766	1	Dsec\GM21620	scaffold_1	8888990	8891924	1	GalNAc-T1	Dmau_2R	9636241	9639175	+
CG12895	2R	10436598	10437382	-1	Dsim\GD25982	Scf_2R	7092018	7092876	-1	Dsec\GM20523	scaffold_1	3936586	3937174	-1	CG12895	Dmau_2R	4781176	4781766	+
Miro	3R	24034362	24038847	-1	Dsim\GD18328	Scf_3R	19399177	19402707	-1	Dsec\GM23519	scaffold_0	20202145	20204797	-1	Miro	Dmau_3R	19125600	19128251	+
Sfp33A1	2L	11754085	11754502	-1	Dsim\GD27011	Scf_2L	11390654	11391060	-1						Sfp33A1	Dmau_2L	11304025	11304365	+
Grd	3L	17823333	17839767	1	Dsim\GD14728	Scf_3L	17396428	17412120	1	Dsec\GM25721	scaffold_0	9869062	9877701	1	Grd	Dmau_3L	17103347	17112005	+
Cpr76Bd	3L	19532743	19538289	1	Dsim\GD14810	Scf_3L	19074196	19079843	1	Dsec\GM19583	scaffold_29	228902	233285	1	Cpr76Bd	Dmau_3L	18715456	18719277	+
CG14565	3L	21743248	21744269	-1	Dsim\GD12088	Scf_3L	21154377	21155407	-1	Dsec\GM22111	scaffold_11	1658580	1659389	-1	CG14565	Dmau_3L	20776234	20777043	+
His2A:CG33859	2L	21528341	21528833	1	Dsim\GD24469	Scf_NODE_42015	2095	2436	1	Dsec\GM13169	scaffold_710	161	535	1
CG8401	2R	16028603	16030091	1	Dsim\GD11153	Scf_2R	12581440	12583260	1	Dsec\GM21653	scaffold_1	9414961	9416324	1	CG8401	Dmau_2R	10145051	10146424	+
PAN2	2R	8928169	8933103	1	Dsim\GD27922	Scf_2R	5624677	5629615	1	Dsec\GM21079	scaffold_1	2453704	2458304	1	PAN2	Dmau_2R	3331809	3336405	+
CAH1	2L	13803626	13809994	1
stas	X	17623221	17627895	-1	Dsim\GD17353	Scf_X	16618685	16623196	-1	Dsec\GM13307	scaffold_17	1360517	1364145	-1	stas	Dmau_X	16387379	16391024	+
SMC2	2R	14848621	14852653	-1
cup	2L	6663664	6674780	1	Dsim\GD23426	Scf_2L	6437332	6448359	1	Dsec\GM16204	scaffold_3	2203107	2213360	1	cup	Dmau_2L	6393172	6403320	+
Dhod	3R	8651391	8652916	-1	Dsim\GD20856	Scf_3R	16510975	16512543	1	Dsec\GM26331	scaffold_0	17375118	17376389	1	Dhod	Dmau_3R	16317124	16318395	+
Vps39	3R	18271189	18274446	-1	Dsim\GD20189	Scf_3R	7178915	7182055	1	Dsec\GM15311	scaffold_12	50390	53363	1	Vps39	Dmau_3R	7030850	7033823	+
CG3123	2L	2823546	2825506	-1	Dsim\GD18788	Scf_3R	13346007	13348358	-1	Dsec\GM18193	scaffold_5	982756	984660	-1	CG3123	Dmau_2L	2680674	2682578	+
Kr-h2	2L	6070990	6073961	1	Dsim\GD23385	Scf_2L	5866302	5869294	1	Dsec\GM18601	scaffold_5	4143317	4144323	1	Kr-h2	Dmau_2L	5824396	5825402	+
CG18675	3L	4173884	4192968	1	Dsim\GD13820	Scf_3L	4133898	4134881	1	Dsec\GM14631	scaffold_2	4166727	4167684	1	CG18675	Dmau_3L	3994307	4012573	+
raptor	X	6082634	6090201	-1	Dsim\GD16213	Scf_X	5608332	5614234	-1						raptor	Dmau_X	5503591	5508508	+
CG32170	3L	16877309	16879372	1	Dsim\GD17643	Scf_3L	16462217	16464053	1	Dsec\GM25669	scaffold_0	8941022	8942638	1	CG32170	Dmau_3L	16192024	16193602	+
CG7772	X	17906031	17907261	-1	Dsim\GD15657	Scf_X	16889458	16890676	-1	Dsec\GM22845	scaffold_8	100551	101436	-1	CG7772	Dmau_X	16655430	16656305	+
CG32551	X	18438868	18439260	1	Dsim\GD27814	Scf_X	17413249	17413759	1	Dsec\GM22900	scaffold_8	636567	637646	1	CG32551	Dmau_X	17178330	17178644	+
CG8223	3R	8747798	8754104	1	Dsim\GD18572	Scf_3R	16412074	16418787	-1	Dsec\GM23761	scaffold_0	17277367	17279062	-1	CG8223	Dmau_3R	16219230	16220936	+
Cpr49Aa	2R	12376626	12377378	1	Dsim\GD10870	Scf_2R	8969034	8969942	1	Dsec\GM21373	scaffold_1	5808521	5809715	1	Cpr49Aa	Dmau_2R	6644217	6644745	+
Npc2c	3R	10060252	10061136	1	Dsim\GD18663	Scf_3R	15162450	15166916	-1	Dsec\GM19612	scaffold_7908	1059	1572	-1	Npc2c	Dmau_3R	14970529	14971177	+
Nxt1	2R	23811321	23811974	-1
CG14661	3R	4953506	4955252	-1	Dsim\GD19644	Scf_3R	706788	708628	-1	Dsec\GM10668	scaffold_6	910031	910830	-1	CG14661	Dmau_3R	688247	689046	+
NnaD	X	13692292	13717835	1
CG31337	3R	13543966	13545400	-1	Dsim\GD20491	Scf_3R	11810041	11811326	1	Dsec\GM25927	scaffold_0	12636187	12637043	1	CG31337	Dmau_3R	11636636	11637492	+
CG31125	3R	24653371	24654820	-1	Dsim\GD18278	Scf_ICT21	7965	9553	1	Dsec\GM23471	scaffold_0	20813503	20814435	-1	CG31125	Dmau_3R	19731563	19732738	-
R	3L	1859115	1862239	-1
Taf5	2R	10877312	10879673	-1	Dsim\GD25948	Scf_2R	7504717	7507088	-1	Dsec\GM20485	scaffold_1	4350989	4353103	-1	Taf5	Dmau_2R	5191670	5193784	+
CG2126	3R	31775049	31776652	-1	Dsim\GD16272	Scf_3R	26875923	26877680	-1	Dsec\GM19642	scaffold_14062	660	928	-1	CG2126	Dmau_3R	26571029	26572309	+
CG34160	2L	10579753	10580324	1	Dsim\GD27247	Scf_2L	10262866	10263438	1						CG34160	Dmau_2L	10183394	10183592	+
CG34391	3L	5424109	5442399	1
CG33124	2L	2206525	2209102	-1	Dsim\GD22867	Scf_2L	2099400	2102355	-1	Dsec\GM18259	scaffold_5	381184	383394	-1	CG33124	Dmau_2L	2076733	2078944	+
CG5225	3R	17028693	17030701	1	Dsim\GD19130	Scf_3R	8404013	8406022	-1						CG5225	Dmau_3R	8243563	8245536	+
CG8918	X	17200726	17202598	-1	Dsim\GD15693	Scf_X	16195198	16197115	-1	Dsec\GM13333	scaffold_17	931134	932833	-1	CG8918	Dmau_X	15967362	15969064	+
CG13325	2R	13110769	13126014	1	Dsim\GD10939	Scf_2R	9682257	9685350	1	Dsec\GM21442	scaffold_1	6537634	6540183	1	CG13325	Dmau_2R	7346514	7349063	+
pre-mod(mdg4)-AD	3R	21365609	21368279	1											pre-mod(mdg4)-AD	Dmau_3R	4018720	4019043	+
mute	2R	16948296	16955266	-1	Dsim\GD25507	Scf_2R	13506424	13513212	-1	Dsec\GM20021	scaffold_1	10343352	10346011	-1	mute	Dmau_2R	11051824	11058256	+
mtTFB1	3L	11708979	11710570	1	Dsim\GD14323	Scf_3L	11409869	11411447	1	Dsec\GM25292	scaffold_0	3888337	3889744	1	mtTFB1	Dmau_3L	11183783	11184775	+
pyx	3L	217932	223069	-1	Dsim\GD13531	Scf_3L	188995	193369	-1	Dsec\GM14293	scaffold_2	246595	250412	-1	pyx	Dmau_3L	175612	179422	+
Rab9	2L	19432574	19435841	1	Dsim\GD24206	Scf_2L	18928319	18931591	1	Dsec\GM17348	scaffold_7	3048269	3050714	1	Rab9	Dmau_2L	18646169	18648594	+
CG7879	3L	1559813	1568608	-1	Dsim\GD13466	Scf_3L	1470049	1478733	-1	Dsec\GM14203	scaffold_2	1586607	1590536	-1	CG7879	Dmau_3L	1447133	1451064	+
Pop2	3L	11998398	12002915	-1	Dsim\GD12753	Scf_3L	11690724	11696299	-1	Dsec\GM24684	scaffold_0	4178014	4179397	-1	Pop2	Dmau_3L	11460168	11461304	+
CG42588	3L	12814254	12824650	1	Dsim\GD14409	Scf_3L	12509041	12519749	1	Dsec\GM25375	scaffold_0	4998907	5001936	1	CG42588	Dmau_3L	12273365	12283126	+
CG13609	3R	24227023	24228538	1	Dsim\GD21078	Scf_3R	19584498	19586464	1	Dsec\GM26574	scaffold_0	20385202	20386308	1	CG13609	Dmau_3R	19309745	19310836	+
MED4	3L	7249529	7250527	-1	Dsim\GD13079	Scf_3L	7109222	7110229	-1	Dsec\GM13780	scaffold_2	7168957	7169790	-1	MED4	Dmau_3L	6921094	6921927	+
CG17819	3R	21884728	21885550	-1	Dsim\GD18492	Scf_3R	17248153	17248961	-1	Dsec\GM23683	scaffold_0	18081950	18082684	-1	CG17819	Dmau_3R	17022160	17022894	+
Gas41	2L	6949310	6950207	-1	Dsim\GD22526	Scf_2L	6718141	6718989	-1	Dsec\GM13720	scaffold_3	2482091	2482832	-1	Gas41	Dmau_2L	6672596	6673337	+
CG13288	3L	5907381	5917540	1	Dsim\GD13911	Scf_3L	5814066	5816162	1	Dsec\GM14732	scaffold_2	5836749	5838633	1	CG13288	Dmau_3L	5643359	5645319	+
Idgf2	2L	16447330	16450508	1	Dsim\GD24057	Scf_2L	15973500	15976736	1	Dsec\GM17178	scaffold_7	93390	96537	1	Idgf2	Dmau_2L	15756066	15759220	+
CG3690	X	948585	951900	-1	Dsim\GD16444	Scf_X	743454	746346	-1	Dsec\GM19005	scaffold_10	678734	682551	-1	CG3690	Dmau_X	732414	734888	+
CG43313	X	13095571	13112462	-1	Dsim\GD24523	Scf_X	12327349	12343355	-1	Dsec\GM11517	scaffold_21	735464	740486	-1	CG43313	Dmau_X	12127083	12141577	+
Ptp10D	X	11622015	11677338	1	Dsim\Ptp10D	Scf_X	10911057	10952210	1	Dsec\GM13099	scaffold_36	217833	258192	1	Ptp10D	Dmau_X	10762150	10772649	+
CG1674	4	230730	245903	1	Dsim\GD24401	Scf_4	200525	213964	1	Dsec\GM26789	scaffold_30	8508	21671	1	CG1674	Dmau_4	183162	195903	+
CG42792	2L	15864929	15865461	-1
IntS3	2R	4235779	4242934	-1	Dsim\GD27614	Scf_2R	510176	517978	-1	Dsec\GM26749	scaffold_203	9264	16436	-1	IntS3	Dmau_2R	18128	25423	+
CG17712	2L	1750687	1752122	-1
CG31010	3R	30704762	30706121	-1	Dsim\GD16869	Scf_3R	25842711	25844013	-1	Dsec\GM12135	scaffold_4	5349823	5350617	-1	CG31010	Dmau_3R	25543527	25544311	+
CG3746	2R	22648995	22649750	-1	Dsim\GD25114	Scf_2R	19019075	19020109	-1	Dsec\GM15622	scaffold_9	1836781	1837300	-1	CG3746	Dmau_2R	16535870	16536389	+
CG8785	2R	12640690	12648224	-1	Dsim\GD25825	Scf_2R	9237067	9247212	-1	Dsec\GM20346	scaffold_1	6074860	6077925	-1	CG8785	Dmau_2R	6905362	6908414	+
CG14103	3L	19803738	19805080	-1
CG13138	2L	10299977	10302018	-1	Dsim\GD28995	Scf_2L	9977966	9980149	-1	Dsec\GM11813	scaffold_3	5725276	5727009	-1	CG13138	Dmau_2L	9904257	9905577	+
CG11594	3L	4022700	4026011	-1	Dsim\GD13301	Scf_3L	3910681	3913748	-1	Dsec\GM14022	scaffold_2	4015779	4017864	-1	CG11594	Dmau_3L	3844149	3846233	+
Vha100-4	3R	18386841	18389805	-1	Dsim\GD20171	Scf_3R	7061110	7067567	1						Vha100-4	Dmau_3R	6915527	6918302	+
CG7956	3R	21520928	21528598	1	Dsim\GD19432	Scf_3R	3956693	3964409	-1	Dsec\GM10430	scaffold_6	4136922	4143133	-1	CG7956	Dmau_3R	3859716	3866308	+
CG7565	3L	8087635	8091786	-1	Dsim\GD13023	Scf_3L	7890606	7895178	-1	Dsec\GM24974	scaffold_0	367471	371099	-1	CG7565	Dmau_3L	7698865	7702505	+
maf-S	2R	20640976	20641668	1	Dsim\GD11528	Scf_2R	17053195	17053887	1	Dsec\GM22031	scaffold_1	14082545	14083005	1	maf-S	Dmau_2R	14577496	14577956	+
deltaTry	2R	11355319	11356128	1	Dsim\GD29555	Scf_2R	7947366	7948292	-1	Dsec\GM20441	scaffold_1	4795733	4796503	-1
bnk	3R	31193362	31194389	1	Dsim\GD21562	Scf_3R	26320826	26324009	1	Dsec\GM12923	scaffold_4	5837245	5838156	1	bnk	Dmau_3R	26022495	26023391	+
CG17030	3L	4980003	4980769	-1	Dsim\GD13222	Scf_3L	4919545	4920430	-1	Dsec\GM13939	scaffold_2	4960195	4960737	-1	CG17030	Dmau_3L	4773933	4774475	+
CG30283	2R	21539584	21540573	-1	Dsim\GD25188	Scf_2R	17935809	17943492	-1	Dsec\GM15713	scaffold_9	754065	754986	-1	CG30283	Dmau_2R	15456355	15457282	+
CG12477	3L	18721893	18723272	-1	Dsim\GD12329	Scf_3L	18240645	18242024	-1	Dsec\GM14923	scaffold_19	688048	688848	-1	CG12477	Dmau_3L	17934534	17935310	+
CG10943	3L	12861717	12862920	-1	Dsim\GD17922	Scf_3L	12556210	12557342	-1
AstA-R2	3R	28737109	28744782	-1	Dsim\GD18022	Scf_3R	23942222	23949964	-1	Dsec\GM12288	scaffold_4	3444859	3451350	-1	AstA-R2	Dmau_3R	23654540	23661044	+
CG31406	3R	10348761	10350010	1	Dsim\GD18689	Scf_3R	14899521	14901164	-1	Dsec\GM23878	scaffold_0	15765948	15766833	-1	CG31406	Dmau_3R	14708648	14709518	+
sun	X	15847859	15849258	-1	Dsim\GD24676	Scf_X	14898916	14900320	-1	Dsec\GM22520	scaffold_37	318469	319658	-1	sun	Dmau_X	14706631	14707844	+
ss	3R	16374434	16403690	-1	Dsim\GD20292	Scf_3R	9019829	9050246	1	Dsec\GM15436	scaffold_12	1919961	1946217	1	ss	Dmau_3R	8860315	8886582	+
Pdk	2R	9426439	9434638	1	Dsim\GD10655	Scf_2R	6108355	6116011	1	Dsec\GM21122	scaffold_1	2936687	2946940	1	Pdk	Dmau_2R	3809874	3817075	+
Cda9	2R	17128480	17130334	1	Dsim\GD11251	Scf_2R	13685249	13687139	1	Dsec\GM21760	scaffold_1	10532151	10533566	1	Cda9	Dmau_2R	11230055	11231470	+
Phlpp	2L	19059129	19063132	1	Dsim\GD24180	Scf_2L	18576145	18580304	1	Dsec\GM17320	scaffold_7	2689489	2692840	1	Phlpp	Dmau_2L	18296035	18299386	+
l(2)not	2R	23705439	23709792	-1	Dsim\GD25022	Scf_2R	20056926	20061424	-1	Dsec\GM15518	scaffold_9	2872113	2876238	-1	l(2)not	Dmau_2R	17566365	17570502	+
CG9099	X	16885546	16886560	-1
Prosbeta5R2	2L	17990418	17991951	1	Dsim\GD24120	Scf_2L	17497888	17498955	1	Dsec\GM17255	scaffold_7	1625576	1626415	1	Prosbeta5R2	Dmau_2L	17247064	17247903	+
His1:CG33810	2L	21437011	21438033	1	Dsim\GD24323	Scf_NODE_18371	48	571	1	Dsec\GM11638	scaffold_8402	635	1399	-1
CG33934	3R	20042757	20048716	1	Dsim\GD19336	Scf_3R	5410084	5412991	-1	Dsec\GM17693	scaffold_58	73931	76178	-1	CG33934	Dmau_3R	5301158	5303502	+
opm	X	15064836	15066432	-1	Dsim\GD15824	Scf_X	14111510	14112792	-1	Dsec\GM12010	scaffold_32	406819	407611	-1	opm	Dmau_X	13948039	13948759	+
CG8331	2R	14170462	14172998	1	Dsim\GD11027	Scf_2R	10764932	10767457	1	Dsec\GM21516	scaffold_1	7565710	7567947	1	CG8331	Dmau_2R	8354865	8357087	+
Cht5	3R	13767549	13770732	1	Dsim\GD18929	Scf_3R	11582210	11585266	-1	Dsec\GM24130	scaffold_0	12411181	12414520	-1	Cht5	Dmau_3R	11411187	11413481	+
CG14695	3R	10878204	10879319	-1	Dsim\GD20693	Scf_3R	14377670	14378989	1	Dsec\GM26139	scaffold_0	15245555	15246424	1	CG14695	Dmau_3R	14188478	14189347	+
sr	3R	18090803	18135583	1	Dsim\GD19200	Scf_3R	7319264	7363500	-1	Dsec\GM15276	scaffold_12	198874	244550	-1	sr	Dmau_3R	7171851	7177548	+
janA	3R	30038622	30039533	-1	Dsim\janA	Scf_3R	25210598	25211542	-1	Dsec\janA	scaffold_4	4710736	4711259	-1	janA	Dmau_3R	24915955	24916525	+
Pdp1	3L	7811458	7867369	-1	Dsim\GD13032	Scf_3L	7638692	7690612	-1	Dsec\GM24985	scaffold_0	115893	126119	-1	Pdp1	Dmau_3L	7448093	7463384	+
CG16711	3L	9704331	9710329	1	Dsim\GD14208	Scf_3L	9455264	9460550	1	Dsec\GM25178	scaffold_0	1931658	1936179	1	CG16711	Dmau_3L	9246818	9251399	+
CG5641	3R	12427795	12429282	-1	Dsim\GD20566	Scf_3R	12859592	12861095	1	Dsec\GM26008	scaffold_0	13692322	13693635	1	CG5641	Dmau_3R	12682869	12684183	+
srpk79D	3L	22273985	22284335	1
CG1690	2R	9756293	9758068	-1	Dsim\GD10054	Scf_2R	6422230	6423365	-1						CG1690	Dmau_2R	4121289	4121755	+
Gmd	2L	4975300	4977023	-1	Dsim\GD22672	Scf_2L	4788514	4790227	-1	Dsec\GM18052	scaffold_5	3062273	3063596	-1	Gmd	Dmau_2L	4756473	4757839	+
CG33333	3R	17417467	17418042	1	Dsim\GD19158	Scf_3R	8016886	8017597	-1	Dsec\GM15232	scaffold_12	902931	903398	-1	CG33333	Dmau_3R	7857934	7858374	+
CG34179	2L	6046651	6048706	-1	Dsim\GD22603	Scf_2L	5843392	5844059	-1	Dsec\GM17965	scaffold_5	4119019	4119555	-1	CG34179	Dmau_2L	5799799	5800684	+
CR42490	2L	18665132	18667548	1
LanB2	3L	9614914	9623980	1	Dsim\LanB2	Scf_3L	9365732	9374738	1	Dsec\LanB2	scaffold_0	1844529	1850558	1
CG31274	3R	16993016	16994532	1	Dsim\GD19124	Scf_NODE_508	2373	3907	-1	Dsec\GM15193	scaffold_12	1335173	1336132	-1
Smr	X	12684203	12742618	-1	Dsim\GD15920	Scf_X	11925664	11969048	-1	Dsec\GM11537	scaffold_21	338066	341555	-1	Smr	Dmau_X	11733198	11757524	+
CG6686	2L	11984327	11988039	-1	Dsim\GD22147	Scf_2L	11616982	11620685	-1	Dsec\GM26484	scaffold_16	183940	187372	-1	CG6686	Dmau_2L	11530530	11533962	+
CG2698	3R	8001562	8006033	1	Dsim\GD19962	Scf_3R	3714589	3718950	1	Dsec\GM10992	scaffold_6	3895647	3899087	1	CG2698	Dmau_3R	3617513	3621599	+
Cpr35B	2L	14424315	14425189	-1
RpS19b	3R	23932729	23933530	-1	Dsim\GD18336	Scf_3R	19295463	19296300	-1	Dsec\GM23526	scaffold_0	20100321	20100858	-1	RpS19b	Dmau_3R	19023441	19023978	+
CG4365	3L	20798645	20800081	1
SRm160	3L	13036821	13040976	1	Dsim\GD14425	Scf_3L	12721635	12725939	1	Dsec\GM25393	scaffold_0	5202311	5205471	1	SRm160	Dmau_3L	12483477	12486465	+
CG17816	3R	7855582	7886733	-1	Dsim\GD19455	Scf_3R	3572268	3600750	-1	Dsec\GM10450	scaffold_6	3754686	3781971	-1	CG17816	Dmau_3R	3475802	3502984	+
Rpd3	3L	4626734	4629467	1
CG14977	3L	3896900	3897498	1	Dsim\GD17626	Scf_3L	3786970	3787579	1	Dsec\GM14596	scaffold_2	3890178	3890587	1	CG14977	Dmau_3L	3720144	3720693	+
CG9485	2R	21312399	21319569	1	Dsim\GD11587	Scf_2R	17709600	17716536	1	Dsec\GM15830	scaffold_9	534668	538252	1	CG9485	Dmau_2R	15232006	15237972	+
Chd3	3L	19447173	19450238	1	Dsim\Chd3	Scf_3L	18993990	18996979	1	Dsec\Chd3	scaffold_29	141940	144588	1	Chd3	Dmau_3L	18638918	18641599	+
Pka-C2	3R	30695537	30697138	-1	Dsim\GD16880	Scf_3R	25833392	25835093	-1	Dsec\GM12137	scaffold_4	5340318	5341620	-1	Pka-C2	Dmau_3R	25534046	25535359	+
CG17996	2L	16730458	16731039	-1	Dsim\GD21901	Scf_2L	16258251	16258843	-1	Dsec\GM17163	scaffold_7	377471	377880	-1	CG17996	Dmau_2L	16031249	16031658	+
Acox57D-p	2R	21386309	21389276	1	Dsim\GD11593	Scf_2R	17783529	17786526	1	Dsec\GM15834	scaffold_9	605451	607923	1	Acox57D-p	Dmau_2R	15305377	15307812	+
CG9922	3R	14035018	14036398	-1	Dsim\GD20462	Scf_3R	11322851	11324245	1	Dsec\GM25892	scaffold_0	12153326	12154123	1	CG9922	Dmau_3R	11152225	11153005	+
CG12321	3R	18187805	18188707	-1	Dsim\GD20199	Scf_3R	7263889	7264934	1	Dsec\GM15323	scaffold_12	137657	138400	1	CG12321	Dmau_3R	7116363	7117106	+
CG8281	3L	7912463	7913763	1	Dsim\GD14040	Scf_3L	7732104	7733580	1	Dsec\GM25005	scaffold_0	209080	210126	1	CG8281	Dmau_3L	7540896	7541942	+
grass	3R	27157948	27159781	1	Dsim\GD15186	Scf_3R	22425369	22427265	1	Dsec\GM10373	scaffold_13	1738749	1740400	1	grass	Dmau_3R	22143128	22144767	+
CG8642	2R	8611379	8614155	-1	Dsim\GD10152	Scf_2R	5309863	5312602	-1	Dsec\GM20674	scaffold_1	2141161	2145241	-1	CG8642	Dmau_2R	3020895	3023123	+
roq	3L	16370938	16378566	-1	Dsim\GD12476	Scf_3L	15981707	15986167	-1	Dsec\GM24408	scaffold_0	8462405	8465126	-1	roq	Dmau_3L	15716944	15719644	+
Osi12	3R	6278531	6282495	1	Dsim\GD19852	Scf_3R	2004130	2008281	1	Dsec\GM10872	scaffold_6	2190289	2193333	1	Osi12	Dmau_3R	1948269	1951275	+
Coq2	3R	8314784	8316543	-1	Dsim\GD15120	Scf_3R	16824375	16826001	1	Dsec\GM26350	scaffold_0	17687342	17688501	1	Coq2	Dmau_3R	16628732	16629968	+
Ip259	2L	10408352	10409610	1	Dsim\GD23695	Scf_2L	10087339	10088595	1	Dsec\GM18328	scaffold_3	5836756	5837535	1	Ip259	Dmau_2L	10013283	10014062	+
CG15343	X	8272324	8273806	-1	Dsim\GD16121	Scf_X	7726185	7728292	-1	Dsec\GM21452	scaffold_35	18124	18828	-1	CG15343	Dmau_X	7574361	7575065	+
Obp47a	2R	10909923	10910485	1	Dsim\Obp47a	Scf_2R	7538554	7539107	1	Dsec\Obp47a	scaffold_1	4386334	4386887	1	Obp47a	Dmau_2R	5224454	5225007	+
Pex10	3L	1558228	1559863	1	Dsim\GD13625	Scf_3L	1468222	1469883	1	Dsec\GM14421	scaffold_2	1585236	1586189	1	Pex10	Dmau_3L	1445783	1446736	+
CG14439	X	6747544	6755752	1	Dsim\GD28880	Scf_X	6233900	6241874	1	Dsec\GM12522	scaffold_4	145106	146773	-1	CG14439	Dmau_X	6117620	6119287	+
CG4723	3R	22761440	22763711	-1	Dsim\GD18422	Scf_3R	18111950	18114366	-1	Dsec\GM23612	scaffold_0	18948392	18950482	-1	CG4723	Dmau_3R	17879090	17881180	+
Nrx-IV	3L	12146519	12156990	1	Dsim\GD14363	Scf_3L	11838103	11847845	1	Dsec\GM25331	scaffold_0	4325020	4334350	1	Nrx-IV	Dmau_3L	11606062	11615420	+
CG5662	X	15210386	15211467	1	Dsim\GD17197	Scf_X	14257782	14258762	1	Dsec\GM12065	scaffold_32	551002	551709	1	CG5662	Dmau_X	14090582	14091459	+
CG10834	2L	22106862	22107304	-1	Dsim\GD21619	Scf_2L	21333567	21334079	-1	Dsec\GM16116	scaffold_28	711779	712072	-1	CG10834	Dmau_2L	20869161	20869454	+
Cht9	2R	21067992	21069286	-1	Dsim\GD25228	Scf_2R	17468272	17469596	-1	Dsec\GM15753	scaffold_9	285321	286559	-1	Cht9	Dmau_2R	14990981	14992219	+
CG6279	3L	11093371	11096245	-1
Inx2	X	6998672	7004151	1
CG1532	X	21026125	21028361	-1	Dsim\GD15515	Scf_X	19614806	19617390	-1	Dsec\GM22646	scaffold_8	3182904	3184783	-1	CG1532	Dmau_X	19541889	19543743	+
Cpr65Eb	3L	7087713	7088787	-1	Dsim\GD13091	Scf_3L	6946927	6947988	-1	Dsec\GM13790	scaffold_2	7007603	7008214	-1	Cpr65Eb	Dmau_3L	6759000	6759527	+
CG4483	3L	9235150	9236648	-1	Dsim\GD12938	Scf_3L	8999004	9000502	-1	Dsec\GM24887	scaffold_0	1485295	1486602	-1	CG4483	Dmau_3L	8801384	8802644	+
mth	3L	343378	346957	-1	Dsim\GD25478	Scf_2R	13988088	13992346	-1	Dsec\GM19982	scaffold_1	10834162	10836088	-1	mth	Dmau_3L	299962	302298	+
RanGAP	2L	19441959	19447317	1	Dsim\GD12035	Scf_2L	18940773	18943130	1	Dsec\GM17349	scaffold_7	3060649	3062733	1	RanGAP	Dmau_2L	18658521	18660590	+
Calx	3R	20978183	21015613	1	Dsim\GD19389	Scf_3R	4463757	4499953	-1	Dsec\GM15056	scaffold_38	286769	307651	-1	Calx	Dmau_3R	4359319	4380421	+
scaf6	3L	17036859	17042574	-1	Dsim\GD12428	Scf_3L	16612843	16618564	-1						scaf6	Dmau_3L	16341521	16347035	+
CG18095	2L	14029262	14031539	-1
CG34010	2L	8009603	8010652	-1											CG34010	Dmau_2L	7698499	7699604	+
CG18249	3R	8220146	8222188	1	Dsim\GD18520	Scf_3R	16920552	16922642	-1	Dsec\GM23706	scaffold_0	17782704	17784371	-1	CG18249	Dmau_3R	16723500	16725225	+
Sox15	2R	14201390	14212413	-1	Dsim\GD29008	Scf_2R	10790007	10803767	-1	Dsec\GM20225	scaffold_1	7597024	7607171	-1	Sox15	Dmau_2R	8379398	8389467	+
CG33784	3R	10067905	10068572	1	Dsim\GD18668	Scf_3R	15154229	15155097	-1	Dsec\GM23860	scaffold_0	16019195	16019868	-1	CG33784	Dmau_3R	14962933	14963606	+
Dbx	3L	1921307	1933602	1	Dsim\GD13658	Scf_3L	1830527	1842710	1	Dsec\GM14459	scaffold_2	1949858	1958895	1	Dbx	Dmau_3L	1807572	1819531	+
sesB	X	10780893	10786958	-1	Dsim\GD16013	Scf_X	10121397	10127375	-1	Dsec\GM11286	scaffold_15	1373353	1374420	-1	sesB	Dmau_X	9951373	9952565	+
ND-51L1	2R	17595267	17597409	1	Dsim\GD28801	Scf_2R	14130197	14132413	1						ND-51L1	Dmau_2R	11671056	11673161	+
Drsl3	3L	3314996	3315355	1	Dsim\dro3	Scf_3L	3211328	3211937	1	Dsec\GM14561	scaffold_2	3306857	3307072	1	Drsl3	Dmau_3L	3145273	3145488	+
mthl7	3L	8178675	8180514	-1	Dsim\GD13013	Scf_3L	7981406	7983332	-1						mthl7	Dmau_3L	7789551	7791394	+
cutlet	2L	3707230	3711748	-1	Dsim\GD22729	Scf_2L	3560260	3564752	-1	Dsec\GM18121	scaffold_5	1802887	1807126	-1	cutlet	Dmau_2L	3535805	3540040	+
Rlb1	3R	9513327	9514827	1	Dsim\Rlb1	Scf_3R	15686234	15687795	-1	Dsec\GM23810	scaffold_0	16556388	16557851	-1	Rlb1	Dmau_3R	15497124	15498587	+
vtd	3L	27136525	27157999	1	Dsim\GD22816	Scf_3L	23702261	23720642	1
Act5C	X	5900861	5905399	1	Dsim\GD16764	Scf_X	5424864	5428360	1	Dsec\GM16492	scaffold_26	547935	549065	-1
CG8492	3L	7727804	7732191	-1	Dsim\GD13037	Scf_3L	7558716	7563137	-1	Dsec\GM24992	scaffold_0	35222	39072	-1	CG8492	Dmau_3L	7367141	7371280	+
PebII	2R	25173568	25174230	-1
rin	3R	13647004	13654527	1	Dsim\GD18916	Scf_3R	11700309	11706625	-1	Dsec\GM24117	scaffold_0	12529888	12532376	-1	rin	Dmau_3R	11530227	11532774	+
Eig71Eb	3L	15649936	15650541	1	Dsim\GD12547	Scf_3L	15276032	15276786	-1	Dsec\GM24473	scaffold_0	7757033	7757655	-1	Eig71Eb	Dmau_3L	15012770	15013189	+
CG33764	3L	4266789	4267503	-1	Dsim\GD29455	Scf_3L	4228567	4229321	-1						CG33764	Dmau_3L	4087495	4088205	+
bonsai	2R	22637770	22638868	1
spi	2L	19567900	19577315	-1	Dsim\GD21745	Scf_2L	19063579	19073045	-1	Dsec\GM16998	scaffold_7	3182668	3183360	-1	spi	Dmau_2L	18781794	18782498	+
CG5267	2R	16755101	16755823	1	Dsim\GD28660	Scf_2R	13314222	13314956	1	Dsec\GM21718	scaffold_1	10148074	10148676	1	CG5267	Dmau_2R	10859845	10860381	+
CG15024	3L	4462974	4463823	-1	Dsim\GD29614	Scf_3L	4408443	4409950	-1	Dsec\GM13973	scaffold_2	4445287	4446032	-1	CG15024	Dmau_3L	4267754	4268081	+
CG30371	2R	8267643	8269334	-1	Dsim\GD15286	Scf_2R	4972960	4974676	-1	Dsec\GM20702	scaffold_1	1801624	1803242	-1	CG30371	Dmau_2R	2684464	2686082	+
CG13896	3L	710820	711850	-1	Dsim\GD13511	Scf_3L	675387	676495	-1	Dsec\GM14255	scaffold_2	730917	731546	-1	CG13896	Dmau_3L	660512	661141	+
eIF3-S8	2R	17665678	17669275	1
CG43327	2R	17032487	17034012	-1	Dsim\GD25500	Scf_2R	13590507	13591950	-1						CG43327	Dmau_2R	11136245	11136695	+
CG3338	2L	4382925	4386062	-1
Frq1	X	18155369	18174744	1	Dsim\GD24850	Scf_X	17144291	17157432	1						Frq1	Dmau_X	16910165	16918915	+
CG16978	2L	13143214	13143622	-1	Dsim\GD22087	Scf_2L	12724715	12725170	-1	Dsec\GM25866	scaffold_16	1298159	1298449	-1	CG16978	Dmau_2L	12637695	12637985	+
Pis	X	15701451	15703770	-1	Dsim\GD15785	Scf_X	14760981	14763065	-1	Dsec\GM22537	scaffold_37	179576	181180	-1	Pis	Dmau_X	14565646	14567250	+
Or42a	2R	5791441	5792967	-1	Dsim\GD10348	Scf_2R	2631684	2701749	-1	Dsec\GM16497	scaffold_26	317061	318467	-1	Or42a	Dmau_2R	515788	517215	+
CG33056	3L	21198261	21203232	-1	Dsim\GD12136	Scf_3L	20639420	20643910	-1	Dsec\GM22160	scaffold_11	1145090	1146911	-1	CG33056	Dmau_3L	20258881	20260650	+
eap	3L	12149273	12150329	1
CG13297	3L	6156592	6157377	-1	Dsim\GD13143	Scf_3L	6060222	6061343	-1	Dsec\GM13860	scaffold_2	6093737	6094332	-1	CG13297	Dmau_3L	5883935	5884538	+
SmG	X	16639810	16640419	-1
Su(z)12	3L	19918242	19923462	-1	Dsim\GD12239	Scf_3L	19385415	19408382	-1	Dsec\GM15475	scaffold_29	556728	560692	-1	Su(z)12	Dmau_3L	19039948	19043859	+
ACXC	2L	12912530	12916774	1	Dsim\GD23855	Scf_2L	12504968	12509207	1	Dsec\GM10070	scaffold_16	1078741	1082752	1	ACXC	Dmau_2L	12415223	12419332	+
mos	2R	12751483	12752936	-1
CG5687	3L	1933633	1939103	-1	Dsim\GD13424	Scf_3L	1842840	1848261	-1	Dsec\GM14155	scaffold_2	1959362	1961701	-1	CG5687	Dmau_3L	1820005	1822346	+
CG11210	2R	8098684	8102306	1	Dsim\GD10542	Scf_2R	4809210	4812881	1	Dsec\GM21007	scaffold_1	1631399	1633733	1	CG11210	Dmau_2R	2522365	2524704	+
tun	2R	15794000	15855645	1	Dsim\GD11140	Scf_2R	12407234	12412240	1	Dsec\GM21641	scaffold_1	9231313	9234973	1	tun	Dmau_2R	9972468	9976042	+
Usp47	3L	5752973	5761886	1	Dsim\GD13897	Scf_3L	5658989	5667484	1	Dsec\GM14716	scaffold_2	5686218	5691378	1	Usp47	Dmau_3L	5491880	5497039	+
Dlc90F	3R	18299229	18300044	1	Dsim\GD19225	Scf_3R	7153371	7154205	-1	Dsec\GM15301	scaffold_12	25222	25557	-1	Dlc90F	Dmau_3R	7005588	7005923	+
CG33052	3L	17427305	17428836	-1	Dsim\GD12406	Scf_3L	17016735	17018167	-1	Dsec\GM24333	scaffold_0	9473119	9474276	-1	CG33052	Dmau_3L	16719134	16720291	+
ck	2L	15044963	15057862	-1	Dsim\GD21973	Scf_2L	14557858	14570657	-1	Dsec\GM14555	scaffold_3	1307642	1315595	-1	ck	Dmau_2L	14460671	14468642	+
CG13465	3L	14943730	14944331	-1	Dsim\GD12592	Scf_3L	14578549	14579135	-1	Dsec\GM24522	scaffold_0	7055399	7055635	-1
CG4038	2R	21095958	21097305	-1	Dsim\GD25225	Scf_2R	17496158	17497524	-1	Dsec\GM15750	scaffold_9	313190	314267	-1	CG4038	Dmau_2R	15018785	15019865	+
Aph-4	3R	31048929	31052540	1
Rbp9	2L	2954762	2968434	1	Dsim\GD23195	Scf_2L	2832381	2842207	1	Dsec\GM18380	scaffold_5	1110859	1119284	1	Rbp9	Dmau_2L	2815266	2818147	+
CG9222	2L	6131023	6132484	1	Dsim\GD23390	Scf_2L	5925658	5927150	1	Dsec\GM18607	scaffold_5	4201446	4202631	1	CG9222	Dmau_2L	5882698	5883883	+
Bub1	2L	5278865	5283283	1	Dsim\GD23333	Scf_2L	5087176	5091395	1	Dsec\GM18544	scaffold_5	3358377	3361792	1	Bub1	Dmau_2L	5046836	5050252	+
ppk11	2L	9773108	9775030	-1	Dsim\GD22335	Scf_2L	9455511	9457982	-1	Dsec\GM12254	scaffold_3	5220295	5221419	-1	ppk11	Dmau_2L	9402415	9404276	+
dmrt93B	3R	21074007	21076798	1	Dsim\GD19394	Scf_3R	4400082	4403317	-1	Dsec\GM15062	scaffold_38	222718	225927	-1	dmrt93B	Dmau_3R	4295137	4298266	+
CG12012	3L	3376757	3377992	1	Dsim\GD13762	Scf_3L	3273272	3274479	1	Dsec\GM14571	scaffold_2	3369389	3369808	1	CG12012	Dmau_3L	3207042	3207461	+
ttv	2R	14526267	14587917	1	Dsim\GD11060	Scf_2R	11113585	11174754	1	Dsec\GM21554	scaffold_1	7925318	7988902	1	ttv	Dmau_2R	8714726	8746538	+
Hsc70-4	3R	15242687	15246614	1	Dsim\Hsc70-4	Scf_3R	10156793	10160572	-1	Dsec\GM24208	scaffold_0	10879783	10881738	-1	Hsc70-4	Dmau_3R	9988330	9990285	+
CG42337	3L	21183313	21193363	-1	Dsim\GD12141	Scf_3L	20623814	20634752	-1	Dsec\GM22164	scaffold_11	1131105	1133150	-1	CG42337	Dmau_3L	20244852	20249981	+
CG33757	2R	9454297	9454948	-1	Dsim\GD29230	Scf_2R	6137049	6138207	-1	Dsec\GM20600	scaffold_1	2966209	2966865	-1	CG33757	Dmau_2R	3837275	3837927	+
rictor	X	19252111	19261240	-1	Dsim\GD24462	Scf_X	18035809	18044827	-1	Dsec\GM22754	scaffold_8	1440278	1443560	-1	rictor	Dmau_X	17958976	17967299	+
CG1722	X	21249976	21251148	-1	Dsim\GD27127	Scf_X	19841388	19843013	-1	Dsec\GM22633	scaffold_8	3427512	3428360	-1	CG1722	Dmau_X	19729914	19730762	+
CG6421	2R	16872250	16872906	1
CG10428	2L	18948884	18950973	1	Dsim\GD24163	Scf_2L	18465956	18468064	1	Dsec\GM17301	scaffold_7	2578143	2580123	1	CG10428	Dmau_2L	18185994	18187938	+
Met75Cb	3L	18469378	18469618	-1
CG10749	3L	12972474	12973650	1	Dsim\GD14416	Scf_3L	12655868	12657055	1	Dsec\GM25384	scaffold_0	5137283	5138326	1	CG10749	Dmau_3L	12418492	12419534	+
HSPC300	2R	24027717	24028789	-1	Dsim\GD17870	Scf_2R	20371451	20372432	-1	Dsec\GM18284	scaffold_5	168591	169465	-1	HSPC300	Dmau_2R	17878994	17879867	+
AP-2sigma	3R	21269209	21270075	-1	Dsim\GD19995	Scf_3R	4211678	4212542	1	Dsec\GM15088	scaffold_38	33628	34166	1	AP-2sigma	Dmau_3R	4107993	4108479	+
E(spl)mdelta-HLH	3R	25997621	25998633	1	Dsim\HLHmdelta	Scf_3R	21320074	21321207	1	Dsec\GM10293	scaffold_13	611017	611538	1	E(spl)mdelta-HLH	Dmau_3R	21041627	21042148	+
CG10778	X	7931745	7933351	-1	Dsim\GD16139	Scf_X	7378329	7379716	-1	Dsec\GM11961	scaffold_50	112980	114120	-1	CG10778	Dmau_X	7247032	7248164	+
CG5322	2L	10452677	10457241	-1
Srp72	3R	20588711	20591040	1	Dsim\GD19360	Scf_3R	4890138	4892463	-1	Dsec\GM23121	scaffold_27	319742	321875	-1	Srp72	Dmau_3R	4782294	4784428	+
His2B:CG33904	2L	21438170	21438764	-1	Dsim\GD22305	Scf_NODE_42015	1449	1884	-1	Dsec\GM16910	scaffold_136	11939	12460	-1
Mer	X	19689697	19693500	-1	Dsim\GD28279	Scf_X	18465683	18468586	-1	Dsec\GM22716	scaffold_8	1863433	1865532	-1	Mer	Dmau_X	18381867	18383972	+
Der-2	3R	16482694	16484223	-1	Dsim\GD20283	Scf_3R	8939717	8941195	1	Dsec\GM15426	scaffold_12	1837768	1838691	1	Der-2	Dmau_3R	8777960	8778883	+
Mkp	3L	182522	184540	-1	Dsim\GD29287	Scf_3L	152857	154651	-1						Mkp	Dmau_3L	139541	140152	+
Ipod	X	10231002	10233080	-1	Dsim\GD24651	Scf_X	9603245	9605080	-1	Dsec\GM11331	scaffold_15	835608	836688	-1	Ipod	Dmau_X	9446174	9447204	+
CG11077	4	1028675	1029361	-1	Dsim\GD24363	Scf_4	833714	834539	-1	Dsec\GM13015	scaffold_40	90958	91464	-1	CG11077	Dmau_4	888397	888903	+
GS	X	17889547	17898603	1
Crg-1	X	3793223	3797339	1
CG12438	2L	8752285	8753209	1	Dsim\GD23561	Scf_2L	8458310	8459231	1	Dsec\GM17129	scaffold_3	4225774	4226499	1	CG12438	Dmau_2L	8406391	8407116	+
CG14459	3L	22573114	22637916	-1						Dsec\GM22090	scaffold_11	2496988	2498667	-1	CG14459	Dmau_3L	21595360	21628852	+
CG13970	2L	20103386	20104150	-1	Dsim\GD21713	Scf_2L	19555813	19557074	-1						CG13970	Dmau_2L	19271287	19271913	+
CG8569	2R	12519166	12521624	1	Dsim\GD10895	Scf_2R	9114920	9117138	1	Dsec\GM21401	scaffold_1	5953406	5955356	1	CG8569	Dmau_2R	6783677	6785629	+
Cct1	3L	1546092	1553504	1
CG42288	2R	14091031	14091814	1	Dsim\GD29577	Scf_2R	10701614	10702399	1	Dsec\GM21508	scaffold_1	7501873	7503208	1	CG42288	Dmau_2R	8291554	8292155	+
CG34109	2L	10094088	10125736	1	Dsim\GD23657	Scf_2L	9791499	9816362	1	Dsec\GM17938	scaffold_3	5539127	5560107	1	CG34109	Dmau_2L	9720455	9742014	+
CG5220	3R	17040682	17041895	1	Dsim\GD19132	Scf_3R	8392771	8393987	-1	Dsec\GM15199	scaffold_12	1288210	1289230	-1	CG5220	Dmau_3R	8232429	8233449	+
CG5160	2L	7390984	7398750	-1	Dsim\GD22497	Scf_2L	7143809	7151569	-1	Dsec\GM13567	scaffold_3	2906023	2907311	-1	CG5160	Dmau_2L	7096215	7097530	+
lva	X	3955543	3965327	-1	Dsim\GD16316	Scf_X	3545055	3554819	-1	Dsec\GM12709	scaffold_4	2858906	2867753	1	lva	Dmau_X	3499215	3508062	+
CG13978	3R	27464189	27467080	1	Dsim\GD18437	Scf_3R	18058805	18061813	-1	Dsec\GM10392	scaffold_13	2033565	2036310	1	CG13978	Dmau_3R	22438852	22441597	+
Sfp53D	2R	16744295	16745114	-1	Dsim\GD25522	Scf_2R	13303640	13304239	-1	Dsec\GM20038	scaffold_1	10137538	10138011	-1	Sfp53D	Dmau_2R	10849279	10849752	+
gom	2R	22139935	22141364	1
Pp2A-29B	2L	8366038	8370090	1	Dsim\GD23530	Scf_2L	8093090	8097135	1	Dsec\GM16909	scaffold_3	3861720	3866366	1	Pp2A-29B	Dmau_2L	8044486	8047521	+
CG14932	2L	11789919	11791011	1	Dsim\GD23789	Scf_2L	11426377	11427167	1	Dsec\GM19203	scaffold_3	7179310	7180019	1	CG14932	Dmau_2L	11339317	11340275	+
mats	3R	22421161	22423302	1	Dsim\GD20949	Scf_3R	17772442	17774601	1	Dsec\GM26432	scaffold_0	18603101	18604200	1	mats	Dmau_3R	17544239	17544941	+
CG31041	3R	29590070	29590906	-1	Dsim\GD17724	Scf_3R	24775127	24775986	-1	Dsec\GM12237	scaffold_4	4273304	4273914	-1	CG31041	Dmau_3R	24481910	24482626	+
beat-Vc	3R	12746036	12783192	-1	Dsim\GD20542	Scf_3R	12544747	12586739	1	Dsec\GM25981	scaffold_0	13385200	13416306	1	beat-Vc	Dmau_3R	12402945	12411014	+
CG34276	3R	15925629	15927577	1	Dsim\GD19057	Scf_3R	9497308	9500099	-1	Dsec\GM24269	scaffold_0	10206498	10206833	-1	CG34276	Dmau_3R	9334158	9334493	+
CG43089	3L	3714027	3714717	1	Dsim\GD29572	Scf_3L	3605227	3605989	1						CG43089	Dmau_3L	3538560	3538994	+
Dscam2	3L	7159199	7189931	-1											Dscam2	Dmau_3L	6835588	6860740	+
His1:CG33843	2L	21501633	21502655	1	Dsim\GD24323	Scf_NODE_18371	48	571	1	Dsec\GM11638	scaffold_8402	635	1399	-1
CG42492	X	5625676	5648487	-1	Dsim\GD16251	Scf_X	5157075	5177154	-1	Dsec\GM12636	scaffold_4	1226866	1233623	1	CG42492	Dmau_X	5069512	5083363	+
Art7	2R	23076688	23079038	-1	Dsim\GD25084	Scf_2R	19439755	19442149	-1	Dsec\GM15586	scaffold_9	2255714	2257910	-1	Art7	Dmau_2R	16949539	16951739	+
CG1461	X	14261223	14265379	1	Dsim\GD17166	Scf_X	13353380	13357243	1	Dsec\GM17670	scaffold_20	758383	761589	1	CG1461	Dmau_X	13214157	13217403	+
dhd	X	5312171	5313125	1	Dsim\GD29543	Scf_X	4854688	4855630	1	Dsec\dhd	scaffold_4	1545802	1546125	-1	dhd	Dmau_X	4771110	4771433	+
Muc68D	3L	11767299	11772157	-1	Dsim\GD12778	Scf_3L	11463278	11467151	-1						Muc68D	Dmau_3L	11236887	11238798	+
CG11291	2R	22211371	22212704	1	Dsim\GD11653	Scf_2R	18592019	18593327	1						CG11291	Dmau_2R	16109995	16110975	+
CG9987	2L	19430643	19432444	1
CG13667	3L	8405454	8407354	1	Dsim\GD14092	Scf_3L	8204322	8206345	1	Dsec\GM25053	scaffold_0	694702	696450	1	CG13667	Dmau_3L	8010513	8012261	+
CG6927	X	4906900	4908821	1	Dsim\GD16712	Scf_X	4475888	4477816	1	Dsec\GM12373	scaffold_4	1941541	1943170	-1	CG6927	Dmau_X	4394342	4395971	+
Orcokinin	2R	23946959	23949076	-1	Dsim\GD24991	Scf_2R	20290291	20292451	-1	Dsec\GM15489	scaffold_9	3118554	3120026	-1	Orcokinin	Dmau_2R	17798090	17799556	+
Jon25Bi	2L	4954279	4955144	-1	Dsim\GD22676	Scf_2L	4767628	4768499	-1						Jon25Bi	Dmau_2L	4735340	4736140	+
CG33469	2R	14605652	14606302	-1	Dsim\GD25672	Scf_2R	11194931	11195840	-1	Dsec\GM20201	scaffold_1	8010179	8010661	-1	CG33469	Dmau_2R	8767937	8768419	+
E(spl)mbeta-HLH	3R	26005046	26006023	-1	Dsim\HLHmbeta	Scf_3R	21327610	21328591	-1	Dsec\GM10206	scaffold_13	618574	619161	-1	E(spl)mbeta-HLH	Dmau_3R	21049179	21049766	+
CG2137	2R	7535919	7538297	1	Dsim\GD10489	Scf_2R	4269940	4272307	1	Dsec\GM20962	scaffold_1	1080552	1082561	1	CG2137	Dmau_2R	1983832	1985973	+
Trip1	2L	4966367	4967775	-1
Dic3	2R	7993798	7994968	-1	Dsim\GD10201	Scf_2R	4704704	4705903	-1	Dsec\GM20734	scaffold_1	1518632	1519674	-1	Dic3	Dmau_2R	2417594	2418612	+
CG31131	3R	27961992	27963219	-1	Dsim\GD18041	Scf_3R	23186802	23188202	-1	Dsec\GM16303	scaffold_22	410318	411481	-1
Vps24	3R	4309647	4310947	-1	Dsim\GD19689	Scf_3R	118601	119853	-1	Dsec\GM10712	scaffold_6	254435	255297	-1	Vps24	Dmau_3R	119232	120094	+
CG13022	3L	16938330	16938952	-1	Dsim\GD12435	Scf_3L	16522888	16523594	-1	Dsec\GM24358	scaffold_0	9001781	9002374	-1	CG13022	Dmau_3L	16252290	16252883	+
wit	3L	4064152	4071717	-1	Dsim\GD13298	Scf_3L	4024648	4032103	-1	Dsec\GM14019	scaffold_2	4057694	4060645	-1	wit	Dmau_3L	3885941	3888930	+
CG10332	2R	23600914	23601773	-1	Dsim\GD27739	Scf_2R	19954157	19955038	-1	Dsec\GM15525	scaffold_9	2769754	2770210	-1	CG10332	Dmau_2R	17463841	17464297	+
LysC	3L	1210485	1210971	1
CG9399	3R	9571911	9574211	-1	Dsim\GD20782	Scf_3R	15627390	15628818	1	Dsec\GM26242	scaffold_0	16497851	16498876	1	CG9399	Dmau_3R	15438477	15439512	+
ImpL2	3L	4224006	4236147	-1	Dsim\ImpL2	Scf_3L	4184016	4195626	-1	Dsec\GM13995	scaffold_2	4221611	4222665	-1	ImpL2	Dmau_3L	4044998	4045867	+
Acp76A	3L	19050757	19052026	-1	Dsim\Acp76A	Scf_3L	18563518	18564816	-1	Dsec\GM13145	scaffold_268	8826	9917	-1	Acp76A	Dmau_3L	18255717	18256952	+
mod(mdg4)	3R	21350846	21377401	-1	Dsim\GD15087	Scf_3R	4108434	4135223	1	Dsec\GM11009	scaffold_6	4287885	4292560	1	mod(mdg4)	Dmau_3R	4010340	4011259	+
nct	3R	24851601	24854869	1
CG5597	2R	23886973	23888777	1	Dsim\GD11805	Scf_2R	20237188	20238966	1	Dsec\GM16057	scaffold_9	3065464	3067093	1	CG5597	Dmau_2R	17745111	17746738	+
CG8134	X	15704125	15705806	1	Dsim\GD27996	Scf_X	14763325	14765003	1	Dsec\GM22566	scaffold_37	181718	182952	1	CG8134	Dmau_X	14567831	14569065	+
B-H1	X	17397478	17403278	1	Dsim\GD15668	Scf_X	16393715	16399521	1	Dsec\GM13509	scaffold_17	1138584	1143294	1	B-H1	Dmau_X	16162874	16167507	+
CG31111	3R	25055076	25056177	-1	Dsim\GD18240	Scf_3R	20391375	20392583	-1	Dsec\GM17759	scaffold_33	142505	143377	-1	CG31111	Dmau_3R	20123832	20124790	+
dmGlut	2L	12027438	12034122	1	Dsim\GD23809	Scf_2L	11656153	11662771	1	Dsec\GM26698	scaffold_16	204042	228667	1	dmGlut	Dmau_2L	11569690	11575389	+
CG11333	3R	31463301	31464134	1	Dsim\GD21579	Scf_3R	26575629	26576543	1	Dsec\GM12943	scaffold_4	6088782	6089515	1	CG11333	Dmau_3R	26275182	26275915	+
hd	3R	5372592	5374634	-1	Dsim\GD19621	Scf_3R	1096798	1099144	-1						hd	Dmau_3R	1080740	1082559	+
CG12920	2R	10069106	10071067	1	Dsim\GD10712	Scf_2R	6731838	6734060	1	Dsec\GM21180	scaffold_1	3569131	3570920	1	CG12920	Dmau_2R	4428476	4430294	+
CG12880	3R	27685962	27692790	1	Dsim\GD21347	Scf_3R	22940301	22943620	1	Dsec\GM16351	scaffold_22	154968	160806	1	CG12880	Dmau_3R	22650553	22656457	+
CG5177	2L	7405227	7408600	1	Dsim\GD23469	Scf_2L	7158671	7161994	1	Dsec\GM16422	scaffold_3	2920741	2923731	1	CG5177	Dmau_2L	7111113	7114175	+
CG33322	2L	20814337	20816240	-1	Dsim\GD21679	Scf_2L	20226974	20228924	-1	Dsec\GM23305	scaffold_18	725177	726938	-1	CG33322	Dmau_2L	19847005	19848766	+
CG11391	3R	19778750	19780727	1	Dsim\GD19311	Scf_3R	5677388	5679384	-1	Dsec\GM20874	scaffold_1	26188	27996	-1	CG11391	Dmau_3R	5568094	5569883	+
brv3	X	2622069	2624575	-1	Dsim\GD27606	Scf_X	2320793	2323308	-1	Dsec\GM18868	scaffold_10	2282289	2284565	-1	brv3	Dmau_X	2292452	2294728	+
Vha44	2R	16324813	16336637	-1	Dsim\GD25545	Scf_2R	12881937	12893488	-1	Dsec\GM20063	scaffold_1	9712811	9718679	-1	Vha44	Dmau_2R	10438990	10446373	+
CG10576	3L	5761963	5765702	-1	Dsim\GD13178	Scf_3L	5667945	5671699	-1	Dsec\GM13901	scaffold_2	5692405	5695364	-1	CG10576	Dmau_3L	5498062	5501104	+
wda	3R	23255070	23258087	-1	Dsim\GD18395	Scf_3R	18623342	18626090	-1	Dsec\GM23579	scaffold_0	19445889	19448384	-1	wda	Dmau_3R	18367604	18370099	+
Cyt-c-d	2L	16715891	16719635	1	Dsim\GD24072	Scf_2L	16243459	16247140	1	Dsec\GM17196	scaffold_7	365756	366073	1	Cyt-c-d	Dmau_2L	16019449	16019766	+
CG5321	X	14679568	14681418	1	Dsim\GD17176	Scf_X	13758266	13759648	1	Dsec\GM12042	scaffold_32	25993	28190	1	CG5321	Dmau_X	13596108	13597420	+
CG2982	X	4319438	4321745	1
ND-B15	2R	14756516	14757072	1	Dsim\GD11075	Scf_2R	11346895	11347478	1	Dsec\GM21569	scaffold_1	8162159	8162580	1	ND-B15	Dmau_2R	8921201	8921622	+
Phae2	2L	12111110	12112256	1	Dsim\GD23819	Scf_2L	11731234	11732376	1	Dsec\GM21910	scaffold_2089	25	678	1	Phae2	Dmau_2L	11645952	11646749	+
lok	2L	20061422	20064381	1	Dsim\GD24241	Scf_2L	19514286	19517142	1	Dsec\GM17387	scaffold_7	3672812	3674882	1	lok	Dmau_2L	19229688	19231766	+
CG10947	2L	20385293	20414800	-1	Dsim\GD21704	Scf_2L	19816076	19839597	-1	Dsec\GM23329	scaffold_18	279443	280657	-1	CG10947	Dmau_2L	19456123	19457337	+
CG4617	X	7102555	7104491	-1	Dsim\GD16162	Scf_X	6577412	6579462	-1	Dsec\GM17478	scaffold_24	217090	218465	-1	CG4617	Dmau_X	6450596	6451983	+
CG40485	X	22960609	22962360	-1	Dsim\GD23342	Scf_X	20780377	20781407	-1	Dsec\GM10055	scaffold_39	290730	291277	-1	CG40485	Dmau_X	20472021	20472874	+
Ubc6	3R	4948755	4952682	-1	Dsim\GD19645	Scf_3R	702279	705702	-1	Dsec\GM10669	scaffold_6	906291	908597	-1	Ubc6	Dmau_3R	684701	686976	+
CG4936	3R	20031823	20034330	1	Dsim\GD19334	Scf_3R	5424753	5427202	-1	Dsec\GM17691	scaffold_58	88237	90546	-1	CG4936	Dmau_3R	5315684	5317913	+
CG16995	2L	2307948	2308872	1	Dsim\GD23146	Scf_2L	2199013	2199788	1	Dsec\GM18331	scaffold_5	479062	479703	1	CG16995	Dmau_2L	2177062	2177594	+
CG13993	2L	6069079	6069838	1
CG12836	2R	7068572	7069896	1	Dsim\GD10456	Scf_2R	3805653	3807001	1	Dsec\GM20929	scaffold_1	624464	626002	1	CG12836	Dmau_2R	1546907	1548445	+
Klp64D	3L	5356864	5359392	-1	Dsim\GD13203	Scf_3L	5273193	5275625	-1	Dsec\GM13923	scaffold_2	5295837	5298082	-1	Klp64D	Dmau_3L	5107118	5109151	+
CG5377	3R	22466905	22468157	-1	Dsim\GD18455	Scf_3R	17815960	17817190	-1	Dsec\GM23646	scaffold_0	18646245	18647081	-1	CG5377	Dmau_3R	17587010	17587846	+
CG11112	2R	7400743	7401482	1	Dsim\GD10472	Scf_2R	4114036	4114892	1	Dsec\GM20948	scaffold_1	938606	939091	1	CG11112	Dmau_2R	1851782	1852457	+
Fancd2	3R	20810804	20816190	-1	Dsim\GD20034	Scf_3R	4664354	4669735	1	Dsec\GM23160	scaffold_27	94165	99417	1	Fancd2	Dmau_3R	4556286	4561515	+
CG11475	2R	22069725	22071286	-1	Dsim\GD25150	Scf_2R	18450808	18452361	-1	Dsec\GM15669	scaffold_9	1269106	1270500	-1	CG11475	Dmau_2R	15969138	15970532	+
png	X	1356488	1357601	-1	Dsim\GD16426	Scf_X	1139766	1140895	-1	Dsec\GM18979	scaffold_10	1084690	1085232	-1	png	Dmau_X	1125410	1126285	+
CG6770	2L	12045343	12046118	-1	Dsim\GD22138	Scf_2L	11674207	11674879	-1	Dsec\GM26395	scaffold_16	240877	241086	-1	CG6770	Dmau_2L	11587665	11587874	+
Su(var)2-10	2R	9116122	9122000	1	Dsim\GD10632	Scf_2R	5813158	5819090	1	Dsec\GM21096	scaffold_1	2641674	2645276	1	Su(var)2-10	Dmau_2R	3519386	3523404	+
RpL14	3L	8601006	8602392	1	Dsim\GD14108	Scf_3L	8383453	8384909	1	Dsec\GM25070	scaffold_0	872995	874271	1	RpL14	Dmau_3L	8187621	8188623	+
CG42728	3L	15527620	15528196	-1	Dsim\GD17571	Scf_3L	15154303	15154928	-1						CG42728	Dmau_3L	14895088	14895559	+
CG2187	3R	31755356	31758637	-1	Dsim\GD16315	Scf_3R	26853004	26855887	-1	Dsec\GM16418	scaffold_31	235727	238304	-1	CG2187	Dmau_3R	26551294	26553866	+
CG42693	3R	31707870	31708340	-1	Dsim\GD29473	Scf_3R	26808998	26809496	-1						CG42693	Dmau_3R	26503452	26503922	+
CG31674	2L	20831262	20832859	1	Dsim\GD24286	Scf_2L	20244312	20245883	1	Dsec\GM23376	scaffold_18	749531	750833	1	CG31674	Dmau_2L	19864900	19866203	+
CG31999	4	215009	227748	-1	Dsim\GD28811	Scf_4	184123	193268	-1						CG31999	Dmau_4	170940	179050	+
Gr8a	X	9227137	9228827	1	Dsim\GD16943	Scf_X	8654951	8656844	1	Dsec\GM22393	scaffold_68	9348	10682	1	Gr8a	Dmau_X	8489403	8490737	+
plu	2R	20262958	20263684	-1	Dsim\plu	Scf_2R	16685779	16686561	-1	Dsec\plu	scaffold_1	13716658	13717292	-1	plu	Dmau_2R	14211880	14212514	+
CG33467	2R	15055503	15056241	-1	Dsim\GD25638	Scf_2R	11629529	11630171	-1	Dsec\GM20160	scaffold_1	8452670	8453406	-1	CG33467	Dmau_2R	9204150	9204415	+
dpr5	3R	11499984	11505951	1	Dsim\GD18758	Scf_3R	13768757	13774654	-1	Dsec\GM23950	scaffold_0	14633244	14638196	-1	dpr5	Dmau_3R	13584521	13589540	+
CG6405	2L	12424904	12426440	1	Dsim\GD23836	Scf_2L	12042186	12043757	1	Dsec\GM26816	scaffold_16	615530	616812	1	CG6405	Dmau_2L	11954805	11956206	+
Atg101	X	18791668	18793517	1	Dsim\GD28388	Scf_X	17591295	17593312	1						Atg101	Dmau_X	17519432	17520088	+
CG33306	2L	13842888	13843742	-1	Dsim\GD22033	Scf_2L	13390142	13391024	-1	Dsec\GM15048	scaffold_3	109403	110186	-1	CG33306	Dmau_2L	13299818	13300607	+
Pfk	2R	10109740	10117457	1	Dsim\GD10715	Scf_2R	6773082	6780813	1	Dsec\GM21187	scaffold_1	3613007	3620047	1	Pfk	Dmau_2R	4468770	4475817	+
CG42232	3R	16458280	16469663	-1	Dsim\GD20285	Scf_3R	8954663	8966235	1	Dsec\GM15428	scaffold_12	1852268	1857228	1	CG42232	Dmau_3R	8792487	8800974	+
CG2911	3R	5622119	5624125	-1	Dsim\GD19598	Scf_3R	1343228	1345260	-1	Dsec\GM10610	scaffold_6	1562835	1563380	-1	CG2911	Dmau_3R	1325460	1326011	+
PH4alphaNE2	3R	30510083	30512214	-1	Dsim\GD16991	Scf_3R	25655993	25658128	-1	Dsec\GM12146	scaffold_4	5157852	5159605	-1	PH4alphaNE2	Dmau_3R	25356514	25358488	+
CG9920	3R	14097293	14098080	-1	Dsim\GD20460	Scf_3R	11261823	11262583	1	Dsec\GM25890	scaffold_0	12092715	12093023	1	CG9920	Dmau_3R	11090606	11090914	+
CG17928	2L	16791568	16793444	1	Dsim\GD24082	Scf_2L	16319361	16321304	1	Dsec\GM17205	scaffold_7	438389	439914	1	CG17928	Dmau_2L	16092213	16093754	+
CG3065	2R	23970305	23972233	1	Dsim\GD11817	Scf_2R	20313601	20315450	1	Dsec\GM16074	scaffold_9	3142116	3143315	1	CG3065	Dmau_2R	17821647	17822846	+
fok	2L	20079270	20085070	-1	Dsim\GD21716	Scf_2L	19531089	19537877	-1	Dsec\GM16964	scaffold_7	3695337	3697300	-1	fok	Dmau_2L	19250627	19252578	+
CG14443	X	6633959	6636169	1	Dsim\GD29077	Scf_X	6116731	6122857	1	Dsec\GM12505	scaffold_4	274471	276609	-1	CG14443	Dmau_X	5998469	5999800	+
CG6583	2L	12171204	12172586	-1	Dsim\GD22126	Scf_2L	11793758	11795025	-1	Dsec\GM26284	scaffold_16	365311	366236	-1	CG6583	Dmau_2L	11706683	11707608	+
CG1773	2R	9706267	9707580	1	Dsim\GD10675	Scf_2R	6377315	6378680	1	Dsec\GM21145	scaffold_1	3211182	3212323	1
CG6656	3R	21875293	21877788	1	Dsim\GD20904	Scf_3R	17238672	17241243	1	Dsec\GM26381	scaffold_0	18072718	18074829	1	CG6656	Dmau_3R	17012905	17015035	+
CG4788	2L	11179032	11180430	1	Dsim\GD23769	Scf_2L	10837238	10838339	1	Dsec\GM18951	scaffold_3	6580330	6581100	1	CG4788	Dmau_2L	10755503	10756273	+
Cyt-b5	2R	7533506	7535936	1	Dsim\GD10488	Scf_2R	4267503	4269953	1	Dsec\GM20961	scaffold_1	1077882	1079918	1	Cyt-b5	Dmau_2R	1981389	1983411	+
CG11562	2L	292419	293222	1	Dsim\GD23014	Scf_2L	278662	279303	1	Dsec\GM16730	scaffold_14	290337	290770	1	CG11562	Dmau_2L	276649	277082	+
CG6299	X	15462722	15466812	1	Dsim\GD24819	Scf_X	14507700	14511701	1	Dsec\GM19567	scaffold_73	49574	50422	1	CG6299	Dmau_X	14331992	14332839	+
CG42340	X	6423123	6524323	-1	Dsim\GD16192	Scf_X	5967379	5983218	-1	Dsec\GM12571	scaffold_4	412566	413850	1	CG42340	Dmau_X	5847267	5861902	+
CG11322	2L	6757864	6759628	-1	Dsim\GD26916	Scf_X	2410274	2413610	1	Dsec\GM13858	scaffold_3	2296692	2298173	-1	CG11322	Dmau_2L	6486986	6488414	+
CG34286	3R	19715186	19715927	-1	Dsim\GD20103	Scf_3R	5732511	5733191	1	Dsec\GM26896	scaffold_25	238194	238516	1	CG34286	Dmau_3R	5623443	5623765	+
mRpL43	2R	23698105	23699014	1	Dsim\GD11787	Scf_2R	20049661	20051289	1	Dsec\GM16039	scaffold_9	2864880	2865592	1	mRpL43	Dmau_2R	17559089	17559801	+
CG31459	3R	19840845	19842040	1	Dsim\GD19315	Scf_3R	5616066	5617250	-1	Dsec\GM16205	scaffold_14503	603	785	-1	CG31459	Dmau_3R	5507222	5508129	+
fws	2L	17478442	17481029	-1	Dsim\GD21865	Scf_2L	16999059	17001636	-1	Dsec\GM17124	scaffold_7	1120021	1122387	-1	fws	Dmau_2L	16752163	16754529	+
CG15719	X	13003955	13004879	-1	Dsim\GD15910	Scf_X	12236257	12237152	-1	Dsec\GM11520	scaffold_21	641993	642588	-1	CG15719	Dmau_X	12036876	12037471	+
CG4615	X	7098578	7102300	-1	Dsim\GD16164	Scf_X	6573685	6577296	-1	Dsec\GM17479	scaffold_24	213532	216310	-1	CG4615	Dmau_X	6447065	6448220	+
CG5171	2L	7401335	7404727	1	Dsim\GD23468	Scf_2L	7154899	7157995	1	Dsec\GM16411	scaffold_3	2918784	2919835	1	CG5171	Dmau_2L	7109044	7110163	+
CG13458	3L	15113557	15116373	1	Dsim\GD14524	Scf_3L	14744454	14747696	1	Dsec\GM25506	scaffold_0	7220095	7222657	1	CG13458	Dmau_3L	14487316	14489867	+
His2A:CG33850	2L	21513610	21514102	1	Dsim\GD24469	Scf_NODE_42015	2095	2436	1	Dsec\GM13169	scaffold_710	161	535	1
CG7028	3L	207184	211457	-1
Klp61F	3L	1241568	1245910	-1	Dsim\GD13489	Scf_3L	1166678	1170722	-1	Dsec\GM14227	scaffold_2	1285543	1289208	-1	Klp61F	Dmau_3L	1146102	1149785	+
CG4793	2L	15923395	15926287	1
Cad96Ca	3R	25197571	25208283	-1	Dsim\GD18227	Scf_3R	20532203	20543069	-1	Dsec\GM17743	scaffold_33	284456	293450	-1	Cad96Ca	Dmau_3R	20265749	20274783	+
CG31800	2L	19033657	19034576	-1	Dsim\GD21787	Scf_2L	18551031	18551971	-1	Dsec\GM17039	scaffold_7	2663777	2664504	-1	CG31800	Dmau_2L	18270210	18270937	+
E(spl)m7-HLH	3R	26037038	26038019	1	Dsim\HLHm7	Scf_3R	21359825	21360798	1	Dsec\GM10299	scaffold_13	657461	658021	1	E(spl)m7-HLH	Dmau_3R	21081338	21081898	+
CG9864	2R	20248130	20254670	-1	Dsim\GD25294	Scf_2R	16670921	16677341	-1	Dsec\GM19801	scaffold_1	13701938	13703925	-1	CG9864	Dmau_2R	14197268	14199228	+
stl	2R	22807860	22815993	1	Dsim\GD11705	Scf_2R	19179500	19187664	1	Dsec\GM15952	scaffold_9	2000243	2004678	1	stl	Dmau_2R	16693783	16700829	+
dan	3R	25184383	25192806	1	Dsim\GD21183	Scf_3R	20518988	20527481	1	Dsec\GM17814	scaffold_33	276242	278756	1	dan	Dmau_3R	20257678	20260029	+
mars	2R	13500621	13506011	1	Dsim\GD28914	Scf_2R	10053567	10056682	1	Dsec\GM21472	scaffold_1	6909609	6912453	1	mars	Dmau_2R	7716989	7719838	+
CG13670	3L	8320763	8322280	1	Dsim\GD14077	Scf_3L	8118712	8120228	1	Dsec\GM25041	scaffold_0	598875	600237	1	CG13670	Dmau_3L	7926566	7927931	+
CG8008	2R	9157907	9161436	-1	Dsim\GD10099	Scf_2R	5849138	5852714	-1	Dsec\GM20626	scaffold_1	2678706	2681234	-1	CG8008	Dmau_2R	3555176	3557698	+
SelG	X	11887284	11888240	1	Dsim\GD17055	Scf_X	11150042	11151007	1	Dsec\GM19653	scaffold_2776	1010	1476	1	SelG	Dmau_X	10969313	10969774	+
Baldspot	3L	16648442	16661615	-1	Dsim\GD12451	Scf_3L	16236906	16250167	-1	Dsec\GM24378	scaffold_0	8721035	8730380	-1	Baldspot	Dmau_3L	15969324	15978649	+
Ufd1-like	3L	11121966	11123216	-1	Dsim\GD12819	Scf_3L	10857704	10858983	-1	Dsec\GM24769	scaffold_0	3337567	3338576	-1	Ufd1-like	Dmau_3L	10635853	10636862	+
RpL36A	2L	8041873	8042909	-1	Dsim\GD29335	Scf_2L	7769233	7770285	-1	Dsec\GM13202	scaffold_3	3538717	3539555	-1	RpL36A	Dmau_2L	7721060	7721680	+
CG13748	2R	8940415	8941136	1	Dsim\GD10616	Scf_2R	5636934	5637649	1	Dsec\GM21081	scaffold_1	2465976	2466317	1	CG13748	Dmau_2R	3343937	3344278	+
CG7990	X	19196058	19201979	-1	Dsim\GD15597	Scf_X	17978560	17984548	-1	Dsec\GM22761	scaffold_8	1386367	1390235	-1	CG7990	Dmau_X	17904796	17908556	+
CG10911	2R	18052550	18054066	-1	Dsim\GD25420	Scf_2R	14584594	14586128	-1	Dsec\GM19931	scaffold_1	11432838	11434178	-1	CG10911	Dmau_2R	12123557	12124951	+
CG30157	2R	6974038	6975133	-1	Dsim\GD10285	Scf_2R	3720227	3721303	-1	Dsec\GM20832	scaffold_1	535732	536498	-1	CG30157	Dmau_2R	1461774	1462540	+
CG4495	2L	7182234	7185529	1
CG8336	3L	9628676	9631795	1	Dsim\GD14199	Scf_3L	9379430	9382424	1	Dsec\GM25168	scaffold_0	1857178	1858683	1	CG8336	Dmau_3L	9172081	9173590	+
CheA56a	2R	18640194	18640802	1	Dsim\GD11401	Scf_2R	15129759	15130653	1	Dsec\GM21905	scaffold_1	12035425	12036030	1	CheA56a	Dmau_2R	12666104	12666709	+
CG12391	2R	11147602	11150068	-1	Dsim\GD25942	Scf_2R	7749910	7752368	-1	Dsec\GM20473	scaffold_1	4604914	4606755	-1	CG12391	Dmau_2R	5435888	5437731	+
Ca-alpha1T	X	6104085	6192483	-1	Dsim\GD16210	Scf_X	5627767	5709051	-1	Dsec\GM12593	scaffold_4	731854	763773	1	Ca-alpha1T	Dmau_X	5525549	5533932	+
CG1951	3R	29027236	29030938	1	Dsim\GD21400	Scf_3R	24213441	24217134	1	Dsec\GM12753	scaffold_4	3714822	3717811	1	CG1951	Dmau_3R	23924749	23927739	+
CG7523	3R	17669144	17670895	-1	Dsim\GD20220	Scf_3R	7771454	7773141	1	Dsec\GM15350	scaffold_12	658650	667564	1	CG7523	Dmau_3R	7621267	7622621	+
Or47b	2R	11319710	11321312	-1
CG7203	2L	7752170	7753186	-1						Dsec\GM13361	scaffold_3	3261452	3262148	-1	CG7203	Dmau_2L	7450757	7451142	+
CG7745	2R	11307879	11309829	1	Dsim\GD10789	Scf_2R	7911056	7913035	1	Dsec\GM21277	scaffold_1	4759337	4760918	1	CG7745	Dmau_2R	5590638	5592219	+
Usf	X	4544617	4548794	-1	Dsim\GD16293	Scf_X	4131550	4134968	-1	Dsec\GM12686	scaffold_4	2285492	2287267	1	Usf	Dmau_X	4057987	4059781	+
CG9154	2L	6069790	6070686	-1	Dsim\GD22599	Scf_2L	5865101	5866021	-1	Dsec\GM17961	scaffold_5	4140564	4141345	-1	CG9154	Dmau_2L	5821639	5822420	+
mtDNA-helicase	2L	9891255	9893446	-1	Dsim\GD22331	Scf_2L	9588439	9590623	-1	Dsec\GM12211	scaffold_3	5337201	5339267	-1	mtDNA-helicase	Dmau_2L	9519504	9521563	+
CG14411	X	14832647	14836262	1	Dsim\GD17180	Scf_X	13898871	13902357	1	Dsec\GM12047	scaffold_32	168841	171366	1	CG14411	Dmau_X	13736981	13739512	+
Adk3	3R	10887345	10889588	-1	Dsim\GD20690	Scf_3R	14367461	14369748	1	Dsec\GM26136	scaffold_0	15236557	15237207	1	Adk3	Dmau_3R	14179416	14180066	+
CG4743	3R	25679242	25680550	-1	Dsim\GD18181	Scf_3R	21016390	21017753	-1	Dsec\GM10228	scaffold_13	291823	292942	-1	CG4743	Dmau_3R	20740164	20741283	+
sdk	X	686834	749496	1	Dsim\GD16523	Scf_X	494103	557117	1	Dsec\GM19086	scaffold_10	489270	491236	1	sdk	Dmau_X	526956	544360	+
CG13331	2R	13521769	13523375	1	Dsim\GD10972	Scf_2R	10070835	10074394	1	Dsec\GM21476	scaffold_1	6928249	6929784	1	CG13331	Dmau_2R	7735876	7737192	+
Eip55E	2R	18627918	18629395	1	Dsim\GD11400	Scf_2R	15117643	15119017	1	Dsec\GM21904	scaffold_1	12023182	12024363	1	Eip55E	Dmau_2R	12653969	12655150	+
CG8851	2L	3519677	3522555	1	Dsim\GD23239	Scf_2L	3379216	3382072	1	Dsec\GM18419	scaffold_5	1622814	1624713	1	CG8851	Dmau_2L	3354147	3356821	+
CG42591	3L	8069453	8069960	-1	Dsim\GD13024	Scf_3L	7872257	7873187	-1	Dsec\GM24975	scaffold_0	349211	349678	-1	CG42591	Dmau_3L	7680363	7680749	+
Su(H)	2L	15039488	15043334	1	Dsim\Su(H)	Scf_2L	14552267	14555755	1	Dsec\GM15894	scaffold_3	1302078	1304750	1	Su(H)	Dmau_2L	14455102	14457786	+
r2d2	2L	7800147	7802098	1	Dsim\r2d2	Scf_2L	7545988	7548001	1	Dsec\r2d2	scaffold_3	3314735	3315730	1	r2d2	Dmau_2L	7498504	7499503	+
CG34054	2R	11409810	11410438	-1	Dsim\GD15251	Scf_2R	8006741	8007792	-1	Dsec\GM20427	scaffold_1	4853581	4854154	-1	CG34054	Dmau_2R	5686059	5686632	+
CG34312	2R	13209809	13212237	-1	Dsim\GD25782	Scf_2R	9764510	9765819	-1	Dsec\GM20302	scaffold_1	6619917	6620511	-1	CG34312	Dmau_2R	7428207	7428873	+
CG15498	3R	21567519	21569149	-1	Dsim\GD19973	Scf_3R	3915885	3917427	1	Dsec\GM11003	scaffold_6	4095190	4096465	1	CG15498	Dmau_3R	3817848	3819089	+
CG1662	X	13387563	13389332	1	Dsim\GD17122	Scf_X	12614034	12615324	1	Dsec\GM11631	scaffold_21	1035435	1036172	1	CG1662	Dmau_X	12404661	12405398	+
RabX4	3R	24826665	24828409	-1	Dsim\GD18265	Scf_3R	20167416	20169806	-1	Dsec\GM17780	scaffold_33	35593	36635	1	RabX4	Dmau_3R	19901354	19902395	+
rho-7	2R	11986513	11988787	-1	Dsim\GD25869	Scf_2R	8578244	8580324	-1	Dsec\GM20394	scaffold_1	5425016	5426800	-1	rho-7	Dmau_2R	6256926	6258705	+
inaF-A	X	11726390	11733895	-1	Dsim\GD15973	Scf_X	11002239	11011174	-1	Dsec\GM13048	scaffold_36	316547	316816	-1	inaF-A	Dmau_X	10830867	10831136	+
niki	3R	24822401	24825648	-1	Dsim\GD18266	Scf_3R	20162562	20166436	-1	Dsec\GM17781	scaffold_33	38173	39417	1	niki	Dmau_3R	19897172	19900158	+
Su(var)2-HP2	2R	14607154	14618118	-1
tilB	X	22449737	22451463	1	Dsim\GD10326	Scf_X	20360105	20362027	1	Dsec\GM11728	scaffold_55	7863	9314	1	tilB	Dmau_X	20102464	20103868	+
CG10289	3L	6164916	6173880	-1											CG10289	Dmau_3L	5897046	5900670	+
Mtpalpha	2L	9573563	9576769	-1
CG4390	3R	20056418	20059750	-1	Dsim\GD20081	Scf_3R	5398945	5402282	1	Dsec\GM17704	scaffold_58	178007	181181	1	CG4390	Dmau_3R	5289746	5292921	+
SIP2	2R	12302544	12306269	-1
dlg1	X	11369665	11409776	1	Dsim\GD17020	Scf_X	10677622	10714959	1	Dsec\GM13075	scaffold_36	7811	15128	1	dlg1	Dmau_X	10512556	10538983	+
CG31803	2L	17411649	17412633	-1	Dsim\GD21873	Scf_2L	16917613	16918634	-1	Dsec\GM17132	scaffold_7	1053329	1054236	-1	CG31803	Dmau_2L	16685134	16686041	+
nAChRbeta2	3R	24509228	24515106	-1	Dsim\GD18288	Scf_3R	19865840	19871726	-1	Dsec\GM23481	scaffold_0	20670993	20676621	-1	nAChRbeta2	Dmau_3R	19589406	19594869	+
CG2267	3R	30627241	30629028	-1	Dsim\GD16925	Scf_3R	25773072	25774784	-1	Dsec\GM12141	scaffold_4	5280272	5281473	-1	CG2267	Dmau_3R	25474027	25475228	+
CG10097	3R	12390166	12395980	-1	Dsim\GD20573	Scf_3R	12890106	12892084	1						CG10097	Dmau_3R	12713253	12715095	+
CG31467	3R	10705170	10706863	-1	Dsim\GD20715	Scf_3R	14544469	14546121	1	Dsec\GM26161	scaffold_0	15409332	15410774	1	CG31467	Dmau_3R	14353253	14354695	+
l(1)G0007	X	14201362	14224732	1
CG30101	2R	17408258	17410204	-1	Dsim\GD25483	Scf_2R	13947644	13949598	-1	Dsec\GM19988	scaffold_1	10797282	10798634	-1	CG30101	Dmau_2R	11492636	11493902	+
CG6683	3L	8513874	8514921	-1	Dsim\GD12981	Scf_3L	8296438	8297423	-1	Dsec\GM24933	scaffold_0	786449	787106	-1	CG6683	Dmau_3L	8100185	8100842	+
CG33159	3L	3203675	3204448	-1	Dsim\GD13344	Scf_3L	3100787	3101664	-1	Dsec\GM14070	scaffold_2	3196832	3197602	-1	CG33159	Dmau_3L	3034672	3035445	+
ligatin	3R	29149896	29151794	-1
CG1387	X	8385781	8389504	1	Dsim\GD16894	Scf_X	7838309	7842177	1	Dsec\GM21518	scaffold_35	129670	132908	1	CG1387	Dmau_X	7686476	7689696	+
CG7271	3L	18588759	18590165	1	Dsim\GD14752	Scf_3L	18117076	18118519	1	Dsec\GM14935	scaffold_19	567988	569271	-1
CG10919	3R	7758122	7759677	1	Dsim\GD19945	Scf_3R	3473072	3474769	1	Dsec\GM10971	scaffold_6	3648534	3649878	1	CG10919	Dmau_3R	3376488	3377950	+
CG14561	3L	22065907	22067216	1	Dsim\GD15018	Scf_3L	21474516	21475837	1	Dsec\GM22428	scaffold_11	1994083	1994661	1	CG14561	Dmau_3L	21095155	21095733	+
Or56a	2R	19769461	19771233	-1	Dsim\GD25306	Scf_2R	16211181	16306510	-1	Dsec\GM19814	scaffold_1	13150524	13152307	-1	Or56a	Dmau_2R	13737763	13739551	+
CG7142	3R	18278181	18279522	-1	Dsim\GD20188	Scf_3R	7173839	7175421	1	Dsec\GM15310	scaffold_12	45651	46655	1	CG7142	Dmau_3R	7025972	7026976	+
Spn42De	2R	6885552	6888262	1	Dsim\GD10433	Scf_2R	3638448	3641736	1	Dsec\GM20905	scaffold_1	456300	458108	1	Spn42De	Dmau_2R	1383137	1384874	+
Ubc2	2L	10765010	10768006	-1	Dsim\GD22227	Scf_2L	10441891	10444020	-1	Dsec\GM11457	scaffold_3	6184632	6185484	-1	Ubc2	Dmau_2L	10360356	10361217	+
CG5235	3L	16087627	16090392	-1	Dsim\GD12516	Scf_3L	15699420	15702167	-1	Dsec\GM24448	scaffold_0	8182353	8182983	-1	CG5235	Dmau_3L	15435693	15437841	+
CG11261	3L	13009399	13011685	-1	Dsim\GD12683	Scf_3L	12693155	12695426	-1	Dsec\GM24616	scaffold_0	5174306	5176370	-1	CG11261	Dmau_3L	12455530	12457223	+
CG5653	3L	8964912	8966374	-1	Dsim\GD12952	Scf_3L	8742112	8743806	-1	Dsec\GM24902	scaffold_0	1228730	1230160	-1	CG5653	Dmau_3L	8544812	8546242	+
CG1339	2R	7659104	7660588	-1	Dsim\GD15305	Scf_2R	4387625	4389070	-1	Dsec\GM20772	scaffold_1	1203551	1204872	-1	CG1339	Dmau_2R	2101880	2103242	+
Lcp4	2R	8437647	8438495	1	Dsim\GD10559	Scf_2R	5137139	5137935	1	Dsec\GM21031	scaffold_1	1966662	1967057	1	Lcp4	Dmau_2R	2848918	2849244	+
dikar	3L	6728800	6743164	-1						Dsec\GM13823	scaffold_2	6661705	6665153	-1	dikar	Dmau_3L	6415707	6423418	+
CG13992	2L	5965391	5967752	-1	Dsim\GD22618	Scf_2L	5760914	5763217	-1	Dsec\GM17980	scaffold_5	4036489	4038456	-1	CG13992	Dmau_2L	5718066	5720033	+
Mal-A8	2R	8471954	8473961	1	Dsim\Mal-A8	Scf_2R	5173010	5175065	1						Mal-A8	Dmau_2R	2882367	2884315	+
CG14414	X	14580600	14582174	1	Dsim\GD17174	Scf_X	13664490	13666019	1	Dsec\GM17679	scaffold_20	1066117	1067377	1	CG14414	Dmau_X	13504622	13505913	+
REG	X	13212325	13214408	1
CG42727	3R	15348048	15350391	1	Dsim\GD19016	Scf_3R	10052850	10055196	-1						CG42727	Dmau_3R	9884794	9885429	+
Gem2	3L	19099123	19100363	-1	Dsim\GD12302	Scf_3L	18657929	18659029	-1	Dsec\GM14892	scaffold_19	1055405	1056193	-1	Gem2	Dmau_3L	18304421	18305209	+
CG8915	X	17240468	17245001	-1	Dsim\GD15688	Scf_X	16236480	16240272	-1	Dsec\GM13326	scaffold_17	976764	979831	-1	CG8915	Dmau_X	16007959	16011050	+
ine	2L	4468000	4477022	-1	Dsim\GD22702	Scf_2L	4315355	4324306	-1	Dsec\GM18085	scaffold_5	2567053	2573874	-1	ine	Dmau_2L	4288713	4295537	+
CG44001	2L	5043270	5048365	1	Dsim\GD27711	Scf_2L	4856478	4861609	1	Dsec\GM18521	scaffold_5	3133197	3134399	1	CG44001	Dmau_2L	4828144	4828810	+
CG4962	3L	16294711	16295547	-1	Dsim\GD12491	Scf_3L	15902227	15903097	-1	Dsec\GM24421	scaffold_0	8382238	8382690	-1	CG4962	Dmau_3L	15637742	15638130	+
CG31517	3R	13948420	13949742	1	Dsim\GD18938	Scf_3R	11405286	11406861	-1	Dsec\GM24142	scaffold_0	12235243	12235511	-1	CG31517	Dmau_3R	11234471	11234739	+
Prosalpha7	2R	9846636	9847836	-1	Dsim\GD10046	Scf_2R	6512313	6513498	-1	Dsec\GM24383	scaffold_255	4802	5770	-1	Prosalpha7	Dmau_2R	4210432	4211403	+
CG14625	X	1199546	1203157	1	Dsim\GD16547	Scf_X	984349	986774	1	Dsec\GM19120	scaffold_10	925123	928552	1	CG14625	Dmau_X	968762	972124	+
CG43737	X	15175441	15189931	1	Dsim\GD17198	Scf_X	14223799	14235644	1	Dsec\GM12062	scaffold_32	518738	521653	1	CG43737	Dmau_X	14061264	14068570	+
Tgt	2L	1184065	1185698	1	Dsim\GD23082	Scf_2L	1131456	1138933	1	Dsec\GM16805	scaffold_14	1144213	1145565	1	Tgt	Dmau_2L	1124921	1126272	+
tbrd-1	3R	23891597	23893383	-1	Dsim\GD18344	Scf_3R	19253494	19255341	-1	Dsec\GM23532	scaffold_0	20058142	20059674	-1	tbrd-1	Dmau_3R	18981201	18982733	+
CG15398	2L	2695330	2696437	-1	Dsim\GD22812	Scf_2L	2582960	2584178	-1	Dsec\GM18207	scaffold_5	862202	863109	-1	CG15398	Dmau_2L	2559183	2560147	+
CG7979	3L	8180923	8183369	1
Tep4	2L	19548507	19556451	1	Dsim\Tep4	Scf_2L	19042981	19051006	1	Dsec\Tep4	scaffold_7	3164251	3170740	1	Tep4	Dmau_2L	18762257	18768806	+
CG42878	2R	19587372	19587763	1	Dsim\GD28514	Scf_2R	16080877	16081812	1						CG42878	Dmau_2R	13606123	13606299	+
Chro	3L	22873702	22878984	-1	Dsim\GD12048	Scf_3L	22252189	22256825	-1	Dsec\GM22072	scaffold_11	2768422	2772372	-1	Chro	Dmau_3L	21860725	21864146	+
CG5961	3R	12458421	12460294	-1	Dsim\GD20562	Scf_3R	12828390	12830196	1	Dsec\GM26004	scaffold_0	13661787	13663188	1	CG5961	Dmau_3R	12652035	12653436	+
CG4459	3R	19926322	19928644	-1	Dsim\GD20089	Scf_3R	5530249	5532523	1	Dsec\GM26880	scaffold_25	23545	25661	1	CG4459	Dmau_3R	5421018	5423134	+
CG5569	2R	23865414	23866654	1	Dsim\GD11803	Scf_2R	20216121	20217412	1	Dsec\GM16053	scaffold_9	3044423	3045482	1	CG5569	Dmau_2R	17724033	17725137	+
CG2150	3R	31763304	31764772	-1	Dsim\GD29267	Scf_3R	26864447	26865998	-1	Dsec\GM16416	scaffold_31	244058	244836	-1	CG2150	Dmau_3R	26559667	26560448	+
CG13742	2R	9084598	9087808	-1	Dsim\GD10108	Scf_2R	5781791	5784630	-1	Dsec\GM20635	scaffold_1	2610406	2613187	-1	CG13742	Dmau_2R	3487948	3490728	+
E(spl)m6-BFM	3R	26032911	26034047	1	Dsim\m6	Scf_3R	21355672	21356768	1	Dsec\GM10298	scaffold_13	653267	653479	1	E(spl)m6-BFM	Dmau_3R	21077272	21077484	+
Sirt4	X	5664628	5665940	-1	Dsim\GD16246	Scf_X	5192975	5194305	-1	Dsec\GM12631	scaffold_4	1198157	1199264	1	Sirt4	Dmau_X	5104297	5105429	+
Dsk	3R	4189692	4190260	-1	Dsim\Dsk	Scf_3R	15971	16553	-1	Dsec\Dsk	scaffold_6	150076	150501	-1	Dsk	Dmau_3R	15435	15860	+
CG6403	3R	26735417	26736307	-1	Dsim\GD18120	Scf_3R	22020984	22021706	-1	Dsec\GM10166	scaffold_13	1334511	1335951	-1	CG6403	Dmau_3R	21740111	21740555	+
PI4KIIIalpha	X	2624804	2633672	1	Dsim\GD16613	Scf_X	2323472	2332456	1	Dsec\GM19234	scaffold_10	2285044	2293326	1
muskelin	2R	12628697	12632378	-1	Dsim\GD25828	Scf_2R	9225005	9228696	-1	Dsec\GM20349	scaffold_1	6062855	6065991	-1	muskelin	Dmau_2R	6893320	6896453	+
CG10336	2L	18689528	18690906	1	Dsim\GD28109	Scf_2L	18206075	18207559	1	Dsec\GM17286	scaffold_7	2311189	2312217	1	CG10336	Dmau_2L	17927441	17928364	+
unk	3R	23149653	23157862	-1	Dsim\GD18402	Scf_3R	18516655	18523926	-1	Dsec\GM23588	scaffold_0	19343557	19347545	-1	unk	Dmau_3R	18266558	18270495	+
eIF5B	3L	3428658	3460977	-1
CG1979	3R	7054586	7058671	1
CG9249	2L	21157433	21158611	-1	Dsim\GD21650	Scf_2L	20552096	20553333	-1	Dsec\GM23272	scaffold_18	1078865	1079757	-1	CG9249	Dmau_2L	20177523	20178512	+
Nop60B	2R	24174877	24186343	1	Dsim\GD11839	Scf_2R	20510195	20512917	1	Dsec\GM18314	scaffold_5	309655	311801	1	Nop60B	Dmau_2R	18017870	18019951	+
gcm	2L	9579498	9581745	-1	Dsim\GD22350	Scf_2L	9261962	9265223	-1	Dsec\GM12386	scaffold_3	5027142	5028732	-1	gcm	Dmau_2L	9209952	9211536	+
CG31028	3R	30166631	30171207	-1	Dsim\GD17268	Scf_3R	25337823	25342556	-1	Dsec\GM12175	scaffold_4	4845332	4849558	-1	CG31028	Dmau_3R	25042855	25047096	+
Pnn	3R	9740899	9742844	1	Dsim\GD26837	Scf_3R	15466364	15467740	-1	Dsec\GM23830	scaffold_0	16337367	16338338	-1	Pnn	Dmau_3R	15277812	15279026	+
Art9	3R	13942238	13943460	-1	Dsim\GD20468	Scf_3R	11411419	11412613	1	Dsec\GM25898	scaffold_0	12240867	12241921	1	Art9	Dmau_3R	11240088	11241141	+
Pkd2	2L	12398274	12402023	1	Dsim\GD23835	Scf_2L	12015806	12019518	1	Dsec\GM26807	scaffold_16	589163	592328	1	Pkd2	Dmau_2L	11929497	11931656	+
CG32649	X	12898768	12901114	-1	Dsim\GD15912	Scf_X	12136633	12139023	-1	Dsec\GM11527	scaffold_21	543052	545100	-1	CG32649	Dmau_X	11939506	11941554	+
CG43102	3R	17768272	17794490	-1	Dsim\GD20215	Scf_3R	7657325	7673942	1	Dsec\GM15343	scaffold_12	554166	558321	1	CG43102	Dmau_3R	7512523	7522602	+
PebIII	2R	24026172	24027518	1
CG15219	2L	22104891	22105512	-1	Dsim\GD21620	Scf_2L	21331067	21331686	-1	Dsec\GM16117	scaffold_28	709223	709699	-1	CG15219	Dmau_2L	20866604	20867079	+
CG11851	3R	25221589	25224118	1	Dsim\GD21188	Scf_3R	20556415	20558949	1	Dsec\GM17819	scaffold_33	308067	310105	1	CG11851	Dmau_3R	20289453	20291490	+
Bet5	3R	30180232	30181486	1	Dsim\GD28962	Scf_3R	25351487	25352284	1	Dsec\GM12867	scaffold_4	4858855	4859493	1	Bet5	Dmau_3R	25056348	25056997	+
Sps2	2L	10342594	10344223	1	Dsim\GD23681	Scf_2L	10020748	10022386	1	Dsec\GM18202	scaffold_3	5768193	5769252	1	Sps2	Dmau_2L	9946651	9947934	+
TfIIA-S	3R	23890388	23891060	-1	Dsim\GD18345	Scf_3R	19252376	19253101	-1	Dsec\GM23533	scaffold_0	20057053	20057453	-1	TfIIA-S	Dmau_3R	18980166	18980566	+
pcl	X	436139	437448	-1
Rpb12	2R	15144968	15145519	-1	Dsim\GD25636	Scf_2R	11703449	11704001	-1	Dsec\GM20158	scaffold_1	8526934	8527303	-1	Rpb12	Dmau_2R	9277554	9277925	+
CG43229	X	18138542	18139000	1	Dsim\GD24686	Scf_X	17120893	17121296	1	Dsec\GM22882	scaffold_8	342605	342853	1	CG43229	Dmau_X	16886480	16886728	+
Rab9Fb	X	10951609	10952486	-1	Dsim\GD11278	Scf_X	10291193	10292039	-1	Dsec\GM11275	scaffold_15	1547533	1548180	-1	Rab9Fb	Dmau_X	10117443	10118090	+
Gr36a	2L	17176618	17177921	1	Dsim\GD24101	Scf_2L	16688867	16690166	1	Dsec\GM17226	scaffold_7	804901	808191	1	Gr36a	Dmau_2L	16457271	16458569	+
Cdc5	3L	357851	361383	-1	Dsim\GD25709	Scf_3L	328755	332162	-1	Dsec\GM14280	scaffold_2	388023	390654	-1	Cdc5	Dmau_3L	315189	317820	+
Shaw	2L	3718185	3729145	1	Dsim\GD23250	Scf_2L	3571288	3580665	1	Dsec\GM18431	scaffold_5	1816957	1822597	1	Shaw	Dmau_2L	3548970	3554655	+
CG34041	3R	30508023	30510146	1	Dsim\GD21525	Scf_3R	25653886	25656085	1	Dsec\GM12886	scaffold_4	5153617	5154344	1	CG34041	Dmau_3R	25354317	25356447	+
LSm1	2R	21169969	21170672	-1	Dsim\GD25220	Scf_2R	17567722	17568424	-1	Dsec\GM15742	scaffold_9	384011	384539	-1	LSm1	Dmau_2R	15089373	15089901	+
dpr6	3L	9974651	10139360	1	Dsim\GD14231	Scf_3L	9748014	9944207	1	Dsec\GM25200	scaffold_0	2220365	2257584	1	dpr6	Dmau_3L	9565998	9573932	+
Uch	2L	2212738	2214211	-1	Dsim\GD22865	Scf_2L	2105734	2107214	-1	Dsec\GM18256	scaffold_5	387450	388408	-1	Uch	Dmau_2L	2083737	2084695	+
CG17027	3L	15980100	15981888	1	Dsim\GD14585	Scf_3L	15591724	15593465	1	Dsec\GM25570	scaffold_0	8073544	8074594	1	CG17027	Dmau_3L	15328412	15329495	+
CG9702	3R	30579429	30582117	1	Dsim\GD21533	Scf_3R	25724936	25727652	1	Dsec\GM12894	scaffold_4	5232199	5234621	1	CG9702	Dmau_3R	25425614	25428026	+
CG32187	3L	17804916	17806365	-1	Dsim\GD12375	Scf_3L	17377932	17379381	-1	Dsec\GM24307	scaffold_0	9844667	9846016	-1	CG32187	Dmau_3L	17079119	17080468	+
CG12605	3L	3954251	3964771	-1	Dsim\GD13794	Scf_3L	3871559	3881543	1	Dsec\GM14024	scaffold_2	3951512	3955009	-1	CG12605	Dmau_3L	3779793	3783277	+
CG43850	2L	13415431	13420645	1	Dsim\GD29306	Scf_2L	12990292	12995433	1						CG43850	Dmau_2L	12906688	12906918	+
His3:CG33812	2L	21440187	21440715	1	Dsim\GD27984	Scf_X	8582172	8584991	-1	Dsec\GM18523	scaffold_5	3142340	3142840	1
His2A:CG33814	2L	21452934	21453426	1	Dsim\GD24469	Scf_NODE_42015	2095	2436	1	Dsec\GM11111	scaffold_3637	2089	2463	1
dlt	3L	1789631	1795328	-1	Dsim\GD13437	Scf_3L	1699476	1705159	-1	Dsec\GM14168	scaffold_2	1815912	1819634	-1	dlt	Dmau_3L	1675983	1679702	+
CG10710	3L	13516273	13519605	-1	Dsim\GD12652	Scf_3L	13213015	13218490	-1	Dsec\GM24583	scaffold_0	5685058	5687198	-1	CG10710	Dmau_3L	12961526	12963664	+
sip1	2L	5721051	5723944	1	Dsim\GD23359	Scf_2L	5525857	5528741	1	Dsec\STIP	scaffold_5	3800189	3802823	1	sip1	Dmau_2L	5483309	5485943	+
CG42813	3R	27227070	27228561	-1	Dsim\GD18086	Scf_3R	22494857	22495988	-1	Dsec\GM10125	scaffold_13	1807782	1809386	-1	CG42813	Dmau_3R	22212392	22213155	+
Send1	2L	2254176	2255050	-1	Dsim\GD23142	Scf_2L	2147842	2148646	1	Dsec\GM18245	scaffold_5	426976	427728	-1	Send1	Dmau_2L	2126916	2127683	+
CG10566	3L	21131446	21133310	1
l(2)37Bb	2L	19049843	19051612	-1	Dsim\GD21785	Scf_2L	18567183	18568969	-1	Dsec\GM17037	scaffold_7	2679826	2681435	-1	l(2)37Bb	Dmau_2L	18286356	18287965	+
CG43064	3L	11834721	11836721	-1	Dsim\GD28156	Scf_3L	11529604	11531504	-1	Dsec\GM24702	scaffold_0	4014248	4017306	-1	CG43064	Dmau_3L	11302106	11303493	+
AGBE	2R	13171401	13174796	1	Dsim\GD10945	Scf_2R	9726471	9729910	1	Dsec\GM21447	scaffold_1	6581816	6584999	1	AGBE	Dmau_2R	7390501	7393686	+
CG42553	3L	834093	835515	1	Dsim\GD13573	Scf_3L	797954	799388	1	Dsec\GM14355	scaffold_2	861847	863553	1	CG42553	Dmau_3L	782352	783629	+
CG11294	X	8691820	8693620	-1	Dsim\GD16098	Scf_X	8142518	8143946	-1	Dsec\GM21128	scaffold_35	431425	432369	-1	CG11294	Dmau_X	7983114	7984440	+
CG32457	3L	22987642	22988262	1	Dsim\GD17954	Scf_3L	22369370	22369988	1	Dsec\GM19495	scaffold_41	10570	10989	1	CG32457	Dmau_3L	21974392	21974854	+
Argk	3L	9048781	9066027	-1	Dsim\GD29168	Scf_3L	8826243	8843316	-1	Dsec\GM24893	scaffold_0	1312802	1327995	-1	Argk	Dmau_3L	8629132	8644402	+
CG34290	3R	24288553	24289818	-1	Dsim\GD18304	Scf_3R	19646440	19672527	-1	Dsec\GM23497	scaffold_0	20448610	20449581	-1	CG34290	Dmau_3R	19371421	19372609	+
polybromo	3R	24799967	24805259	-1	Dsim\GD18270	Scf_3R	20140164	20145621	-1	Dsec\GM23463	scaffold_0	20961292	20966465	-1	polybromo	Dmau_3R	19874858	19879996	+
Eig71Ej	3L	15660549	15661015	-1	Dsim\GD12545	Scf_3L	15280687	15281342	-1	Dsec\GM24470	scaffold_0	7765314	7765679	-1	Eig71Ej	Dmau_3L	15022159	15022527	+
ogre	X	6973620	6991318	-1	Dsim\GD16171	Scf_X	6457168	6464980	-1	Dsec\GM17487	scaffold_24	96024	98948	-1	ogre	Dmau_X	6331565	6334500	+
CG17233	3L	20233173	20241903	-1	Dsim\GD12206	Scf_3L	19708964	19717696	-1	Dsec\GM22237	scaffold_11	131563	136454	-1	CG17233	Dmau_3L	19339201	19345776	+
CG5122	2L	13130591	13134804	1	Dsim\GD23864	Scf_2L	12712289	12716510	1	Dsec\GM10135	scaffold_16	1285785	1289750	1	CG5122	Dmau_2L	12625644	12629214	+
CG12531	X	19718923	19730199	1	Dsim\GD17458	Scf_X	18489397	18501134	1	Dsec\GM22986	scaffold_8	1888346	1895693	1	CG12531	Dmau_X	18406904	18414214	+
Obp49a	2R	12690059	12690955	-1	Dsim\Obp49a	Scf_2R	9286412	9287342	-1	Dsec\Obp49a	scaffold_1	6123791	6124546	-1	Obp49a	Dmau_2R	6954792	6955547	+
CG40470	3L	23839860	23986410	-1	Dsim\GD28678	Scf_3L	23044114	23080115	-1
CG15196	X	11409947	11411667	1	Dsim\GD24791	Scf_X	10720154	10721770	1	Dsec\GM13077	scaffold_36	26612	28377	1	CG15196	Dmau_X	10546079	10547526	+
CHIP	2L	10437548	10439240	1
RpS3A	4	65225	67207	-1	Dsim\GD28493	Scf_4	40819	41826	-1	Dsec\GM23236	scaffold_52	30720	31627	-1	RpS3A	Dmau_4	32825	33730	+
milt	2L	7037823	7056010	1	Dsim\GD23451	Scf_2L	6798682	6816597	1	Dsec\GM16300	scaffold_3	2575443	2579450	1	milt	Dmau_2L	6760983	6769099	+
CG6462	3L	6037111	6038188	1	Dsim\GD13921	Scf_3L	5941689	5943586	1	Dsec\GM14740	scaffold_2	5980896	5985184	1	CG6462	Dmau_3L	5776017	5776976	+
CG11192	2R	20354108	20355067	-1	Dsim\GD25281	Scf_2R	16777267	16778211	-1	Dsec\GM19789	scaffold_1	13807886	13808725	-1	CG11192	Dmau_2R	14302761	14303600	+
CR33496	X	20186630	20187472	-1
Or19a	X	20141819	20143188	-1	Dsim\GD25271	Scf_NODE_19857	1855	3287	1	Dsec\GM22693	scaffold_8	2259955	2261379	-1
ppk28	X	16806068	16808515	1	Dsim\GD17312	Scf_X	15789569	15793272	1	Dsec\GM13471	scaffold_17	529485	531589	1	ppk28	Dmau_X	15586801	15588899	+
CG6388	2L	12428028	12430021	1	Dsim\GD23837	Scf_2L	12045140	12047181	1	Dsec\GM26818	scaffold_16	618392	620304	1	CG6388	Dmau_2L	11957830	11959742	+
MCO3	3R	25897476	25899744	1	Dsim\GD21245	Scf_3R	21219485	21221963	1	Dsec\GM10275	scaffold_13	506876	508712	1	MCO3	Dmau_3R	20940755	20942854	+
eIF2B-alpha	3R	29934582	29935888	-1
CG15369	X	9216872	9217466	1	Dsim\GD16941	Scf_X	8644497	8645004	1	Dsec\GM11662	scaffold_345	12520	12944	1
ntc	3L	3803832	3806459	-1						Dsec\GM14039	scaffold_2	3798157	3800368	-1	ntc	Dmau_3L	3627970	3630130	+
Caf1-180	X	8602137	8606304	-1	Dsim\GD24564	Scf_X	8056448	8060637	-1	Dsec\GM21191	scaffold_35	347153	348828	-1	Caf1-180	Dmau_X	7897831	7901526	+
rtp	3R	5236092	5237315	-1	Dsim\GD19636	Scf_3R	968521	969693	-1	Dsec\GM10655	scaffold_6	1186121	1187036	-1	rtp	Dmau_3R	951598	952513	+
CG14967	3L	3210992	3218920	-1	Dsim\GD13339	Scf_3L	3108378	3116236	-1	Dsec\GM14064	scaffold_2	3205151	3212663	-1	CG14967	Dmau_3L	3042516	3049942	+
cN-IIIB	2R	24195498	24197027	1	Dsim\GD11843	Scf_2R	20523428	20524987	1	Dsec\GM18318	scaffold_5	323136	324095	1	cN-IIIB	Dmau_2R	18031298	18032257	+
CG43675	3R	9355495	9359189	1	Dsim\GD18706	Scf_3R	15842548	15844688	-1	Dsec\GM23796	scaffold_0	16711006	16714697	-1	CG43675	Dmau_3R	15653499	15654712	+
CG10731	2R	16148812	16149795	-1	Dsim\GD25566	Scf_2R	12706125	12707105	-1	Dsec\GM20089	scaffold_1	9531900	9532508	-1	CG10731	Dmau_2R	10262245	10262852	+
Cib2	2R	20879930	20882663	1	Dsim\GD11545	Scf_2R	17279903	17283321	1	Dsec\GM15782	scaffold_9	93249	95635	1	Cib2	Dmau_2R	14804069	14806449	+
D19A	3L	6185830	6189123	-1	Dsim\GD13138	Scf_3L	6089619	6092665	-1	Dsec\GM13853	scaffold_2	6155792	6158386	-1	D19A	Dmau_3L	5913637	5916232	+
Pgam5	X	1872400	1873565	-1	Dsim\GD16411	Scf_X	1623703	1624892	-1	Dsec\GM18947	scaffold_10	1567124	1568059	-1	Pgam5	Dmau_X	1603180	1604115	+
BicC	2L	16042047	16048757	1	Dsim\GD24037	Scf_2L	15580954	15587459	1	Dsec\GM18651	scaffold_5	4777536	4781660	1	BicC	Dmau_2L	15365544	15369615	+
Dll	2R	24814822	24835667	1	Dsim\GD11901	Scf_2R	21120007	21139393	1	Dsec\GM11904	scaffold_23	559602	578137	1	Dll	Dmau_2R	18625461	18643789	+
CG12992	X	17588865	17591706	1	Dsim\GD15672	Scf_X	16584749	16587781	1	Dsec\GM13514	scaffold_17	1327774	1329126	1	CG12992	Dmau_X	16354155	16354683	+
CG14478	2R	17457663	17465795	1
CG6420	3R	26719847	26725216	-1	Dsim\GD18121	Scf_3R	22005564	22010529	-1	Dsec\GM10167	scaffold_13	1320355	1324414	-1	CG6420	Dmau_3R	21725085	21729059	+
Obp50d	2R	14373108	14373808	1	Dsim\Obp50c	Scf_2R	10968255	10970054	1	Dsec\Obp50d	scaffold_1	7768348	7768981	1	Obp50d	Dmau_2R	8549913	8550546	+
CG1399	2R	7676540	7698902	-1
Pvf3	2L	7098188	7157695	-1	Dsim\GD22512	Scf_2L	6860284	6917852	-1	Dsec\GM13633	scaffold_3	2624353	2656979	-1	Pvf3	Dmau_2L	6869580	6870767	+
CG14195	X	19208694	19212082	-1	Dsim\GD15593	Scf_X	17992452	17995048	-1	Dsec\GM22758	scaffold_8	1397674	1400178	-1	CG14195	Dmau_X	17915860	17918298	+
CG15570	X	4218170	4223331	1	Dsim\GD16675	Scf_X	3811258	3816205	1	Dsec\GM12332	scaffold_4	2614483	2619076	-1	CG15570	Dmau_X	3743035	3745693	+
Sr-CIII	2L	4120343	4121627	1	Dsim\Sr-CIII	Scf_2L	3969631	3970938	1	Dsec\GM18453	scaffold_5	2219128	2220193	1	Sr-CIII	Dmau_2L	3943858	3944928	+
Nca	3L	19991887	19997568	1	Dsim\GD14847	Scf_3L	19476348	19482126	1	Dsec\GM19732	scaffold_29	634709	635481	1	Nca	Dmau_3L	19116745	19117517	+
CG1824	X	12592555	12595624	-1	Dsim\GD15923	Scf_X	11831121	11834198	-1	Dsec\GM11542	scaffold_21	241244	244077	-1	CG1824	Dmau_X	11641083	11643914	+
CG30120	2R	18446548	18449420	1	Dsim\GD11386	Scf_2R	14958959	14961860	1	Dsec\GM21889	scaffold_1	11811952	11813607	1	CG30120	Dmau_2R	12496616	12498271	+
CG8596	3L	7341884	7345183	-1
PIP5K59B	2R	22874769	22881436	1	Dsim\GD11719	Scf_2R	19244708	19251457	1	Dsec\GM15967	scaffold_9	2061229	2066488	1	PIP5K59B	Dmau_2R	16755987	16761102	+
l(3)72Dr	3L	16237723	16239462	1	Dsim\GD14609	Scf_3L	15845186	15847056	1	Dsec\GM25601	scaffold_0	8325084	8326712	1	l(3)72Dr	Dmau_3L	15580730	15582357	+
nuf	3L	14190870	14233250	1	Dsim\GD14483	Scf_3L	13856513	13897382	1	Dsec\GM25461	scaffold_0	6365105	6371149	1	nuf	Dmau_3L	13636120	13642205	+
CG15107	2R	18971309	18972537	-1	Dsim\GD25344	Scf_2R	15462533	15463767	-1	Dsec\GM19857	scaffold_1	12365077	12365920	-1	CG15107	Dmau_2R	12994278	12995116	+
Pms2	2R	15368074	15371520	-1	Dsim\GD25619	Scf_2R	11917494	11920940	-1	Dsec\GM20141	scaffold_1	8739825	8742942	-1	Pms2	Dmau_2R	9491104	9494221	+
Gr58c	2R	21976662	21977957	1	Dsim\GD11639	Scf_2R	18357307	18358619	1						Gr58c	Dmau_2R	15875932	15877228	+
VhaAC39-1	X	3880748	3882967	1	Dsim\GD16660	Scf_X	3472363	3474655	1	Dsec\GM12314	scaffold_4	2931273	2932763	-1
Ssdp	3R	18192494	18199595	-1	Dsim\GD20197	Scf_3R	7256020	7257949	1	Dsec\GM15321	scaffold_12	129846	131183	1	Ssdp	Dmau_3R	7108508	7121671	+
CG17376	2L	6799946	6800894	-1											CG17376	Dmau_2L	6529725	6530000	+
CG8080	2R	9089774	9092893	-1	Dsim\GD10107	Scf_2R	5786774	5789959	-1	Dsec\GM20634	scaffold_1	2615525	2618143	-1	CG8080	Dmau_2R	3493069	3494962	+
CG10585	3L	21027915	21030141	1	Dsim\GD14926	Scf_3L	20472153	20474326	1	Dsec\GM22336	scaffold_11	909767	911332	1	CG10585	Dmau_3L	20092755	20094319	+
mRpS33	3R	16436045	16436597	-1	Dsim\GD20290	Scf_3R	8987760	8988318	1	Dsec\GM15434	scaffold_12	1884937	1885341	1	mRpS33	Dmau_3R	8825593	8825997	+
CG2321	3R	29484783	29489265	-1	Dsim\GD17786	Scf_3R	24640753	24674940	-1	Dsec\GM12243	scaffold_4	4171287	4173322	-1	CG2321	Dmau_3R	24379896	24381931	+
CG43394	2L	8145758	8158786	1	Dsim\GD23508	Scf_2L	7873010	7886291	1	Dsec\GM16786	scaffold_3	3654040	3655923	1	CG43394	Dmau_2L	7831772	7837820	+
kl-5	Y	22250	137486	-1
CG7386	3L	6189745	6192049	1	Dsim\GD13947	Scf_3L	6093209	6095588	1	Dsec\GM14770	scaffold_2	6159220	6161308	1	CG7386	Dmau_3L	5917063	5919108	+
CG17739	2R	12306528	12310412	1	Dsim\GD10852	Scf_2R	8900623	8904416	1	Dsec\GM21355	scaffold_1	5743248	5746192	1	CG17739	Dmau_2R	6575495	6578435	+
Ccp84Ab	3R	6701968	6702877	-1	Dsim\GD19526	Scf_3R	2425236	2425791	1	Dsec\GM10912	scaffold_6	2622934	2623624	1
CG8949	X	17068717	17077897	-1
CG32319	3L	1470850	1472060	-1
CG42399	2L	144231	153300	-1	Dsim\GD22984	Scf_2L	128507	139217	-1	Dsec\GM16695	scaffold_14	143239	148330	-1	CG42399	Dmau_2L	128143	136838	+
cnir	2L	3038826	3039812	-1	Dsim\GD22782	Scf_2L	2917469	2918599	-1	Dsec\GM18171	scaffold_5	1196410	1196999	-1	cnir	Dmau_2L	2894386	2894975	+
SMSr	3L	7374050	7381474	-1	Dsim\GD13061	Scf_3L	7233301	7237538	-1	Dsec\GM13763	scaffold_2	7291662	7295185	-1	SMSr	Dmau_3L	7044409	7047899	+
CG14315	3R	18158701	18159471	1	Dsim\GD19203	Scf_3R	7293496	7294262	-1	Dsec\GM15279	scaffold_12	167813	168466	-1	CG14315	Dmau_3R	7145401	7146054	+
CG9669	3L	16844568	16844991	-1											CG9669	Dmau_3L	16158909	16159145	+
CG7332	X	18884513	18888860	1	Dsim\GD17416	Scf_X	17684086	17688052	1	Dsec\GM22931	scaffold_8	1081467	1084205	1	CG7332	Dmau_X	17611496	17614273	+
IM10	2R	13407011	13408358	1
CG3476	2L	7027526	7028959	1
CG3222	3L	9598988	9600341	1	Dsim\GD14193	Scf_3L	9349780	9351159	1	Dsec\GM25159	scaffold_0	1820203	1821341	1	CG3222	Dmau_3L	9141324	9142463	+
CG32201	3L	18609620	18611862	1	Dsim\GD14757	Scf_3L	18136319	18138652	1	Dsec\GM14980	scaffold_19	583239	585377	1	CG32201	Dmau_3L	17830405	17832504	+
grp	2L	16680054	16699926	1	Dsim\GD24070	Scf_2L	16207497	16227683	1	Dsec\GM17194	scaffold_7	338167	346651	1	grp	Dmau_2L	15991821	16000285	+
eIF4E-4	3L	6664224	6665641	-1
Jra	2R	10096480	10098556	1	Dsim\GD15385	Scf_2R	6759771	6761869	1	Dsec\GM21184	scaffold_1	3600380	3601237	1	Jra	Dmau_2R	4456427	4457545	+
CG14795	X	1512227	1512803	-1	Dsim\GD24634	Scf_X	1286537	1287317	-1	Dsec\GM18967	scaffold_10	1233563	1234037	-1	CG14795	Dmau_X	1270134	1270599	+
CG43673	X	15779146	15780214	1	Dsim\GD28224	Scf_X	14839006	14840160	1						CG43673	Dmau_X	14642812	14643494	+
CG42449	X	5683240	5684456	1	Dsim\GD16743	Scf_X	5210928	5212439	1	Dsec\GM12426	scaffold_4	1180165	1180663	-1	CG42449	Dmau_X	5122452	5123466	+
CG14569	3L	21730725	21731550	-1	Dsim\GD12092	Scf_3L	21141229	21142469	-1	Dsec\GM22115	scaffold_11	1645245	1645832	-1	CG14569	Dmau_3L	20762962	20763549	+
CG3894	2R	24763167	24766750	1	Dsim\GD11895	Scf_2R	21070090	21071727	1	Dsec\GM11897	scaffold_23	509390	510476	1	CG3894	Dmau_2R	18575109	18576194	+
S-Lap8	2R	16491100	16493233	1	Dsim\GD11201	Scf_2R	13056857	13058994	1	Dsec\GM21704	scaffold_1	9882660	9884353	1	S-Lap8	Dmau_2R	10602943	10604633	+
CG6083	3L	11624528	11626125	-1	Dsim\GD12788	Scf_3L	11325803	11327365	-1	Dsec\GM24728	scaffold_0	3804971	3806217	-1	CG6083	Dmau_3L	11099481	11100735	+
Vha16-2	3L	11474958	11475552	1
CG14659	3R	4830849	4831297	-1	Dsim\GD19648	Scf_3R	591346	593142	-1	Dsec\GM10673	scaffold_6	761535	761828	-1	CG14659	Dmau_3R	576059	576349	+
CG4021	2R	21773295	21774876	1	Dsim\GD21670	Scf_ICT10	767	2379	-1	Dsec\GM15642	scaffold_9	1605439	1606989	-1
CG43742	2R	21935002	21936863	-1	Dsim\GD27658	Scf_2R	18315643	18319053	-1						CG43742	Dmau_2R	15838188	15838822	+
CG3719	X	1378885	1380480	-1	Dsim\GD16424	Scf_X	1151938	1153592	-1	Dsec\GM18978	scaffold_10	1096595	1096813	-1	CG3719	Dmau_X	1137722	1138964	+
NijC	3R	12695129	12697379	1	Dsim\GD18856	Scf_3R	12635202	12637429	-1	Dsec\GM24058	scaffold_0	13462360	13463895	-1	NijC	Dmau_3R	12460105	12461647	+
Atf3	X	1242740	1275284	-1
tipE	3L	4188499	4193788	1	Dsim\GD13821	Scf_3L	4148501	4153825	1	Dsec\GM14633	scaffold_2	4183263	4184910	1	tipE	Dmau_3L	4010863	4012523	+
Syt1	2L	2772327	2799979	-1	Dsim\GD22802	Scf_2L	2661805	2680806	-1	Dsec\GM18197	scaffold_5	942530	953310	-1	Syt1	Dmau_2L	2640290	2651022	+
CG34458	2R	16672033	16672889	1	Dsim\GD28345	Scf_2R	13231855	13232699	1						CG34458	Dmau_2R	10777471	10778244	+
CG13144	2L	10489900	10491454	-1	Dsim\GD22249	Scf_2L	10168520	10170360	-1	Dsec\GM11641	scaffold_3	5917874	5918749	-1	CG13144	Dmau_2L	10094719	10095594	+
dik	X	18085761	18088418	1
CG7139	3L	22067270	22071848	-1
CG7916	2L	13846752	13847799	1
Usp7	X	12022837	12029032	-1	Dsim\GD15945	Scf_X	11282425	11287286	-1	Dsec\GM13227	scaffold_53	136322	139886	-1	Usp7	Dmau_X	11101457	11105020	+
RpL7-like	2L	12056326	12058251	1	Dsim\GD23812	Scf_2L	11685438	11686571	1	Dsec\GM26715	scaffold_16	251802	252705	1	RpL7-like	Dmau_2L	11598665	11599492	+
ytr	2R	23847161	23851480	-1	Dsim\GD25007	Scf_2R	20198017	20202050	-1	Dsec\GM15504	scaffold_9	3027652	3029996	-1	ytr	Dmau_2R	17707128	17709510	+
Cpr97Eb	3R	27089704	27091130	-1	Dsim\GD18097	Scf_3R	22365824	22367269	-1	Dsec\GM10136	scaffold_13	1677489	1678557	-1	Cpr97Eb	Dmau_3R	22083820	22084529	+
Wnt2	2R	9494166	9503188	1	Dsim\GD10659	Scf_2R	6166403	6175416	1	Dsec\GM21127	scaffold_1	2997315	3005243	1	Wnt2	Dmau_2R	3867530	3875551	+
RpL37b	2R	23100057	23100478	-1	Dsim\GD28161	Scf_2R	19464595	19465030	-1	Dsec\GM15582	scaffold_9	2281171	2281440	-1	RpL37b	Dmau_2R	16973916	16974185	+
UbcE2H	X	8087544	8094064	-1	Dsim\GD16131	Scf_X	7542825	7548914	-1	Dsec\GM11213	scaffold_44	67307	67858	-1	UbcE2H	Dmau_X	7395528	7396079	+
CG5478	3R	15932700	15933734	-1	Dsim\GD20316	Scf_3R	9491368	9492423	1	Dsec\GM25742	scaffold_0	10199299	10200087	1	CG5478	Dmau_3R	9326893	9327681	+
CG34436	3R	28282580	28283548	1	Dsim\GD21367	Scf_3R	23486319	23487321	1						CG34436	Dmau_3R	23201118	23202046	+
CG13890	3L	851346	852673	1	Dsim\GD13579	Scf_3L	815369	816698	1	Dsec\GM14360	scaffold_2	879547	880450	1	CG13890	Dmau_3L	799733	800636	+
Fkbp14	2R	21487167	21497929	-1	Dsim\GD25197	Scf_2R	17884075	17893929	-1	Dsec\GM15719	scaffold_9	705020	715051	-1	Fkbp14	Dmau_2R	15405968	15413527	+
CG2004	X	8712472	8714924	-1	Dsim\GD16097	Scf_X	8160098	8162422	-1	Dsec\GM21117	scaffold_35	448041	449519	-1	CG2004	Dmau_X	8000125	8001613	+
dpr20	3L	852720	857248	-1	Dsim\GD13504	Scf_3L	816729	821321	-1	Dsec\GM14247	scaffold_2	881372	884846	-1	dpr20	Dmau_3L	801564	804810	+
MFS16	2R	21282298	21285679	1	Dsim\GD11582	Scf_2R	17679305	17682685	1	Dsec\GM15825	scaffold_9	499896	502572	1	MFS16	Dmau_2R	15201320	15203965	+
tra2	2R	14602004	14604337	-1	Dsim\GD25673	Scf_2R	11191586	11193753	-1	Dsec\GM20203	scaffold_1	8006888	8008565	-1	tra2	Dmau_2R	8764651	8766316	+
RpL23	2R	22854383	22855694	1	Dsim\GD11716	Scf_2R	19224502	19225816	1	Dsec\GM15964	scaffold_9	2040943	2042073	1	RpL23	Dmau_2R	16735562	16736564	+
CG18869	3L	4059770	4061923	1	Dsim\GD13807	Scf_3L	4020229	4022389	1	Dsec\GM14618	scaffold_2	4052359	4054291	1	CG18869	Dmau_3L	3880657	3882589	+
CG14340	2L	1112941	1114138	1	Dsim\GD23068	Scf_2L	1060373	1062656	1	Dsec\GM16791	scaffold_14	1066276	1067233	1	CG14340	Dmau_2L	1054153	1055115	+
Pez	2L	6332881	6338671	-1	Dsim\GD22589	Scf_2L	6128569	6133773	-1	Dsec\GM17951	scaffold_5	4404079	4408891	-1	Pez	Dmau_2L	6084643	6089500	+
CG9313	2R	20978901	20984043	1	Dsim\GD11552	Scf_2R	17379241	17383915	1	Dsec\GM15791	scaffold_9	197764	202012	1	CG9313	Dmau_2R	14902723	14906953	+
tyn	X	142208	200663	1	Dsim\GD16493	Scf_X	29809	74759	1	Dsec\GM11116	scaffold_108	70723	73200	1
Kaz-m1	3R	26014721	26016487	1	Dsim\m1	Scf_3R	21337231	21338006	1	Dsec\GM10296	scaffold_13	635085	635617	1	Kaz-m1	Dmau_3R	21059030	21059562	+
14-3-3epsilon	3R	18242531	18250550	1	Dsim\GD15169	Scf_3R	7203904	7211021	-1	Dsec\GM15292	scaffold_12	76477	81922	-1	14-3-3epsilon	Dmau_3R	7057081	7062533	+
CG8405	2R	16047648	16060835	1	Dsim\GD11155	Scf_2R	12602461	12620422	1	Dsec\GM21655	scaffold_1	9434277	9445644	1	CG8405	Dmau_2R	10164360	10175820	+
Aatf	2L	6717625	6719389	1	Dsim\GD23427	Scf_2L	6490938	6492703	1	Dsec\GM16208	scaffold_3	2256363	2257897	1	Aatf	Dmau_2L	6446440	6447986	+
CG4797	2R	23812185	23818327	-1	Dsim\GD25011	Scf_2R	20163355	20169421	-1	Dsec\GM15509	scaffold_9	2992144	2997691	-1	CG4797	Dmau_2R	17671500	17674650	+
CG13344	2R	13861997	13864156	1	Dsim\GD10992	Scf_2R	10438805	10440935	1	Dsec\GM21499	scaffold_1	7276521	7277769	1	CG13344	Dmau_2R	8065674	8066852	+
boca	2R	7565873	7566738	-1	Dsim\GD10238	Scf_2R	4300615	4301486	-1	Dsec\GM20777	scaffold_1	1116564	1117267	-1	boca	Dmau_2R	2014709	2015413	+
CG10950	2R	17195203	17197159	1	Dsim\GD11256	Scf_2R	13740085	13742136	1	Dsec\GM21765	scaffold_1	10586372	10588132	1	CG10950	Dmau_2R	11285082	11286842	+
CG8560	3L	7402332	7404181	-1	Dsim\GD13057	Scf_3L	7260052	7261905	-1	Dsec\GM13761	scaffold_2	7325592	7327138	-1	CG8560	Dmau_3L	7070629	7072191	+
mRpL30	X	4647871	4648646	1	Dsim\GD16700	Scf_X	4232919	4233699	1	Dsec\GM12357	scaffold_4	2186755	2187377	-1	mRpL30	Dmau_X	4155949	4156571	+
ATPsyngamma	3R	29747704	29749163	-1	Dsim\GD17673	Scf_3R	24929880	24931100	-1	Dsec\GM12224	scaffold_4	4426265	4427158	-1	ATPsyngamma	Dmau_3R	24636099	24636992	+
CG9784	X	16595136	16599215	-1	Dsim\GD27861	Scf_X	15579673	15581666	-1						CG9784	Dmau_X	15378398	15379957	+
scramb2	3L	3044113	3046812	-1	Dsim\GD13361	Scf_3L	2910449	2913130	-1	Dsec\GM14090	scaffold_2	3047190	3049064	-1	scramb2	Dmau_3L	2885282	2887167	+
CG12398	X	14911781	14913812	-1	Dsim\GD22252	Scf_X	13977118	13979137	-1	Dsec\GM12018	scaffold_32	246322	248275	-1	CG12398	Dmau_X	13814749	13816703	+
CG4627	2R	13214706	13215760	1	Dsim\GD10950	Scf_2R	9769536	9770640	1	Dsec\GM21451	scaffold_1	6625204	6625764	1	CG4627	Dmau_2R	7433386	7433999	+
CR43176	Y	3364463	3365197	1
BtbVII	3L	3148646	3158408	1	Dsim\GD13729	Scf_3L	3006655	3016502	1	Dsec\GM14536	scaffold_2	3149346	3151204	1	BtbVII	Dmau_3L	2981468	2989088	+
AOX1	3R	15532137	15537292	-1	Dsim\GD20338	Scf_3R	9865218	9870898	1	Dsec\GM25762	scaffold_0	10573414	10578260	1
CG11808	2R	15216207	15217070	1	Dsim\GD11103	Scf_2R	11774666	11775596	1	Dsec\GM21597	scaffold_1	8597685	8598407	1	CG11808	Dmau_2R	9348360	9349088	+
garz	2R	12326360	12333860	1	Dsim\GD10856	Scf_2R	8918886	8926321	1	Dsec\GM21360	scaffold_1	5759921	5766733	1	garz	Dmau_2R	6593316	6600150	+
uex	2R	3900285	3949425	-1	Dsim\GD28306	Scf_NODE_29060	3729	22187	1
sd	X	15804370	15827682	1	Dsim\GD24822	Scf_X	14860507	14882068	1	Dsec\GM22588	scaffold_37	289396	299444	1	sd	Dmau_X	14683355	14684498	+
CG3156	X	487878	490725	1	Dsim\GD16508	Scf_X	301508	304316	1	Dsec\GM19068	scaffold_10	238875	240450	1	CG3156	Dmau_X	292602	295156	+
swif	2R	8363272	8365345	-1	Dsim\GD15280	Scf_2R	5069404	5071448	-1	Dsec\GM20697	scaffold_1	1897012	1897869	-1	swif	Dmau_2R	2780531	2781381	+
Mur82C	3R	4541356	4543215	1											Mur82C	Dmau_3R	322274	324006	+
CG8738	2R	8696428	8698583	1	Dsim\GD10592	Scf_2R	5398586	5400806	1	Dsec\GM21057	scaffold_1	2228389	2230277	1	CG8738	Dmau_2R	3106059	3108017	+
CG11663	X	894482	895200	1
CG10185	3R	16060589	16067594	-1	Dsim\GD20309	Scf_3R	9357431	9365102	1	Dsec\GM25736	scaffold_0	10066185	10073044	1	CG10185	Dmau_3R	9193543	9200380	+
fa2h	2R	7446189	7451553	-1	Dsim\GD10257	Scf_2R	4154956	4160316	-1	Dsec\GM20795	scaffold_1	978352	981624	-1	fa2h	Dmau_2R	1892875	1896172	+
CG6695	3R	24655160	24659379	1	Dsim\GD21117	Scf_ICT21	3563	7802	-1	Dsec\GM26616	scaffold_0	20815439	20819333	1	CG6695	Dmau_3R	19733459	19737332	-
CG32855	3R	16078980	16080992	-1											CG32855	Dmau_3R	9180414	9182072	+
CG3527	X	4551973	4553006	1	Dsim\GD16696	Scf_X	4138094	4139148	1	Dsec\GM12351	scaffold_4	2281033	2281885	-1	CG3527	Dmau_X	4063374	4064199	+
tomboy40	2R	6225634	6226884	1	Dsim\GD10402	Scf_2R	3111051	3112386	1	Dsec\GM16540	scaffold_26	755954	756976	1	tomboy40	Dmau_2R	929696	930718	+
YL-1	2L	10970443	10972093	1	Dsim\GD23743	Scf_2L	10627479	10628888	1	Dsec\GM18769	scaffold_3	6371412	6372651	1	YL-1	Dmau_2L	10545706	10546949	+
PGRP-LD	3L	5780051	5784685	1	Dsim\GD13901	Scf_3L	5686057	5690644	1	Dsec\GM14721	scaffold_2	5711706	5713200	1	PGRP-LD	Dmau_3L	5517448	5518826	+
CG5278	3R	22558342	22562572	-1
CG7742	2L	5212395	5215081	-1	Dsim\GD22661	Scf_2L	5017029	5019774	-1	Dsec\GM18033	scaffold_5	3293493	3295588	-1	CG7742	Dmau_2L	4980529	4982627	+
ru	3L	1370628	1387437	1	Dsim\GD13615	Scf_3L	1296703	1313058	1	Dsec\GM14406	scaffold_2	1427117	1429633	1	ru	Dmau_3L	1287434	1289988	+
CG42578	X	20446371	20446703	1
Itgbetanu	2L	21053033	21058044	1
CG33632	2R	12522023	12522731	1	Dsim\GD10896	Scf_2R	9118260	9118975	1						CG33632	Dmau_2R	6786535	6787250	+
CG31418	3R	17283795	17284511	1	Dsim\GD19149	Scf_3R	8148392	8149186	-1	Dsec\GM15220	scaffold_12	1035815	1036456	-1	CG31418	Dmau_3R	7989604	7990281	+
Zip42C.2	2R	6718196	6719533	-1	Dsim\GD15477	Scf_2R	3468162	3469383	-1	Dsec\GM20856	scaffold_1	270293	271228	-1	Zip42C.2	Dmau_2R	1215269	1216261	+
CG13082	2L	19538425	19539740	1	Dsim\GD24220	Scf_2L	19033150	19034605	1	Dsec\GM17362	scaffold_7	3153155	3154288	1	CG13082	Dmau_2L	18751149	18752282	+
Gr47a	2R	10362185	10363584	1	Dsim\GD10737	Scf_2R	7016773	7020041	1	Dsec\GM21212	scaffold_1	3856622	3857859	1	Gr47a	Dmau_2R	4710118	4711355	+
CG2794	2L	564163	566472	1	Dsim\GD23033	Scf_2L	537630	539934	1	Dsec\GM16751	scaffold_14	546894	548996	1	CG2794	Dmau_2L	533653	535755	+
hrg	2R	19663919	19669832	-1	Dsim\GD25311	Scf_2R	16153835	16159647	-1	Dsec\GM19819	scaffold_1	13066481	13070478	-1	hrg	Dmau_2R	13679879	13682611	+
qkr54B	2R	17469624	17475129	1	Dsim\GD11271	Scf_2R	14009205	14012835	1	Dsec\GM24584	scaffold_14040	304	907	1	qkr54B	Dmau_2R	11552229	11554775	+
Vha16-1	2R	6625242	6633090	-1	Dsim\GD10321	Scf_2R	3376513	3384230	-1	Dsec\GM20869	scaffold_1	178626	183271	-1	Vha16-1	Dmau_2R	1126598	1131247	+
raw	2L	8709880	8740660	-1	Dsim\GD22386	Scf_2L	8424233	8446872	-1	Dsec\GM12748	scaffold_3	4192080	4213835	-1	raw	Dmau_2L	8372637	8389123	+
alph	3R	29591831	29617157	1	Dsim\GD21442	Scf_3R	24776657	24802023	1	Dsec\GM12795	scaffold_4	4276244	4286775	1	alph	Dmau_3R	24484840	24495986	+
CG3769	2L	9435399	9436842	1	Dsim\GD23605	Scf_2L	9125280	9126948	1	Dsec\GM17453	scaffold_3	4889303	4890658	1	CG3769	Dmau_2L	9072914	9074240	+
Jon99Cii	3R	29923754	29924615	-1	Dsim\GD11483	Scf_3R	25632044	25632939	-1	Dsec\GM12839	scaffold_4	4595821	4596620	1
C1GalTA	2L	8943455	8951216	-1	Dsim\GD22375	Scf_2L	8649909	8657261	-1	Dsec\GM12650	scaffold_3	4418316	4419828	-1	C1GalTA	Dmau_2L	8598056	8599358	+
Or59b	2R	23470165	23471775	-1	Dsim\GD25045	Scf_2R	19829992	19832561	-1	Dsec\GM15541	scaffold_9	2646888	2648192	-1	Or59b	Dmau_2R	17340821	17342129	+
CG42498	3R	26057347	26058223	-1											CG42498	Dmau_3R	21101859	21102253	+
antdh	X	11168030	11169058	-1
Ada1-2	2L	11992902	11994054	1	Dsim\GD23805	Scf_2L	11625597	11626747	1	Dsec\GM26692	scaffold_16	192473	193463	1	Ada1-2	Dmau_2L	11539100	11540090	+
CG32988	2L	8864864	8865692	1	Dsim\GD23569	Scf_2L	8570726	8571564	1	Dsec\GM17195	scaffold_3	4339030	4339785	1	CG32988	Dmau_2L	8518608	8519358	+
CG7229	2R	19259909	19262294	1
CG10420	3R	25233636	25235529	-1	Dsim\GD18223	Scf_3R	20568580	20570392	-1	Dsec\GM17740	scaffold_33	320380	321732	-1	CG10420	Dmau_3R	20301796	20303148	+
CG17169	X	23084672	23085536	1	Dsim\GD15470	Scf_2R	3187390	3188977	-1	Dsec\GM13281	scaffold_109	31161	32697	-1
Akt1	3R	16099228	16105670	1	Dsim\GD19074	Scf_3R	9320831	9326155	-1	Dsec\GM24284	scaffold_0	10030938	10032874	-1	Akt1	Dmau_3R	9158388	9160570	+
Gal	2L	6003574	6006827	-1	Dsim\GD22613	Scf_2L	5799153	5802321	-1	Dsec\GM17976	scaffold_5	4074851	4077756	-1	Gal	Dmau_2L	5756201	5759064	+
CG2316	4	184076	193829	-1	Dsim\GD24389	Scf_4	155996	164893	-1	Dsec\GM23229	scaffold_52	154061	158053	-1	CG2316	Dmau_4	146478	150533	+
CG12374	2R	12762113	12763825	1	Dsim\GD10919	Scf_2R	9351007	9352662	1	Dsec\GM21424	scaffold_1	6187664	6189196	1	CG12374	Dmau_2R	7018629	7020161	+
Zpr1	X	9160124	9162090	-1	Dsim\GD16079	Scf_X	8588783	8590501	-1	Dsec\GM13673	scaffold_34	413867	415362	-1	Zpr1	Dmau_X	8424465	8425960	+
Acp95EF	3R	24228975	24229279	1	Dsim\GD21079	Scf_3R	19586424	19586752	1	Dsec\GM26575	scaffold_0	20387054	20387279	1	Acp95EF	Dmau_3R	19311623	19311848	+
CG30424	2R	24965275	24967298	-1						Dsec\GM11773	scaffold_23	705345	711800	-1	CG30424	Dmau_2R	18775781	18777054	+
CG31278	3R	10707398	10708340	-1	Dsim\GD20713	Scf_3R	14541209	14542200	1	Dsec\GM26160	scaffold_0	15407802	15408589	1	CG31278	Dmau_3R	14351722	14352509	+
karr	X	20110110	20110575	-1	Dsim\GD24880	Scf_X	18862618	18863171	1	Dsec\GM22694	scaffold_8	2213898	2214242	-1
Rab2	2R	6696739	6699469	1	Dsim\GD10420	Scf_2R	3446664	3449028	1	Dsec\GM20894	scaffold_1	248727	250457	1	Rab2	Dmau_2R	1193534	1195194	+
Muc18B	X	19215515	19216660	1	Dsim\GD17435	Scf_X	17998719	18000441	1	Dsec\GM22951	scaffold_8	1404236	1405021	1	Muc18B	Dmau_X	17922477	17923096	+
CG13041	3L	16318954	16319526	-1	Dsim\GD12487	Scf_3L	15926573	15927578	-1	Dsec\GM25617	scaffold_0	8406770	8407241	1	CG13041	Dmau_3L	15661367	15661769	+
CG12684	X	4570991	4571929	-1	Dsim\GD16290	Scf_X	4156995	4158035	-1	Dsec\GM12681	scaffold_4	2262321	2263067	1	CG12684	Dmau_X	4082310	4083023	+
CG18003	2R	10883547	10884936	1	Dsim\GD10762	Scf_2R	7510645	7512314	1	Dsec\GM21244	scaffold_1	4357628	4358794	1	CG18003	Dmau_2R	5197814	5198980	+
Roe1	2R	13554077	13555606	1	Dsim\GD10974	Scf_2R	10104715	10105915	1	Dsec\GM21478	scaffold_1	6960128	6961164	1	Roe1	Dmau_2R	7767856	7768892	+
CG15879	3L	2167550	2169108	-1	Dsim\GD13410	Scf_3L	2065279	2066890	-1	Dsec\GM14138	scaffold_2	2195667	2196673	-1	CG15879	Dmau_3L	2041693	2042885	+
ksr	3R	5478390	5483906	-1	Dsim\ksr	Scf_3R	1199949	1203780	-1	Dsec\GM10629	scaffold_6	1420708	1423622	-1	ksr	Dmau_3R	1183677	1186583	+
Rae1	2R	21658770	21660007	-1	Dsim\GD25180	Scf_2R	18056088	18057335	-1	Dsec\GM15702	scaffold_9	872251	873340	-1	Rae1	Dmau_2R	15576288	15577377	+
CG8837	2L	3320245	3323141	1	Dsim\GD23219	Scf_2L	3180140	3183023	1	Dsec\GM18406	scaffold_5	1463188	1465636	1	CG8837	Dmau_2L	3155617	3158041	+
dj-1beta	3R	30807117	30807978	1	Dsim\GD21547	Scf_3R	25944471	25945349	1	Dsec\GM12907	scaffold_4	5459191	5459884	1	dj-1beta	Dmau_3R	25645071	25645821	+
CG32219	3L	19950023	19951135	-1	Dsim\GD17217	Scf_3L	19434664	19435718	-1	Dsec\GM15297	scaffold_29	588362	588928	-1	CG32219	Dmau_3L	19070807	19071375	+
lig	2R	8067977	8078815	1	Dsim\GD15363	Scf_2R	4778192	4788999	1	Dsec\GM21002	scaffold_1	1601198	1609591	1	lig	Dmau_2R	2492276	2500456	+
CG13375	X	283186	294962	-1	Dsim\GD16484	Scf_X	118907	240784	-1	Dsec\GM19045	scaffold_10	53702	58826	-1	CG13375	Dmau_X	111180	115598	+
CG2991	2L	2857164	2868548	1	Dsim\GD23189	Scf_2L	2737809	2748528	1	Dsec\GM18374	scaffold_5	1024065	1026668	1	CG2991	Dmau_2L	2721888	2724576	+
Snapin	2L	2758427	2759677	-1	Dsim\GD22807	Scf_2L	2644141	2647168	-1	Dsec\GM18203	scaffold_5	925324	925728	-1	Snapin	Dmau_2L	2622954	2623358	+
Skp2	3R	4334879	4337674	-1	Dsim\GD19685	Scf_3R	142891	145153	-1	Dsec\GM10708	scaffold_6	278619	280674	-1	Skp2	Dmau_3R	143458	145514	+
CG43181	X	350566	351133	1	Dsim\GD28905	Scf_X	172961	173547	1						CG43181	Dmau_X	164254	164640	+
Srp19	3L	7347310	7348034	-1	Dsim\GD13067	Scf_3L	7207045	7207772	-1	Dsec\GM13769	scaffold_2	7265219	7265773	-1	Srp19	Dmau_3L	7017923	7018477	+
GAA1	X	5870841	5873357	-1	Dsim\GD16225	Scf_X	5395683	5398208	-1	Dsec\GM12612	scaffold_4	991013	993170	1	GAA1	Dmau_X	5301821	5303974	+
osp	2L	14599196	14689340	-1	Dsim\GD21995	Scf_2L	14138834	14217803	-1	Dsec\GM14739	scaffold_3	874421	963618	-1	osp	Dmau_2L	14042101	14053216	+
CG7298	3L	20202070	20203687	-1	Dsim\GD12213	Scf_3L	19683233	19684856	-1	Dsec\GM22242	scaffold_11	105431	106761	-1	CG7298	Dmau_3L	19313209	19314443	+
ft	2L	4198404	4221796	-1	Dsim\GD22718	Scf_2L	4045118	4087996	-1	Dsec\GM18102	scaffold_5	2302727	2315218	-1	ft	Dmau_2L	4019717	4038650	+
CG4701	2L	14765908	14767225	1
CycD	X	15906822	15909676	-1	Dsim\GD15773	Scf_X	14958125	14961061	-1	Dsec\GM22512	scaffold_37	377530	379582	-1	CycD	Dmau_X	14766133	14768168	+
CG15429	2L	4352975	4354034	1	Dsim\GD23278	Scf_2L	4199459	4200399	1	Dsec\GM18464	scaffold_5	2450346	2451111	1	CG15429	Dmau_2L	4173078	4173838	+
CG10195	2L	19482232	19484705	-1	Dsim\GD21756	Scf_2L	18978322	18980277	-1	Dsec\GM17007	scaffold_7	3098313	3099686	-1	CG10195	Dmau_2L	18696161	18697597	+
CG7011	3L	15160876	15163628	-1	Dsim\GD12569	Scf_3L	14791555	14794325	-1	Dsec\GM24497	scaffold_0	7266749	7269275	-1	CG7011	Dmau_3L	14533851	14536362	+
sktl	2R	20827282	20836028	-1	Dsim\GD25249	Scf_2R	17228207	17236820	-1	Dsec\GM15773	scaffold_9	41288	43666	-1	sktl	Dmau_2R	14752393	14754765	+
CG6962	3R	11879702	11882534	-1	Dsim\GD20627	Scf_3R	13397162	13400094	1	Dsec\GM26063	scaffold_0	14261740	14264388	1	CG6962	Dmau_3R	13214235	13216881	+
CG43896	3L	11976111	11983764	1	Dsim\GD14347	Scf_3L	11668557	11676174	1	Dsec\GM25315	scaffold_0	4155541	4160112	1	CG43896	Dmau_3L	11436527	11443824	+
CG7054	3R	22464985	22465938	1	Dsim\GD20953	Scf_3R	17813970	17814948	1	Dsec\GM26436	scaffold_0	18644362	18644962	1	CG7054	Dmau_3R	17585108	17585708	+
Pex14	3L	20778799	20780378	1	Dsim\GD14907	Scf_3L	20231840	20233482	1	Dsec\GM22319	scaffold_11	671185	672357	1	Pex14	Dmau_3L	19854419	19855591	+
t	X	9217655	9223257	-1	Dsim\GD16075	Scf_X	8646011	8651321	-1	Dsec\GM22371	scaffold_68	743	5176	-1	t	Dmau_X	8480366	8485203	+
kto	3L	19836614	19844944	1	Dsim\GD14832	Scf_3L	19330655	19338993	1	Dsec\GM19665	scaffold_29	483526	491684	1	kto	Dmau_3L	18969396	18977607	+
CG42733	2R	10356171	10356800	-1	Dsim\GD26835	Scf_2R	7012092	7012737	-1						CG42733	Dmau_2R	4704012	4704404	+
Spn77Ba	3L	20317190	20320116	1	Dsim\GD14873	Scf_3L	19791764	19794429	1	Dsec\GM22272	scaffold_11	219146	221258	1	Spn77Ba	Dmau_3L	19421503	19423623	+
CG32117	3L	12902925	12903711	-1	Dsim\GD12689	Scf_3L	12595236	12596041	-1	Dsec\GM24622	scaffold_0	5077533	5078162	-1	CG32117	Dmau_3L	12358385	12359031	+
NijA	3L	10694360	10696877	-1	Dsim\GD12851	Scf_3L	10434162	10436580	-1	Dsec\GM24800	scaffold_0	2908918	2910787	-1	NijA	Dmau_3L	10214949	10216948	+
CG33258	3L	16082551	16083638	1	Dsim\GD14593	Scf_3L	15694307	15695372	1	Dsec\GM25581	scaffold_0	8175362	8176236	1	CG33258	Dmau_3L	15430253	15431128	+
mRpS26	3L	18106579	18107499	1	Dsim\GD28342	Scf_3L	17654192	17655112	1	Dsec\GM14962	scaffold_19	95555	96330	1	mRpS26	Dmau_3L	17351694	17352469	+
CG32820	X	21611797	21615239	-1	Dsim\GD15491	Scf_X	20167594	20169858	-1	Dsec\GM13535	scaffold_178	8731	11437	-1
Sac1	3L	1247817	1250451	1	Dsim\GD13597	Scf_3L	1171623	1174269	1	Dsec\GM14388	scaffold_2	1290486	1292659	1
CG5089	2R	16598748	16600411	1	Dsim\GD27788	Scf_2R	13158372	13160075	1	Dsec\GM21712	scaffold_1	9984547	9985833	1	CG5089	Dmau_2R	10704385	10705689	+
cid	2R	13485617	13486631	1	Dsim\cid	Scf_2R	10036480	10037870	1	Dsec\cid	scaffold_1	6892478	6893155	1	cid	Dmau_2R	7699853	7700530	+
l(1)G0156	X	19518428	19521810	-1
CG1077	3R	6167483	6170309	1	Dsim\GD19840	Scf_3R	1899005	1901954	1	Dsec\GM10857	scaffold_6	2085369	2088200	1	CG1077	Dmau_3R	1843635	1846466	+
CG8483	3R	13208754	13214465	-1	Dsim\GD20518	Scf_3R	12132550	12138150	1	Dsec\GM25958	scaffold_0	12964812	12969814	1	CG8483	Dmau_3R	11958940	11963857	+
robl62A	3L	1477619	1478369	1
CG13127	2L	10026676	10029298	1	Dsim\GD23650	Scf_2L	9717167	9719755	1	Dsec\GM17871	scaffold_3	5466449	5468641	1	CG13127	Dmau_2L	9643993	9645141	+
His4:CG33903	2L	21439589	21440001	-1	Dsim\GD18968	Scf_3R	10757882	10758774	-1	Dsec\GM19606	scaffold_12634	407	700	1
Asx	2R	14503958	14512493	1	Dsim\GD11058	Scf_2R	11090197	11098176	1	Dsec\GM21552	scaffold_1	7903272	7907956	1	Asx	Dmau_2R	8666652	8672670	+
CG34133	3R	29869365	29875159	1	Dsim\GD21477	Scf_3R	25050403	25056206	1	Dsec\GM12834	scaffold_4	4548246	4551231	1	CG34133	Dmau_3R	24756723	24761562	+
TpnC47D	2R	11273845	11275286	-1	Dsim\TpnC47D	Scf_2R	7881572	7882907	-1	Dsec\GM20459	scaffold_1	4729753	4730803	-1	TpnC47D	Dmau_2R	5561103	5562047	+
Vap-33B	3L	5923862	5930120	1
Nf-YC	X	6818178	6820919	-1	Dsim\GD27634	Scf_X	6303384	6306131	-1	Dsec\GM12548	scaffold_4	81352	83398	1	Nf-YC	Dmau_X	6181289	6183329	+
Gtp-bp	X	11126877	11129087	-1	Dsim\GD28654	Scf_X	10457670	10459852	-1						Gtp-bp	Dmau_X	10282766	10284745	+
CG15084	2R	18850844	18851963	1	Dsim\GD11416	Scf_2R	15341369	15342651	1	Dsec\GM21922	scaffold_1	12246755	12247705	1	CG15084	Dmau_2R	12875929	12876879	+
CG16888	2L	13812700	13813256	-1	Dsim\GD22042	Scf_2L	13358996	13359649	-1	Dsec\GM15116	scaffold_3	78226	78732	-1	CG16888	Dmau_2L	13268680	13269186	+
CG9642	2R	17046839	17048794	1
Lcch3	X	15925105	15928529	1	Dsim\GD24824	Scf_X	14976317	14979661	1	Dsec\GM22599	scaffold_37	396367	398578	1	Lcch3	Dmau_X	14784978	14787186	+
CG7338	3L	21335215	21338232	1
Blos4	3L	10879085	10880188	1	Dsim\GD17633	Scf_3L	10618152	10619555	1	Dsec\GM25230	scaffold_0	3092014	3092577	1	Blos4	Dmau_3L	10398776	10399339	+
mael	3L	22721203	22726234	1	Dsim\GD15049	Scf_3L	22119882	22121919	1	Dsec\GM22468	scaffold_11	2638282	2646970	1	mael	Dmau_3L	21730680	21732307	+
alphaTry	2R	11344260	11345119	-1	Dsim\GD29555	Scf_2R	7947366	7948292	-1	Dsec\GM20441	scaffold_1	4795733	4796503	-1	alphaTry	Dmau_2R	5632078	5632846	-
CG33461	2R	15695386	15696478	1
CG4424	3R	20026487	20028040	-1	Dsim\GD20085	Scf_3R	5430959	5432462	1	Dsec\GM17699	scaffold_58	94496	95802	1	CG4424	Dmau_3R	5321871	5323178	+
CG8335	2R	6200853	6201956	1
CR33491	X	20178755	20179597	-1
Lerp	3R	26842462	26863130	-1	Dsim\GD18117	Scf_3R	22127752	22148451	-1	Dsec\GM10163	scaffold_13	1442327	1461924	-1	Lerp	Dmau_3R	21846981	21866548	+
Akap200	2L	8415690	8431297	1
CG12237	X	19641191	19642869	-1	Dsim\GD24455	Scf_X	18417032	18419167	-1	Dsec\GM22723	scaffold_8	1816102	1817022	-1	CG12237	Dmau_X	18333707	18334600	+
CG11191	2R	8000490	8002120	-1	Dsim\GD10198	Scf_2R	4711900	4713427	-1	Dsec\GM20732	scaffold_1	1525711	1526330	-1	CG11191	Dmau_2R	2424858	2425944	+
CG17294	2L	8377035	8378206	1	Dsim\GD23533	Scf_2L	8104120	8105321	1	Dsec\GM16922	scaffold_3	3873683	3874610	1	CG17294	Dmau_2L	8055234	8056161	+
Cpr72Ec	3L	16365894	16367340	-1	Dsim\GD12478	Scf_3L	15973380	15974855	-1	Dsec\GM24409	scaffold_0	8453870	8455186	-1	Cpr72Ec	Dmau_3L	15708494	15709650	+
CG11388	2R	24022343	24023981	1	Dsim\GD29218	Scf_2R	20365850	20367491	1	Dsec\GM16083	scaffold_9	3193949	3195396	1	CG11388	Dmau_2R	17873592	17874968	+
up	X	13593474	13602578	-1	Dsim\up	Scf_X	12812997	12821937	-1	Dsec\GM17606	scaffold_20	120109	126163	-1	up	Dmau_X	12600671	12606830	+
Cpr67Fa1	3L	10889990	10890700	1	Dsim\GD14266	Scf_3L	10630169	10632752	1	Dsec\GM25233	scaffold_0	3104226	3104904	1
CG7368	3L	11597202	11605374	1	Dsim\GD14315	Scf_3L	11307746	11313412	1	Dsec\GM25284	scaffold_0	3785067	3786799	1	CG7368	Dmau_3L	11084266	11085996	+
CG14657	3R	4817980	4821432	-1	Dsim\GD19651	Scf_3R	578240	581672	-1	Dsec\GM10676	scaffold_6	749748	751521	-1	CG14657	Dmau_3R	563811	565564	+
CG43194	3R	18564264	18565173	-1
Rab7	3R	23993008	23995452	1	Dsim\GD21052	Scf_3R	19355864	19358314	1	Dsec\GM26547	scaffold_0	20161262	20162012	1	Rab7	Dmau_3R	19084569	19085317	+
CG33766	3L	22645627	22646236	1	Dsim\GD15036	Scf_3L	22039026	22039621	1	Dsec\GM22455	scaffold_11	2555187	2555782	1	CG33766	Dmau_3L	21652366	21652961	+
CG12655	X	19958393	19959403	-1	Dsim\GD18725	Scf_X	18669785	18681026	-1	Dsec\GM22700	scaffold_8	2075717	2076702	-1	CG12655	Dmau_X	18581665	18582574	+
CG32817	X	479066	480166	1	Dsim\GD16506	Scf_X	295318	296153	1	Dsec\GM16243	scaffold_1803	2589	3041	-1	CG32817	Dmau_X	285931	287258	+
CG18367	2R	19636660	19637400	1	Dsim\GD11469	Scf_2R	16126196	16126996	1	Dsec\GM21974	scaffold_1	13038802	13039464	1	CG18367	Dmau_2R	13650848	13651500	+
CG43894	3L	12889770	12892162	1	Dsim\GD29380	Scf_3L	12581794	12583638	1	Dsec\GM25380	scaffold_0	5064668	5065131	1	CG43894	Dmau_3L	12345449	12346294	+
Fis1	2R	5603587	5604834	-1	Dsim\GD10356	Scf_2R	2450833	2452113	-1	Dsec\GM16506	scaffold_26	121053	129502	-1
CG10907	3L	11793514	11795418	1	Dsim\GD14329	Scf_3L	11488539	11490414	1	Dsec\GM25298	scaffold_0	3972578	3974377	1	CG10907	Dmau_3L	11260728	11262541	+
sea	3R	11559896	11567054	-1	Dsim\GD20656	Scf_3R	13710919	13714941	1	Dsec\GM26094	scaffold_0	14578196	14579208	1	sea	Dmau_3R	13529039	13530051	+
CG43707	2L	3757256	3769525	1	Dsim\GD23253	Scf_2L	3610128	3621675	1	Dsec\GM18434	scaffold_5	1855211	1871272	1	CG43707	Dmau_2L	3585114	3595422	+
Orc6	2R	9845458	9846485	-1	Dsim\GD10047	Scf_2R	6511123	6512186	-1	Dsec\GM20574	scaffold_1	3343599	3343832	-1	Orc6	Dmau_2R	4209274	4210103	+
CG9715	3L	16845386	16852350	1
CG30284	2R	21650820	21651999	-1	Dsim\GD22763	Scf_2L	3218325	3233206	-1	Dsec\GM15703	scaffold_9	864311	865381	-1	CG30284	Dmau_2R	15568316	15569380	+
sqh	X	6223061	6225140	-1	Dsim\sqh	Scf_X	5738112	5740157	-1	Dsec\GM12587	scaffold_4	651773	652361	1	sqh	Dmau_X	5633089	5633677	+
CG4619	2L	9938863	9943058	1	Dsim\GD23642	Scf_2L	9636855	9638882	1	Dsec\GM17821	scaffold_3	5385762	5387533	1	CG4619	Dmau_2L	9563934	9565705	+
CG13700	3L	18298742	18301260	-1	Dsim\GD12348	Scf_3L	17846526	17849065	-1	Dsec\GM14946	scaffold_19	287678	289917	-1	CG13700	Dmau_3L	17543879	17546169	+
CG31463	3R	8292335	8293609	1	Dsim\GD18533	Scf_3R	16847395	16848933	-1	Dsec\GM23719	scaffold_0	17709851	17711002	-1	CG31463	Dmau_3R	16651547	16652698	+
Gr9a	X	10061627	10062785	1	Dsim\GD16971	Scf_X	9481645	9483328	1	Dsec\GM11405	scaffold_15	671877	673030	1	Gr9a	Dmau_X	9293367	9294525	+
Or85f	3R	9398190	9399551	1	Dsim\GD18611	Scf_3R	15801138	15803824	-1	Dsec\GM23799	scaffold_0	16670389	16671752	-1	Or85f	Dmau_3R	15611696	15613056	+
CG42371	2L	2216503	2217246	-1	Dsim\GD22862	Scf_2L	2109691	2110284	-1	Dsec\GM18253	scaffold_5	391359	391689	-1	CG42371	Dmau_2L	2087647	2087963	+
MED19	3L	17843725	17846501	-1	Dsim\GD12367	Scf_3L	17416654	17419004	-1	Dsec\GM24298	scaffold_0	9883070	9885108	-1	MED19	Dmau_3L	17117439	17119292	+
Magi	2R	21129463	21142261	-1	Dsim\GD25223	Scf_2R	17529443	17542224	-1	Dsec\GM15748	scaffold_9	346243	355214	-1	Magi	Dmau_2R	15052089	15061127	+
CG6018	2R	22550094	22552113	1
CG10055	3R	7184101	7186673	-1	Dsim\GD19497	Scf_3R	2932705	2935263	-1	Dsec\GM10501	scaffold_6	3102510	3104462	-1	CG10055	Dmau_3R	2842210	2844170	+
GXIVsPLA2	3L	15955096	15956465	1	Dsim\GD14577	Scf_3L	15566611	15567867	1	Dsec\GM25562	scaffold_0	8048413	8049246	1	GXIVsPLA2	Dmau_3L	15303291	15304124	+
Spn28Da	2L	7887693	7889129	-1	Dsim\GD22458	Scf_2L	7633822	7635234	-1	Dsec\GM13262	scaffold_3	3402637	3403770	-1	Spn28Da	Dmau_2L	7586071	7587311	+
brn	X	4104342	4105791	1	Dsim\GD16669	Scf_X	3685013	3686450	1	Dsec\GM12324	scaffold_4	2722303	2723280	-1	brn	Dmau_X	3638602	3639579	+
CG15458	X	20413652	20414199	-1	Dsim\GD24443	Scf_X	19030593	19031133	-1	Dsec\GM22674	scaffold_8	2478184	2478437	-1	CG15458	Dmau_X	18955655	18955908	+
lid	2L	5989400	5999501	-1	Dsim\GD22616	Scf_2L	5785265	5794992	-1	Dsec\GM17977	scaffold_5	4062078	4067535	-1	lid	Dmau_2L	5743069	5748890	+
Cht12	2R	21063178	21064986	-1	Dsim\GD25229	Scf_2R	17463504	17467399	-1	Dsec\GM15756	scaffold_9	281005	282584	-1	Cht12	Dmau_2R	14986134	14987709	+
CG33775	2R	12564224	12564901	-1	Dsim\GD25831	Scf_2R	9159643	9161182	-1	Dsec\GM20352	scaffold_1	5998123	5998804	-1	CG33775	Dmau_2R	6828514	6829190	+
Eip93F	3R	21949114	22014539	1	Dsim\GD20912	Scf_3R	17311701	17370651	1	Dsec\GM26391	scaffold_0	18172514	18202679	1	Eip93F	Dmau_3R	17112605	17143006	+
CG13365	X	620717	621215	-1	Dsim\GD16471	Scf_X	426267	427496	-1	Dsec\GM19033	scaffold_10	361173	361517	-1	CG13365	Dmau_X	417306	417649	+
CG30427	2R	24928747	24937477	-1	Dsim\GD24908	Scf_2R	21234114	21243030	-1	Dsec\GM11778	scaffold_23	673456	679421	-1	CG30427	Dmau_2R	18739060	18744981	+
cmet	2L	11261026	11269002	-1	Dsim\GD23772	Scf_2L	10923805	10931793	1	Dsec\GM18973	scaffold_3	6666626	6674334	1	cmet	Dmau_2L	10832963	10840040	+
CG43668	2R	20791462	20792192	-1	Dsim\GD25251	Scf_2R	17192225	17193830	-1	Dsec\GM15775	scaffold_9	4731	5335	-1	CG43668	Dmau_2R	14716270	14716868	+
CG13558	2R	23499651	23500702	1	Dsim\GD11769	Scf_2R	19860628	19861460	1	Dsec\GM16018	scaffold_9	2675667	2676751	1	CG13558	Dmau_2R	17369991	17370578	+
CG15863	2R	9959119	9959732	-1	Dsim\GD10036	Scf_2R	6623082	6623711	-1	Dsec\GM26744	scaffold_14512	510	808	-1	CG15863	Dmau_2R	4320969	4321419	+
CG6470	X	18512829	18514867	-1	Dsim\GD15627	Scf_X	17488106	17490159	-1	Dsec\GM22802	scaffold_8	713493	715004	-1	CG6470	Dmau_X	17252908	17254237	+
CG34448	2L	2416792	2417965	-1	Dsim\GD22835	Scf_2L	2309825	2311011	-1	Dsec\GM18228	scaffold_5	590170	591325	-1	CG34448	Dmau_2L	2286906	2288061	+
ro	3R	26876771	26881171	-1	Dsim\GD18113	Scf_3R	22162771	22167140	-1	Dsec\GM10159	scaffold_13	1475981	1480147	-1	ro	Dmau_3R	21881017	21885361	+
TwdlY	X	16734947	16735980	1	Dsim\GD17303	Scf_X	15714961	15720245	1	Dsec\GM13463	scaffold_17	452971	453714	1	TwdlY	Dmau_X	15515970	15516658	+
CG14749	2R	8627900	8630186	1											CG14749	Dmau_2R	3037040	3039079	+
CG8854	2R	12224461	12229310	-1	Dsim\GD15235	Scf_2R	8817905	8823100	-1	Dsec\GM20373	scaffold_1	5660869	5662427	-1	CG8854	Dmau_2R	6492806	6494348	+
GlcAT-I	X	4131211	4132833	1	Dsim\GD16673	Scf_X	3711505	3713095	1	Dsec\GM12329	scaffold_4	2696086	2696487	-1	GlcAT-I	Dmau_X	3664987	3665959	+
Hsp60D	2L	13447538	13449497	-1	Dsim\GD22056	Scf_2L	13022280	13024156	-1	Dsec\GM25499	scaffold_16	1601099	1602067	-1	Hsp60D	Dmau_2L	12933992	12935668	+
CG5265	3R	17138999	17141168	1	Dsim\GD19548	Scf_3R	2097939	2100772	-1	Dsec\GM15216	scaffold_12	1188802	1190733	-1	CG5265	Dmau_3R	8132781	8134712	+
ppan	3R	21116254	21117899	1	Dsim\GD19398	Scf_3R	4359001	4360649	-1	Dsec\GM26757	scaffold_1611	233	992	-1	ppan	Dmau_3R	4254719	4256268	+
CG12182	3L	2595842	2599579	-1
CG42709	3L	12790192	12796084	1	Dsim\GD14405	Scf_3L	12485282	12491231	1	Dsec\GM25372	scaffold_0	4969458	4973549	1	CG42709	Dmau_3L	12250746	12254718	+
mkg-p	3L	8402168	8405277	-1	Dsim\GD28144	Scf_3L	8199788	8204260	-1	Dsec\mkg-p	scaffold_0	691618	693649	-1	mkg-p	Dmau_3L	8006357	8009456	+
brk	X	7307939	7311132	1	Dsim\GD16839	Scf_X	6770677	6773867	1	Dsec\GM17513	scaffold_24	411409	413487	1	brk	Dmau_X	6643939	6645937	+
CG30183	2R	23690247	23697824	-1	Dsim\GD25024	Scf_2R	20041907	20049414	-1	Dsec\GM15520	scaffold_9	2857579	2863542	-1	CG30183	Dmau_2R	17551808	17558506	+
CG12259	3R	27919844	27921089	-1	Dsim\GD18051	Scf_3R	23147397	23148721	-1	Dsec\GM16314	scaffold_22	371141	372220	-1	CG12259	Dmau_3R	22862796	22863878	+
CG33679	2L	15058303	15059120	1	Dsim\GD23991	Scf_2L	14570944	14572201	1	Dsec\GM15905	scaffold_3	1320501	1321079	1	CG33679	Dmau_2L	14473500	14474078	+
CG13282	2L	16832065	16834502	-1	Dsim\GD21893	Scf_2L	16360002	16361868	-1	Dsec\GM17154	scaffold_7	477798	479431	-1	CG13282	Dmau_2L	16132476	16134103	+
His4:CG33871	2L	21529242	21529769	-1	Dsim\GD18968	Scf_3R	10757882	10758774	-1	Dsec\GM19606	scaffold_12634	407	700	1
CG43198	X	7452694	7453336	-1	Dsim\GD26918	Scf_X	6914890	6915594	-1						CG43198	Dmau_X	6786896	6787475	+
GIIIspla2	X	8157628	8159348	1	Dsim\GD24767	Scf_X	7613409	7614868	1	Dsec\GM11233	scaffold_44	138034	138690	1	GIIIspla2	Dmau_X	7464420	7465076	+
CG15399	2L	2770884	2771776	-1	Dsim\GD22803	Scf_2L	2658225	2659294	-1	Dsec\GM18198	scaffold_5	936922	937720	-1	CG15399	Dmau_2L	2634566	2635364	+
CG40439	2L	22797519	22798276	-1	Dsim\GD27686	Scf_2L	22424924	22425705	-1						CG40439	Dmau_2L	21055279	21055845	+
Vps36	3L	13511646	13513112	-1	Dsim\GD12653	Scf_3L	13208391	13210035	-1	Dsec\GM24585	scaffold_0	5680256	5681576	-1	Vps36	Dmau_3L	12956729	12958042	+
CG3566	X	6274972	6276724	-1	Dsim\GD16200	Scf_X	5789899	5791692	-1	Dsec\GM12584	scaffold_4	594816	600760	1	CG3566	Dmau_X	5684476	5686072	+
IntS14	2L	1164443	1166425	1	Dsim\GD23076	Scf_2L	1111721	1113818	1	Dsec\GM16800	scaffold_14	1124624	1126445	1	IntS14	Dmau_2L	1105359	1107180	+
CG6812	3L	19063165	19066151	1
nht	2L	15317954	15318901	-1	Dsim\GD21960	Scf_2L	14917172	14918148	-1	Dsec\GM14423	scaffold_3	1579663	1581459	-1	nht	Dmau_2L	14733163	14733893	+
CG31882	2L	9624452	9625285	-1	Dsim\GD22346	Scf_2L	9306934	9307770	-1	Dsec\GM12363	scaffold_3	5071344	5071709	-1
Actbeta	4	1077331	1084796	-1	Dsim\GD29153	Scf_4	881350	886774	-1	Dsec\GM13010	scaffold_40	144817	149100	-1	Actbeta	Dmau_4	936584	942158	+
CG12560	2L	8008302	8009477	-1	Dsim\GD22448	Scf_2L	7745625	7746785	-1	Dsec\GM13211	scaffold_3	3515293	3516309	-1	CG12560	Dmau_2L	7697317	7698337	+
CG14160	3L	10086747	10089400	-1	Dsim\GD12876	Scf_3L	9823241	9826001	-1	Dsec\GM24824	scaffold_0	2295501	2297487	-1	CG14160	Dmau_3L	9612206	9614190	+
Ing3	X	18650718	18653091	-1	Dsim\GD24472	Scf_NODE_39788	39540	42115	-1	Dsec\GM22794	scaffold_8	848314	850456	-1
CG34183	2L	9890061	9890772	-1	Dsim\GD22332	Scf_2L	9587260	9587972	-1	Dsec\GM12222	scaffold_3	5320158	5336608	-1	CG34183	Dmau_2L	9518293	9518902	+
Gip	X	10328877	10329872	-1	Dsim\GD12017	Scf_X	9693027	9694049	-1	Dsec\GM11322	scaffold_15	925419	926213	-1	Gip	Dmau_X	9531716	9532510	+
CG14515	3R	29197556	29199211	1	Dsim\GD21425	Scf_3R	24381803	24383675	1	Dsec\GM12774	scaffold_4	3886338	3887873	1	CG14515	Dmau_3R	24092715	24094247	+
Dh44-R2	2R	12474424	12487986	1	Dsim\GD10893	Scf_2R	9073314	9085691	1	Dsec\GM21397	scaffold_1	5918175	5922332	1	Dh44-R2	Dmau_2R	6750623	6754724	+
mamo	X	13846116	13990527	-1	Dsim\GD15868	Scf_X	12994943	13126654	-1	Dsec\GM17579	scaffold_20	395495	398592	-1
mop	3L	14769341	14776129	-1	Dsim\GD12600	Scf_3L	14411295	14417939	-1	Dsec\GM24530	scaffold_0	6883583	6889897	-1	mop	Dmau_3L	14155962	14162226	+
CG4538	3R	19897372	19903689	-1	Dsim\GD20094	Scf_3R	5555109	5561387	1	Dsec\GM26887	scaffold_25	49033	52333	1	CG4538	Dmau_3R	5446574	5450177	+
CG13984	2L	6308819	6309475	1	Dsim\GD23399	Scf_2L	6104077	6104755	1	Dsec\GM18618	scaffold_5	4379840	4380223	1	CG13984	Dmau_2L	6060254	6060556	+
Cpr78E	3L	21666452	21666980	-1	Dsim\GD12099	Scf_3L	21075698	21076284	-1	Dsec\GM22121	scaffold_11	1579622	1580101	-1	Cpr78E	Dmau_3L	20697660	20698061	+
ppk5	3L	21534660	21536861	1	Dsim\GD14969	Scf_3L	20941246	20944906	1	Dsec\GM22379	scaffold_11	1448564	1449148	1	ppk5	Dmau_3L	20564013	20566356	+
CG42663	2R	12705172	12751545	1	Dsim\GD10916	Scf_2R	9302733	9339557	1	Dsec\GM21421	scaffold_1	6173891	6176121	1	CG42663	Dmau_2R	6979805	7007110	+
CG17026	3L	15975368	15976428	1	Dsim\GD14582	Scf_3L	15587016	15588244	1	Dsec\GM25567	scaffold_0	8068752	8069664	1	CG17026	Dmau_3L	15323602	15324514	+
CG4465	3R	19915868	19917839	-1	Dsim\GD20091	Scf_3R	5540921	5543097	1	Dsec\GM26883	scaffold_25	34273	36062	1	CG4465	Dmau_3R	5431765	5433553	+
CG31827	2L	15705171	15706220	1	Dsim\GD22795	Scf_2L	2726594	2727760	-1	Dsec\GM18188	scaffold_5	1004992	1006098	-1
CG17036	2L	12698918	12700746	-1	Dsim\GD22102	Scf_2L	12308858	12310805	-1	Dsec\GM26031	scaffold_16	883465	884827	-1	CG17036	Dmau_2L	12219789	12221151	+
djl	3R	7060767	7061919	1	Dsim\GD28665	Scf_3R	2811667	2812852	1	Dsec\GM10924	scaffold_6	2976933	2977848	1	djl	Dmau_3R	2714983	2715904	+
Nup133	3R	22690607	22694772	1	Dsim\Nup133	Scf_3R	18041509	18045674	1	Dsec\GM26458	scaffold_0	18874232	18878240	1	Nup133	Dmau_3R	17808579	17812590	+
CG33253	X	19183421	19187278	1	Dsim\GD17427	Scf_X	17967488	17971010	1	Dsec\GM22946	scaffold_8	1367020	1370155	1	CG33253	Dmau_X	17891769	17895162	+
CG10635	3L	5367341	5368008	-1
CG31635	2L	6632798	6649114	-1	Dsim\GD22560	Scf_2L	6407026	6422667	-1	Dsec\GM14056	scaffold_3	2173996	2185763	-1	CG31635	Dmau_2L	6363919	6375711	+
Exo70	3L	8411851	8415910	1	Dsim\GD28816	Scf_3L	8210832	8214839	1	Dsec\GM25054	scaffold_0	701110	704929	1	Exo70	Dmau_3L	8016919	8020740	+
CG43222	3R	24634625	24635165	-1	Dsim\GD18281	Scf_3R	19989368	19989924	-1	Dsec\GM23473	scaffold_0	20794865	20795113	-1	CG43222	Dmau_3R	19712906	19713153	+
CG5334	X	14775308	14776299	1	Dsim\GD27884	Scf_X	13851791	13852783	1	Dsec\GM12044	scaffold_32	121655	122293	1
CG16717	3L	9679201	9681060	1	Dsim\GD14203	Scf_3L	9430196	9431926	1	Dsec\GM25174	scaffold_0	1906747	1907649	1	CG16717	Dmau_3L	9222140	9223042	+
CG5509	3R	12452464	12453196	1	Dsim\GD27558	Scf_3R	12835553	12836257	-1						CG5509	Dmau_3R	12659037	12659456	+
bur	2L	21174182	21179683	-1	Dsim\GD21646	Scf_2L	20568903	20574472	-1	Dsec\GM23268	scaffold_18	1096248	1099014	-1	bur	Dmau_2L	20195114	20197877	+
CG12309	2R	10725270	10727272	1	Dsim\GD10752	Scf_2R	7351064	7353088	1	Dsec\GM21232	scaffold_1	4193327	4194226	1	CG12309	Dmau_2R	5038629	5040212	+
CG18449	2R	8367163	8367927	-1	Dsim\GD15277	Scf_2R	5073252	5074030	-1	Dsec\GM20694	scaffold_1	1900698	1901177	-1	CG18449	Dmau_2R	2784411	2784889	+
CG42668	3R	20309344	20324196	1	Dsim\GD19346	Scf_3R	5154625	5169341	-1	Dsec\GM23106	scaffold_27	588676	593765	-1	CG42668	Dmau_3R	5047483	5060650	+
CG14756	2R	8204888	8205706	-1	Dsim\GD10177	Scf_2R	4906891	4911087	-1	Dsec\GM20710	scaffold_1	1735622	1736347	-1	CG14756	Dmau_2R	2621970	2622695	+
PH4alphaSG2	3R	30490074	30491987	1	Dsim\GD21523	Scf_3R	25635788	25637809	1	Dsec\GM12884	scaffold_4	5135184	5136362	1	PH4alphaSG2	Dmau_3R	25336507	25338329	+
CG6310	3L	11069043	11069864	-1	Dsim\GD12832	Scf_3L	10808146	10809212	-1	Dsec\GM24781	scaffold_0	3290069	3290830	-1	CG6310	Dmau_3L	10586664	10587425	+
CG12541	X	7021608	7066052	-1	Dsim\GD16167	Scf_X	6504160	6541203	-1	Dsec\GM17482	scaffold_24	145915	147818	-1	CG12541	Dmau_X	6378395	6381508	+
tll	3R	30852315	30854400	1	Dsim\GD21550	Scf_3R	25988254	25990907	1	Dsec\GM12909	scaffold_4	5503403	5504914	1	tll	Dmau_3R	25689499	25690974	+
CG8740	2R	8735810	8759590	1
Hmgcr	3R	23733324	23750992	1	Dsim\GD21034	Scf_3R	19109638	19127393	1	Dsec\GM26526	scaffold_0	19930665	19934501	1	Hmgcr	Dmau_3R	18853999	18857349	+
CG14545	3R	25850410	25851291	-1	Dsim\GD18162	Scf_3R	21172482	21173286	-1	Dsec\GM10210	scaffold_13	455872	456336	-1	CG14545	Dmau_3R	20893999	20894487	+
PpV	X	6371065	6372915	-1	Dsim\GD26791	Scf_X	5876867	5879172	-1	Dsec\GM12574	scaffold_4	427243	506398	1	PpV	Dmau_X	5772223	5773290	+
Ctr1B	3R	8317612	8319205	1	Dsim\GD15144	Scf_3R	16821943	16823989	-1	Dsec\GM23723	scaffold_0	17684867	17685929	-1	Ctr1B	Dmau_3R	16626319	16627386	+
Su(P)	3L	16610662	16612199	-1	Dsim\Su(P)	Scf_3L	16204146	16205691	-1	Dsec\GM24381	scaffold_0	8687092	8688471	-1	Su(P)	Dmau_3L	15935193	15936570	+
CG31515	3R	23388373	23388898	-1	Dsim\GD18384	Scf_3R	18756045	18756579	-1	Dsec\GM23568	scaffold_0	19577749	19578189	-1	CG31515	Dmau_3R	18499842	18500282	+
Got2	2L	1984512	1987758	-1	Dsim\GD22881	Scf_2L	1894933	1898200	-1						Got2	Dmau_2L	1873582	1875760	+
CG8031	3R	13008384	13011310	-1	Dsim\GD20526	Scf_3R	12327984	12330863	1	Dsec\GM25966	scaffold_0	13159550	13162022	1	CG8031	Dmau_3R	12153591	12156069	+
CG31050	3R	28649909	28650480	-1	Dsim\GD18023	Scf_3R	23855204	23855743	-1	Dsec\GM12289	scaffold_4	3358170	3358473	-1	CG31050	Dmau_3R	23567467	23567770	+
CG4854	3R	20028058	20029561	1	Dsim\GD19333	Scf_3R	5429440	5430931	-1	Dsec\GM17690	scaffold_58	93046	94300	-1	CG4854	Dmau_3R	5320449	5321676	+
CG14671	3R	5563977	5564815	-1	Dsim\GD19606	Scf_3R	1284818	1285635	-1	Dsec\GM10618	scaffold_6	1504625	1505157	-1	CG14671	Dmau_3R	1267214	1267746	+
CG9090	2R	20279066	20281127	-1
CG4313	X	2041868	2055414	1	Dsim\GD16583	Scf_X	1778264	1791491	1	Dsec\GM19190	scaffold_10	1731617	1733811	1	CG4313	Dmau_X	1762080	1764275	+
alpha-Est6	3R	7524567	7528777	-1	Dsim\alpha-Est6	Scf_3R	3268400	3272730	-1	Dsec\GM10473	scaffold_6	3445926	3450069	-1	alpha-Est6	Dmau_3R	3181243	3185413	+
CG14949	3L	2642184	2643424	-1	Dsim\GD13381	Scf_3L	2529452	2530721	-1	Dsec\GM14113	scaffold_2	2668389	2669302	-1	CG14949	Dmau_3L	2505572	2506487	+
mRpL1	3R	8301440	8302770	1	Dsim\GD28099	Scf_3R	16838331	16839651	-1	Dsec\GM23720	scaffold_0	17700784	17701959	-1	mRpL1	Dmau_3R	16642411	16643586	+
Rpt6R	3R	30582198	30583697	-1	Dsim\GD16958	Scf_3R	25727643	25729237	-1	Dsec\GM12144	scaffold_4	5234835	5236093	-1	Rpt6R	Dmau_3R	25428219	25429476	+
l(2)tid	2R	23706913	23709026	1	Dsim\GD11789	Scf_2R	20058400	20060518	1	Dsec\GM16041	scaffold_9	2873742	2875412	1	l(2)tid	Dmau_2R	17567985	17569664	+
CG42542	3R	15196598	15203074	1	Dsim\GD18991	Scf_3R	10200296	10206855	-1	Dsec\GM24201	scaffold_0	10923607	10927082	-1	CG42542	Dmau_3R	10032233	10035708	+
CG13028	3L	16923252	16923994	1	Dsim\GD14679	Scf_3L	16507805	16508628	1	Dsec\GM25675	scaffold_0	8986749	8987303	1	CG13028	Dmau_3L	16237307	16237861	+
CG6576	3L	8755989	8757167	1	Dsim\GD14125	Scf_3L	8538389	8539625	1	Dsec\GM25089	scaffold_0	1026696	1027499	1	CG6576	Dmau_3L	8341675	8342478	+
yellow-d	2R	23378573	23380438	1	Dsim\GD11758	Scf_2R	19743645	19745980	1	Dsec\GM16007	scaffold_9	2560847	2562254	1	yellow-d	Dmau_2R	17254020	17255433	+
slam	2L	6372388	6377284	1	Dsim\GD23406	Scf_2L	6165015	6169942	1	Dsec\GM18624	scaffold_5	4441359	4445015	1	slam	Dmau_2L	6122229	6125816	+
pigeon	2L	19186043	19189938	1	Dsim\GD24190	Scf_2L	18694856	18698740	1	Dsec\GM17331	scaffold_7	2809578	2813016	1	pigeon	Dmau_2L	18413005	18416443	+
CG7006	3R	24850627	24851385	1	Dsim\GD21137	Scf_3R	20192122	20192907	1	Dsec\GM26634	scaffold_0	21024218	21024811	1	CG7006	Dmau_3R	19925009	19925602	+
CG7065	X	9142493	9147894	1	Dsim\GD16930	Scf_X	8570825	8576082	1	Dsec\GM13721	scaffold_34	395884	400598	1	CG7065	Dmau_X	8406960	8415302	+
CG42650	3R	7391413	7392280	1	Dsim\GD19934	Scf_3R	3136339	3137245	1	Dsec\GM10958	scaffold_6	3309032	3309367	1	CG42650	Dmau_3R	3049963	3050632	+
Aps	3L	10894776	10899123	-1	Dsim\GD17584	Scf_3L	10635443	10639209	-1	Dsec\GM24794	scaffold_0	3108429	3109167	-1	Aps	Dmau_3L	10415192	10415929	+
CG14151	3L	10627680	10628484	-1	Dsim\GD12858	Scf_3L	10367690	10368514	-1	Dsec\GM24805	scaffold_0	2842086	2842792	-1	CG14151	Dmau_3L	10149433	10150139	+
CG18744	3R	7797078	7798771	-1	Dsim\GD19460	Scf_3R	3511767	3513558	-1	Dsec\GM10456	scaffold_6	3694521	3696121	-1	CG18744	Dmau_3R	3415443	3417035	+
CG34386	2R	18062415	18093628	1	Dsim\GD11335	Scf_2R	14594589	14620557	1	Dsec\GM21841	scaffold_1	11473774	11474685	1	CG34386	Dmau_2R	12155777	12159344	+
CG5656	3L	21442227	21444819	-1
Non1	2R	9396265	9398734	-1
CG12126	2R	8262674	8263278	-1	Dsim\GD15287	Scf_2R	4967804	4968420	-1	Dsec\GM20705	scaffold_1	1796592	1796921	-1	CG12126	Dmau_2R	2679434	2679763	+
CheA46a	2R	9748800	9749389	1	Dsim\GD10679	Scf_2R	6414024	6414988	1	Dsec\GM21148	scaffold_1	3245627	3246213	1	CheA46a	Dmau_2R	4112950	4113536	+
hang	X	16422831	16438454	1
CG11837	3R	29049493	29050721	1	Dsim\GD21406	Scf_3R	24235669	24236889	1	Dsec\GM12757	scaffold_4	3738363	3739398	1	CG11837	Dmau_3R	23946999	23948035	+
CG31609	2L	9097563	9098175	1	Dsim\GD23586	Scf_2L	8795781	8796395	1	Dsec\GM17400	scaffold_3	4563987	4564861	1	CG31609	Dmau_2L	8743690	8744118	+
sunz	3R	6630151	6631184	1	Dsim\GD19884	Scf_3R	2353436	2354456	1	Dsec\GM10904	scaffold_6	2549450	2550226	1	sunz	Dmau_3R	2289102	2289878	+
Plip	3R	23758339	23759606	1
CG8547	2R	14261206	14267919	-1	Dsim\GD25691	Scf_2R	10851623	10858395	-1	Dsec\GM20219	scaffold_1	7656884	7659311	-1	CG8547	Dmau_2R	8439478	8441914	+
CG14834	3L	7345698	7347123	-1	Dsim\GD13068	Scf_3L	7205423	7206887	-1	Dsec\GM13770	scaffold_2	7263260	7264899	-1	CG14834	Dmau_3L	7016374	7017591	+
CG6621	3R	10889768	10893531	-1	Dsim\GD20689	Scf_3R	14363377	14367303	1	Dsec\GM26135	scaffold_0	15231671	15234939	1	CG6621	Dmau_3R	14174484	14177758	+
Roc1a	X	647304	648597	1											Roc1a	Dmau_X	442931	443410	+
CG11123	2R	7440706	7442885	1	Dsim\GD10479	Scf_2R	4149505	4151741	1	Dsec\GM20954	scaffold_1	972811	974860	1	CG11123	Dmau_2R	1887289	1889341	+
CG17199	3R	20208201	20209791	-1	Dsim\GD20077	Scf_3R	5262689	5264355	1	Dsec\GM23206	scaffold_27	696935	698320	1	CG17199	Dmau_3R	5153687	5155081	+
CG42245	3L	2631715	2641984	1	Dsim\GD13697	Scf_3L	2519029	2521002	1	Dsec\GM14501	scaffold_2	2655350	2657148	1	CG42245	Dmau_3L	2494886	2496825	+
CG34432	3R	30649151	30649873	1	Dsim\GD21538	Scf_3R	25795507	25796388	1	Dsec\GM12899	scaffold_4	5301484	5307945	1	CG34432	Dmau_3R	25495331	25495972	+
His2B:CG33890	2L	21482504	21483098	-1	Dsim\GD22305	Scf_NODE_42015	1449	1884	-1	Dsec\GM16910	scaffold_136	11939	12460	-1
CG15766	X	5814864	5815820	-1											CG15766	Dmau_X	5247901	5248551	+
CG34433	3R	30649961	30650858	1	Dsim\GD21538	Scf_3R	25795507	25796388	1	Dsec\GM12899	scaffold_4	5301484	5307945	1	CG34433	Dmau_3R	25496081	25496782	+
Gr93c	3R	21844014	21845265	-1	Dsim\GD18499	Scf_3R	17206150	17207465	-1	Dsec\GM23689	scaffold_0	18042351	18043602	-1	Gr93c	Dmau_3R	16981342	16982593	+
tomboy20	3R	10735277	10735957	-1	Dsim\GD20710	Scf_3R	14512912	14513613	1	Dsec\GM26157	scaffold_0	15380319	15380762	1	tomboy20	Dmau_3R	14323607	14324050	+
CG9507	2L	6381266	6383419	1	Dsim\GD23407	Scf_2L	6173350	6176026	1	Dsec\GM18625	scaffold_5	4449086	4451140	1	CG9507	Dmau_2L	6129899	6131953	+
eIF2B-delta	2R	23386521	23389052	1
alphaTub85E	3R	9731221	9733250	-1	Dsim\GD20767	Scf_3R	15475281	15477289	1	Dsec\GM26223	scaffold_0	16346147	16347933	1	alphaTub85E	Dmau_3R	15287108	15288589	+
CG18480	2L	15630002	15634987	1
CG12333	3R	18400373	18402716	-1	Dsim\GD20169	Scf_3R	7048051	7050555	1	Dsec\GM18704	scaffold_5	5666885	5668504	1	CG12333	Dmau_3R	6902638	6904250	+
CG9312	3R	13765756	13767103	1	Dsim\GD18928	Scf_3R	11585700	11587130	-1	Dsec\GM24129	scaffold_0	12415165	12416397	-1	CG9312	Dmau_3R	11414533	11415775	+
CycT	3L	17551004	17557788	-1	Dsim\GD12396	Scf_3L	17135808	17141285	-1	Dsec\GM24323	scaffold_0	9592840	9597106	-1	CycT	Dmau_3L	16837342	16841589	+
CG8323	2R	14165051	14166991	1	Dsim\GD11023	Scf_2R	10759236	10761393	1	Dsec\GM21512	scaffold_1	7560433	7561857	1	CG8323	Dmau_2R	8349483	8350909	+
CG42516	2R	8129354	8131323	-1	Dsim\GD10187	Scf_2R	4834780	4835524	-1	Dsec\GM20720	scaffold_1	1656034	1656486	-1	CG42516	Dmau_2R	2547196	2547648	+
CG33672	2R	12634166	12636141	-1	Dsim\GD25826	Scf_2R	9230493	9232487	-1	Dsec\GM20347	scaffold_1	6069661	6069921	-1	CG33672	Dmau_2R	6900119	6900379	+
Pif1B	3R	8774286	8801176	-1	Dsim\GD20844	Scf_3R	16368295	16391755	1	Dsec\GM26313	scaffold_0	17253573	17256508	1	Pif1B	Dmau_3R	16195440	16198474	+
Pi4KIIalpha	3R	5557663	5563652	-1	Dsim\GD19607	Scf_3R	1278869	1284460	-1	Dsec\GM10622	scaffold_6	1498781	1500162	-1	Pi4KIIalpha	Dmau_3R	1261364	1266155	+
CG32206	3L	19340321	19412912	-1	Dsim\GD12285	Scf_3L	18893888	18961341	-1	Dsec\GM18884	scaffold_29	37474	80971	-1	CG32206	Dmau_3L	18540827	18583668	+
Trf2	X	8409272	8433011	1	Dsim\GD27042	Scf_X	7864750	7883935	1	Dsec\GM21561	scaffold_35	171600	173075	1	Trf2	Dmau_X	7724536	7727477	+
Aats-glupro	3R	23952136	23958391	-1
CG31560	3R	6309976	6310998	1	Dsim\GD19853	Scf_3R	2037189	2038084	1	Dsec\GM10880	scaffold_6	2221875	2222714	1	CG31560	Dmau_3R	1979373	1980268	+
Lsd-1	3R	23763857	23766662	1	Dsim\GD21037	Scf_3R	19140310	19143116	1	Dsec\GM26530	scaffold_0	19948332	19950526	1	Lsd-1	Dmau_3R	18871257	18873400	+
CG10337	2L	19545376	19546959	-1	Dsim\GD21746	Scf_2L	19039753	19041342	-1	Dsec\GM16999	scaffold_7	3159985	3160994	-1	CG10337	Dmau_2L	18758043	18759052	+
CG3689	3L	9411038	9413637	1	Dsim\GD14179	Scf_3L	9175013	9177594	1	Dsec\GM25145	scaffold_0	1649519	1650433	1	CG3689	Dmau_3L	8966403	8968535	+
Rbsn-5	2L	8159832	8161800	1	Dsim\GD23509	Scf_2L	7887447	7889455	1	Dsec\GM16797	scaffold_3	3657471	3659165	1	Rbsn-5	Dmau_2L	7839347	7840987	+
bbx	X	21363028	21373145	1	Dsim\GD17533	Scf_X	19955624	19965494	1	Dsec\GM23082	scaffold_8	3548641	3551228	1	bbx	Dmau_X	19850087	19852573	+
CG17493	2L	22550064	22556295	1	Dsim\GD17706	Scf_2L	21670401	21671689	1	Dsec\GM19287	scaffold_134	32348	32896	1	CG17493	Dmau_2L	21008165	21008713	+
CG13712	3L	4709209	4709890	-1	Dsim\GD13236	Scf_3L	4652594	4656434	-1	Dsec\GM13953	scaffold_2	4693460	4693810	-1	CG13712	Dmau_3L	4512877	4513227	+
2019-12-01	X	7867161	7873222	-1
CG42269	3L	6066296	6071545	1	Dsim\GD13929	Scf_3L	5968233	5974239	1	Dsec\GM14747	scaffold_2	6011163	6013063	1	CG42269	Dmau_3L	5802494	5807317	+
Tsp39D	2L	21344607	21358271	1	Dsim\GD24319	Scf_2L	20746905	20754914	1	Dsec\GM23410	scaffold_18	1278735	1279959	1	Tsp39D	Dmau_2L	20364078	20365293	+
CG18659	2R	9123304	9132030	-1
sdt	X	8178549	8240474	1	Dsim\GD16886	Scf_X	7634610	7693713	1	Dsec\GM11239	scaffold_44	202291	223565	1	sdt	Dmau_X	7487861	7541217	+
CG14434	X	6851909	6867194	-1	Dsim\GD24582	Scf_X	6337522	6338487	-1	Dsec\GM12544	scaffold_4	48414	48977	1	CG14434	Dmau_X	6214823	6215386	+
CG5421	2L	12446080	12448132	-1	Dsim\GD22118	Scf_2L	12063494	12065239	-1	Dsec\GM26197	scaffold_16	636742	638472	-1	CG5421	Dmau_2L	11976175	11977896	+
HP4	3L	7975438	7976154	-1	Dsim\GD13027	Scf_3L	7785625	7786348	-1	Dsec\GM24978	scaffold_0	263509	263902	-1	HP4	Dmau_3L	7594210	7594528	+
CG42375	3R	13779624	13780795	1	Dsim\GD28378	Scf_3R	11572225	11573423	-1	Dsec\GM24132	scaffold_0	12401725	12402027	-1	CG42375	Dmau_3R	11401773	11402075	+
TSG101	3L	16842294	16844585	1	Dsim\GD14667	Scf_3L	16425963	16428265	1	Dsec\GM25660	scaffold_0	8906162	8907944	1	TSG101	Dmau_3L	16156899	16158676	+
Jafrac1	X	13329824	13331994	1	Dsim\GD17115	Scf_X	12557128	12559363	1	Dsec\GM11621	scaffold_21	980329	980913	1	Jafrac1	Dmau_X	12349483	12350067	+
Ef1alpha48D	2R	11891135	11895762	1
prtp	X	11716756	11719894	1	Dsim\GD17042	Scf_X	10994227	10996859	1	Dsec\GM13104	scaffold_36	300157	302519	1	prtp	Dmau_X	10814583	10816949	+
Adf1	2R	6662265	6668085	1	Dsim\GD10415	Scf_2R	3414045	3417895	1	Dsec\GM20885	scaffold_1	216493	219334	1
Lis-1	2R	16178826	16185103	1	Dsim\GD11168	Scf_2R	12735944	12741397	1	Dsec\GM21668	scaffold_1	9568876	9570504	1	Lis-1	Dmau_2R	10295102	10296738	+
MTF-1	3L	9430312	9439490	1	Dsim\GD14182	Scf_3L	9194167	9202067	1	Dsec\GM25148	scaffold_0	1668484	1675788	1	MTF-1	Dmau_3L	8985598	8992950	+
homer	2L	6719394	6723359	-1
CG10737	2R	19164143	19178223	1	Dsim\GD11432	Scf_2R	15656971	15671012	1	Dsec\GM21936	scaffold_1	12570920	12577321	1	CG10737	Dmau_2R	13193623	13200010	+
CG15201	X	11144120	11144809	1	Dsim\GD27751	Scf_X	10475664	10476358	1	Dsec\GM11461	scaffold_15	1741881	1742424	1	CG15201	Dmau_X	10300116	10300659	+
CG43210	3R	18564264	18565173	-1	Dsim\GD27084	Scf_3R	6876731	6877165	1	Dsec\GM18698	scaffold_5	5505394	5505573	1	CG43210	Dmau_3R	6741514	6741693	+
CG17343	2L	19064929	19069673	1
Sardh	2R	17753555	17756422	-1	Dsim\GD25443	Scf_2R	14288220	14291161	-1	Dsec\GM19952	scaffold_1	11139746	11142549	-1	Sardh	Dmau_2R	11828465	11831259	+
CG43249	3L	16304282	16304662	1	Dsim\GD14618	Scf_3L	15911659	15912092	1						CG43249	Dmau_3L	15646704	15646995	+
nrv2	2L	6789770	6798862	-1	Dsim\GD22540	Scf_2L	6563675	6572812	-1	Dsec\GM13825	scaffold_3	2329356	2335246	-1	nrv2	Dmau_2L	6519872	6525747	+
CG32506	X	20449331	20467065	1						Dsec\GM23036	scaffold_8	2525055	2529151	1
Mlc1	3R	27657078	27660177	-1	Dsim\Mlc1	Scf_3R	22908081	22910895	-1	Dsec\Mlc1	scaffold_22	127068	129088	-1	Mlc1	Dmau_3R	22622327	22624346	+
NimB4	2L	13968280	13969976	-1
mago	2R	21128577	21129737	1	Dsim\GD11565	Scf_2R	17528544	17529318	1	Dsec\GM15806	scaffold_9	345047	345548	1	mago	Dmau_2R	15050891	15051392	+
sca	2R	12780541	12802010	1	Dsim\GD10921	Scf_2R	9369612	9381890	1	Dsec\GM21425	scaffold_1	6209157	6220685	1	sca	Dmau_2R	7037427	7049179	+
Inx5	X	19168777	19170883	-1	Dsim\GD15600	Scf_X	17952494	17954666	-1	Dsec\GM22765	scaffold_8	1352164	1353772	-1	Inx5	Dmau_X	17877155	17878752	+
Tak1	X	20515908	20524928	-1
CG9616	3R	14244804	14245471	-1	Dsim\GD20437	Scf_3R	11135418	11136133	1	Dsec\GM25867	scaffold_0	11967215	11967696	1	CG9616	Dmau_3R	10964004	10964596	+
tou	2R	11577485	11616045	-1	Dsim\GD25895	Scf_2R	8169328	8208080	-1	Dsec\GM20421	scaffold_1	5018178	5027284	-1	tou	Dmau_2R	5851094	5863362	+
Hers	X	19866146	19908108	1	Dsim\GD29496	Scf_X	18627740	18667967	1	Dsec\GM22066	scaffold_2418	59	676	1	Hers	Dmau_X	18573569	18577663	+
CG4681	2R	24578247	24579827	-1	Dsim\GD24939	Scf_2R	20900818	20902360	-1	Dsec\GM11816	scaffold_23	339669	340893	-1	CG4681	Dmau_2R	18405630	18406848	+
CR40172	2L	20248928	20249722	-1
CG4925	3L	16348747	16351951	-1
ATPsynB	3L	9729999	9731224	1	Dsim\GD14214	Scf_3L	9482576	9483825	1	Dsec\GM25183	scaffold_0	1956717	1957744	1	ATPsynB	Dmau_3L	9272097	9273124	+
IntS9	3L	16103432	16105627	-1	Dsim\GD12515	Scf_3L	15715209	15717409	-1	Dsec\GM24446	scaffold_0	8196264	8198345	-1	IntS9	Dmau_3L	15451105	15453116	+
flw	X	10385960	10409817	1	Dsim\GD16975	Scf_X	9741645	9763507	1						flw	Dmau_X	9581478	9598891	+
CG17352	3L	8352355	8356296	-1
CG13759	X	2580958	2583823	1											CG13759	Dmau_X	2260580	2261266	+
CG7601	3R	29735269	29736745	-1
Gr22c	2L	1790617	1791823	-1	Dsim\GD28049	Scf_2L	1717265	1718479	-1	Dsec\GM16589	scaffold_14	1726394	1727605	-1	Gr22c	Dmau_2L	1700833	1702025	+
CG14550	3R	26057347	26058223	-1
CG34425	3R	4504612	4506365	-1	Dsim\GD27768	Scf_3R	293774	295531	-1	Dsec\GM10698	scaffold_6	429842	438946	-1	CG34425	Dmau_3R	295493	297097	+
CG5484	3R	26717871	26719806	1	Dsim\GD21299	Scf_3R	22003137	22005065	1	Dsec\GM10339	scaffold_13	1317628	1319248	1	CG5484	Dmau_3R	21722280	21723900	+
CG5964	3L	11790212	11793283	-1	Dsim\GD12775	Scf_3L	11485230	11488291	-1	Dsec\GM24710	scaffold_0	3969283	3972129	-1	CG5964	Dmau_3L	11257428	11260273	+
CG13477	3L	14691347	14691962	1
CG3880	2R	24760664	24762605	1	Dsim\GD11894	Scf_2R	21067530	21069517	1	Dsec\GM11896	scaffold_23	507419	508681	1	CG3880	Dmau_2R	18573135	18574397	+
CG1986	X	9908663	9911126	-1	Dsim\GD16048	Scf_X	9327205	9329750	-1	Dsec\GM11341	scaffold_15	565223	565567	-1	CG1986	Dmau_X	9144546	9146057	+
Map205	3R	32055279	32068441	-1	Dsim\GD16184	Scf_3R	27143090	27155377	-1	Dsec\GM16406	scaffold_31	534210	544627	-1	Map205	Dmau_3R	26839985	26849150	+
Try29F	2L	8998537	8999816	1	Dsim\GD29052	Scf_2L	8704248	8705504	1	Dsec\GM17347	scaffold_3	4472335	4473111	1	Try29F	Dmau_2L	8652340	8653143	+
CG43691	2R	13389495	13393361	-1	Dsim\GD25764	Scf_2R	9945053	9948860	-1	Dsec\GM20284	scaffold_1	6800429	6803774	-1	CG43691	Dmau_2R	7608736	7612098	+
Flo2	X	14839376	14933946	1	Dsim\GD17182	Scf_X	13905456	13997043	1	Dsec\GM12049	scaffold_32	176519	291294	1	Flo2	Dmau_X	13825236	13833098	+
Ilp6	X	2331493	2334658	-1	Dsim\GD28130	Scf_X	2054339	2057462	-1	Dsec\GM18888	scaffold_10	2002155	2003754	-1	Ilp6	Dmau_X	2025874	2026271	+
mRpL49	X	12907105	12907942	1	Dsim\GD24800	Scf_X	12144977	12145898	1	Dsec\GM11588	scaffold_21	551245	551848	1	mRpL49	Dmau_X	11947703	11948306	+
CG17470	2L	20642306	20643244	-1	Dsim\GD21693	Scf_2L	20062929	20063867	-1	Dsec\GM23320	scaffold_18	561756	562394	-1	CG17470	Dmau_2L	19684259	19684909	+
His2B:CG33886	2L	21492700	21493294	-1	Dsim\GD22305	Scf_NODE_42015	1449	1884	-1	Dsec\GM16910	scaffold_136	11939	12460	-1
mRpL12	3L	8956791	8957584	1	Dsim\GD14139	Scf_3L	8733603	8734401	1	Dsec\GM25104	scaffold_0	1220326	1220874	1	mRpL12	Dmau_3L	8536484	8537032	+
CG3011	X	5913067	5916797	-1
RpI1	2R	14595611	14601216	-1	Dsim\GD25674	Scf_2R	11185061	11190653	-1	Dsec\GM20204	scaffold_1	8000137	8005582	-1	RpI1	Dmau_2R	8757892	8763344	+
CG43129	2L	10850141	10854604	1
CG13053	3L	16259037	16259722	-1
RpL36	X	628338	629483	-1	Dsim\GD16468	Scf_X	434353	435580	-1	Dsec\GM19031	scaffold_10	368807	369213	-1	RpL36	Dmau_X	424820	425226	+
CG1537	X	11062027	11063170	-1	Dsim\GD16003	Scf_X	10400798	10401986	-1	Dsec\GM11267	scaffold_15	1667829	1668486	-1	CG1537	Dmau_X	10225655	10226312	+
GILT1	3R	13398526	13401862	-1	Dsim\GD20500	Scf_3R	11952477	11955703	1	Dsec\GM25939	scaffold_0	12778384	12781231	1	GILT1	Dmau_3R	11777710	11780594	+
CG2016	3R	4956999	4961351	-1	Dsim\GD27194	Scf_3R	710364	714686	-1	Dsec\GM10667	scaffold_6	913405	917140	-1	CG2016	Dmau_3R	691810	695646	+
CG15249	X	9887972	9899585	-1	Dsim\GD27406	Scf_X	9307066	9308272	-1	Dsec\GM11342	scaffold_15	542987	543677	-1	CG15249	Dmau_X	9124347	9125105	+
SP	3L	13301635	13301922	1	Dsim\Acp70A	Scf_3L	12996205	12996530	1	Dsec\Acp70A	scaffold_0	5469242	5469474	1	SP	Dmau_3L	12746271	12746510	+
CG32182	3L	17758112	17759553	1	Dsim\GD14725	Scf_3L	17333857	17336865	1	Dsec\GM25718	scaffold_0	9798392	9799708	1	CG32182	Dmau_3L	17034469	17035733	+
Saf6	2L	813314	815950	-1	Dsim\GD22941	Scf_2L	776365	778939	-1	Dsec\GM16645	scaffold_14	783826	786200	-1	Saf6	Dmau_2L	770882	773250	+
mus205	2R	7793625	7801044	1	Dsim\GD15358	Scf_2R	4522403	4530091	1	Dsec\GM20982	scaffold_1	1337605	1344646	1	mus205	Dmau_2R	2236086	2243125	+
gfzf	3R	7145880	7150968	-1	Dsim\GD19500	Scf_3R	2894842	2899681	-1	Dsec\GM10503	scaffold_6	3066399	3068769	-1	gfzf	Dmau_3R	2804183	2808436	+
nrv1	2L	6778555	6786861	-1	Dsim\GD22541	Scf_2L	6552303	6560672	-1	Dsec\GM13836	scaffold_3	2318146	2325181	-1	nrv1	Dmau_2L	6508572	6515667	+
MEP-1	3L	2631715	2641984	1	Dsim\GD13699	Scf_3L	2518952	2529599	1	Dsec\GM14502	scaffold_2	2660549	2666990	1	MEP-1	Dmau_3L	2500240	2504085	+
CG30416	2R	23321481	23323399	-1	Dsim\GD25063	Scf_2R	19686437	19688413	-1	Dsec\GM15562	scaffold_9	2502120	2503833	-1	CG30416	Dmau_2R	17195173	17196889	+
CG33108	3R	23995659	23997544	1	Dsim\GD28812	Scf_3R	19358399	19360407	1	Dsec\GM26548	scaffold_0	20162976	20164733	1	CG33108	Dmau_3R	19086304	19088053	+
CG12304	3L	15583638	15585347	1
CG9775	3R	4638010	4641838	-1	Dsim\GD19666	Scf_3R	411955	415591	-1	Dsec\GM10692	scaffold_6	578100	579986	-1	CG9775	Dmau_3R	397434	399345	+
CG9095	X	15139937	15163225	-1	Dsim\GD15819	Scf_X	14187199	14209056	-1	Dsec\GM12001	scaffold_32	485367	503229	-1	CG9095	Dmau_X	14022716	14043792	+
esn	2R	7086316	7127868	1	Dsim\GD10458	Scf_2R	3842890	3864667	1	Dsec\GM20932	scaffold_1	675146	683368	1	esn	Dmau_2R	1597185	1605049	+
CG4730	3R	25677072	25678682	-1	Dsim\GD18182	Scf_3R	21014217	21015826	-1	Dsec\GM10229	scaffold_13	289761	291000	-1	CG4730	Dmau_3R	20738089	20739338	+
CycH	3L	21821997	21823309	1	Dsim\GD15002	Scf_3L	21229034	21230374	1	Dsec\GM22410	scaffold_11	1735948	1737171	1	CycH	Dmau_3L	20850150	20851373	+
pen	X	21346503	21349843	-1
CG11876	3R	29113071	29116197	1	Dsim\GD21413	Scf_3R	24298464	24301792	1	Dsec\GM12765	scaffold_4	3803738	3806454	1	CG11876	Dmau_3R	24009918	24012635	+
Csas	3L	19988027	19988947	-1	Dsim\GD12235	Scf_3L	19472370	19473327	-1	Dsec\GM14951	scaffold_29	626023	626696	-1	Csas	Dmau_3L	19107989	19108658	+
CG34138	3R	19634949	19635879	1	Dsim\GD28615	Scf_3R	5804944	5806476	-1						CG34138	Dmau_3R	5695171	5695939	+
Mad	2L	3146056	3159643	-1	Dsim\GD22774	Scf_2L	3020616	3034709	-1	Dsec\GM18164	scaffold_5	1299857	1302138	-1	Mad	Dmau_2L	2998131	2999985	+
CG4891	2L	16094997	16095944	1
CG17224	2L	3016441	3018308	-1	Dsim\GD12000	Scf_2L	2895322	2896933	-1	Dsec\GM18176	scaffold_5	1173830	1175018	-1	CG17224	Dmau_2L	2871901	2873025	+
Obp18a	X	19135081	19135868	-1	Dsim\Obp18a	Scf_X	17925474	17926202	-1						Obp18a	Dmau_X	17850374	17850815	+
CG9596	2L	6559426	6562289	-1	Dsim\GD22565	Scf_2L	6333511	6335664	-1	Dsec\GM14132	scaffold_3	2099706	2101100	-1	CG9596	Dmau_2L	6289304	6290698	+
CG9192	3L	1237133	1238319	-1	Dsim\GD13490	Scf_3L	1162017	1163484	-1	Dsec\GM14228	scaffold_2	1280937	1281869	-1	CG9192	Dmau_3L	1141494	1142426	+
CG9581	X	20168042	20169981	-1	Dsim\GD29179	Scf_X	18885982	18888031	-1	Dsec\GM22689	scaffold_8	2287917	2288681	-1	CG9581	Dmau_X	18779641	18781335	+
CG31815	2L	16605822	16607321	1	Dsim\GD24063	Scf_2L	16125868	16129998	1	Dsec\GM17187	scaffold_7	253453	254769	1	CG31815	Dmau_2L	15906867	15908189	+
CG9509	X	14906334	14909708	-1	Dsim\GD27819	Scf_X	13971809	13975021	-1	Dsec\GM12020	scaffold_32	241121	243485	-1	CG9509	Dmau_X	13809475	13811851	+
yellow-b	2L	16754336	16758283	1	Dsim\GD24079	Scf_2L	16281992	16285867	1	Dsec\GM17203	scaffold_7	402507	404846	1	yellow-b	Dmau_2L	16056276	16058583	+
Gem3	3L	10459081	10463101	-1	Dsim\GD12861	Scf_3L	10194509	10198037	-1	Dsec\GM24810	scaffold_0	2662787	2665979	-1	Gem3	Dmau_3L	9981233	9984434	+
CG43954	3L	16677567	16711677	-1	Dsim\GD27733	Scf_3L	16266059	16266825	-1	Dsec\GM24375	scaffold_0	8748597	8748962	-1	CG43954	Dmau_3L	15996879	15997244	+
CG34284	3R	18902338	18902933	-1	Dsim\GD20147	Scf_3R	6528591	6529258	1	Dsec\GM18676	scaffold_5	5167973	5168418	1	CG34284	Dmau_3R	6410809	6411254	+
CG32564	X	17206407	17207854	1	Dsim\GD17335	Scf_X	16200806	16202140	1	Dsec\GM13494	scaffold_17	936888	938063	1	CG32564	Dmau_X	15973024	15974259	+
NimB2	2L	13965012	13967018	-1
CG13926	3L	1617348	1618158	-1	Dsim\GD13463	Scf_3L	1527129	1528034	-1	Dsec\GM14199	scaffold_2	1643972	1644388	-1	CG13926	Dmau_3L	1504201	1504879	+
CG10505	2R	21285248	21290343	-1	Dsim\GD25211	Scf_2R	17682263	17687864	-1	Dsec\GM15734	scaffold_9	503060	507679	-1	CG10505	Dmau_2R	15204453	15209083	+
CG10298	3R	6343002	6343799	1	Dsim\GD19865	Scf_3R	2069650	2070462	1	Dsec\GM10886	scaffold_6	2253995	2254611	1	CG10298	Dmau_3R	2011589	2012205	+
Or30a	2L	9111814	9113285	1	Dsim\GD23587	Scf_2L	8804983	8812033	1	Dsec\GM17404	scaffold_3	4578008	4579523	1	Or30a	Dmau_2L	8757850	8759317	+
COX6AL	2R	15944028	15944567	1	Dsim\GD11145	Scf_2R	12501633	12502210	1	Dsec\GM21645	scaffold_1	9331669	9331953	1	COX6AL	Dmau_2R	10066631	10066914	+
SCOT	3L	1963143	1966805	1	Dsim\GD13661	Scf_3L	1873825	1876154	1	Dsec\GM14463	scaffold_2	1990024	1992151	1	SCOT	Dmau_3L	1850708	1852850	+
CG31624	2L	21199045	21200375	-1	Dsim\GD21644	Scf_2L	20593662	20594704	-1	Dsec\GM23266	scaffold_18	1120305	1120841	-1
CG12520	3L	12901247	12902737	-1	Dsim\GD12690	Scf_3L	12593483	12595171	-1	Dsec\GM24623	scaffold_0	5075883	5077080	-1	CG12520	Dmau_3L	12356766	12357948	+
kni	3L	20692330	20695378	-1	Dsim\kni	Scf_3L	20146584	20149051	-1	Dsec\kni	scaffold_11	575326	578960	-1	kni	Dmau_3L	19770453	19772079	+
primo-1	3R	13710017	13711835	-1	Dsim\GD20477	Scf_3R	11641287	11643219	1	Dsec\GM25909	scaffold_0	12470852	12471591	1	primo-1	Dmau_3R	11470667	11471428	+
Rab6	2L	12107221	12109116	-1	Dsim\GD27434	Scf_2L	11729600	11730949	-1	Dsec\GM26307	scaffold_16	296449	297075	-1	Rab6	Dmau_2L	11643015	11643641	+
CG42680	2L	14587920	14588234	-1	Dsim\GD21997	Scf_2L	14127277	14127521	-1	Dsec\GM14751	scaffold_3	861238	861481	-1	CG42680	Dmau_2L	14028539	14028707	+
Cyp313a4	3R	12679279	12681375	-1	Dsim\GD20551	Scf_3R	12651232	12653306	1	Dsec\GM25991	scaffold_0	13477944	13479863	1	Cyp313a4	Dmau_3R	12475691	12477621	+
CG31465	3R	21880810	21883990	1	Dsim\GD20907	Scf_3R	17244117	17247386	1	Dsec\GM26383	scaffold_0	18078015	18081074	1	CG31465	Dmau_3R	17018308	17021273	+
CG2964	2L	2812437	2814429	1	Dsim\GD23184	Scf_2L	2693289	2695284	1	Dsec\GM18368	scaffold_5	971666	973393	1	CG2964	Dmau_2L	2669635	2671294	+
CG10761	X	8161540	8162792	-1	Dsim\GD24575	Scf_X	7617280	7618528	-1	Dsec\GM11202	scaffold_44	141904	142881	-1	CG10761	Dmau_X	7468319	7469290	+
CG43138	X	7528304	7528796	1	Dsim\GD16850	Scf_X	6987256	6987777	1	Dsec\GM17528	scaffold_24	630665	632618	1	CG43138	Dmau_X	6859189	6859530	+
betaNACtes4	X	14380351	14381416	1	Dsim\GD17171	Scf_X	13476378	13477317	1	Dsec\GM17553	scaffold_20	808941	809591	-1	betaNACtes4	Dmau_X	13314636	13317747	+
CG41099	3R	3846729	3868401	1	Dsim\GD28693	Scf_3L	23085257	23090183	-1
CG10663	3L	12474418	12485035	-1	Dsim\GD12718	Scf_3L	12168273	12179206	-1	Dsec\GM24653	scaffold_0	4652401	4655292	-1	CG10663	Dmau_3L	11934927	11939725	+
subdued	3R	19633418	19642722	-1	Dsim\GD20108	Scf_3R	5798060	5807470	1	Dsec\GM26900	scaffold_25	309767	318310	1	subdued	Dmau_3R	5688451	5697044	+
CG31957	2L	3871271	3872458	-1	Dsim\GD22725	Scf_2L	3722621	3724482	-1	Dsec\GM18117	scaffold_5	1972854	1974420	-1	CG31957	Dmau_2L	3697287	3698931	+
Fer1	3R	7136206	7141972	1	Dsim\GD19915	Scf_3R	2885742	2890662	1	Dsec\GM10936	scaffold_6	3056159	3059886	1	Fer1	Dmau_3R	2795701	2799418	+
tadr	2L	21075405	21081053	1	Dsim\GD24291	Scf_2L	20467995	20473603	1	Dsec\GM23387	scaffold_18	995008	998571	1	tadr	Dmau_2L	20096570	20100050	+
Brms1	X	12907986	12909622	-1	Dsim\GD24527	Scf_X	12146190	12147535	-1						Brms1	Dmau_X	11948808	11949913	+
Ravus	3R	13262733	13264061	-1	Dsim\GD20514	Scf_3R	12083205	12084591	1	Dsec\GM25955	scaffold_0	12914725	12915861	1	Ravus	Dmau_3R	11909378	11910514	+
CG4733	3R	19890689	19898738	1	Dsim\GD19321	Scf_3R	5559252	5567883	-1	Dsec\GM26872	scaffold_25	53393	58938	-1	CG4733	Dmau_3R	5450934	5456592	+
CG9147	2L	6065997	6067635	1	Dsim\GD23383	Scf_2L	5861310	5862942	1	Dsec\GM18599	scaffold_5	4137093	4138377	1	CG9147	Dmau_2L	5818117	5819401	+
CG32069	3L	11062131	11062614	-1	Dsim\GD12834	Scf_3L	10801327	10801848	-1	Dsec\GM24783	scaffold_0	3283070	3283440	-1	CG32069	Dmau_3L	10579665	10580035	+
aru	2L	861849	868354	-1
CG31345	3R	12811145	12817029	-1	Dsim\GD20539	Scf_3R	12515572	12521391	1	Dsec\GM25978	scaffold_0	13329473	13351962	1	CG31345	Dmau_3R	12343825	12346417	+
pAbp	2R	18140078	18147191	1						Dsec\GM21847	scaffold_1	11518904	11522653	1	pAbp	Dmau_2R	12203521	12206763	+
TfIIB	2L	10431338	10433116	1	Dsim\GD23702	Scf_2L	10110319	10112002	1	Dsec\GM18405	scaffold_3	5859276	5860397	1	TfIIB	Dmau_2L	10035896	10037017	+
Jupiter	3R	11590386	11619906	-1	Dsim\GD20653	Scf_3R	13655284	13684572	1	Dsec\GM26090	scaffold_0	14519603	14547783	1	Jupiter	Dmau_3R	13486162	13499136	+
rb	X	4535635	4540626	-1	Dsim\GD16295	Scf_X	4122061	4126978	-1	Dsec\GM12687	scaffold_4	2293319	2296976	1	rb	Dmau_X	4048272	4051927	+
sens-2	2L	6821934	6838995	1	Dsim\GD23433	Scf_2L	6596044	6613194	1	Dsec\GM16223	scaffold_3	2362512	2378130	1	sens-2	Dmau_2L	6551917	6567602	+
CG9609	X	16785115	16787008	-1	Dsim\GD15724	Scf_X	15768369	15770254	-1	Dsec\GM13367	scaffold_17	507768	509043	-1	CG9609	Dmau_X	15565984	15567256	+
bor	3R	16261355	16264115	-1	Dsim\GD20302	Scf_3R	9161361	9163921	1	Dsec\GM15448	scaffold_12	2058144	2060257	1	bor	Dmau_3R	8998446	9000564	+
CG12825	2R	7789206	7789988	1	Dsim\GD10508	Scf_2R	4517959	4518831	1	Dsec\GM20980	scaffold_1	1333262	1333878	1	CG12825	Dmau_2R	2231631	2232253	+
CG9698	3R	30514777	30516980	1	Dsim\GD21527	Scf_3R	25660341	25662789	1	Dsec\GM12888	scaffold_4	5160159	5162170	1	CG9698	Dmau_3R	25361000	25363088	+
ssh	3R	24938710	24944956	-1
Prp8	2R	12154258	12162998	-1	Dsim\GD15250	Scf_2R	8746087	8754833	-1	Dsec\GM20383	scaffold_1	5586948	5595262	-1	Prp8	Dmau_2R	6422979	6431281	+
fwe	3L	15810081	15816410	-1	Dsim\GD12536	Scf_3L	15431396	15437577	-1	Dsec\GM24464	scaffold_0	7912042	7917675	-1	fwe	Dmau_3L	15168515	15173879	+
wrapper	2R	22379637	22382675	1
CG12863	2R	14619798	14621320	-1	Dsim\GD27668	Scf_2R	11209632	11211191	-1						CG12863	Dmau_2R	8782396	8783818	+
CG14154	3L	10641889	10643009	1	Dsim\GD14252	Scf_3L	10381837	10383017	1	Dsec\GM25219	scaffold_0	2856338	2857231	1	CG14154	Dmau_3L	10163649	10164541	+
CG5727	2L	10209853	10210681	-1	Dsim\GD22295	Scf_2L	9887612	9888789	-1	Dsec\GM11944	scaffold_3	5635111	5635724	-1	CG5727	Dmau_2L	9813616	9814229	+
CG13192	2R	11825345	11827097	1	Dsim\GD10815	Scf_2R	8418154	8420150	1	Dsec\GM21306	scaffold_1	5264946	5266293	1	CG13192	Dmau_2R	6096761	6098140	+
CG15530	3R	30177877	30180178	1	Dsim\GD21506	Scf_3R	25349133	25351420	1	Dsec\GM12866	scaffold_4	4856487	4858147	1	CG15530	Dmau_3R	25053989	25055640	+
Nup214	2R	22918937	22924742	-1	Dsim\GD25096	Scf_2R	19288620	19294753	-1	Dsec\GM15600	scaffold_9	2104837	2110647	-1	Nup214	Dmau_2R	16799545	16805152	+
Acon	2L	21168570	21173185	1	Dsim\GD24307	Scf_2L	20563213	20567706	1	Dsec\GM23397	scaffold_18	1090052	1093979	1	Acon	Dmau_2L	20188920	20192849	+
CG10226	3L	6234323	6240068	-1	Dsim\GD13133	Scf_3L	6128787	6134522	-1	Dsec\GM13848	scaffold_2	6193630	6198650	-1	CG10226	Dmau_3L	5950371	5955444	+
Cg25C	2L	5029609	5037279	1
rdx	3R	13967061	14032057	-1	Dsim\GD20464	Scf_3R	11327192	11387717	1	Dsec\GM25894	scaffold_0	12213238	12215285	1	rdx	Dmau_3R	11203512	11214822	+
Rbcn-3A	X	6240745	6255487	-1	Dsim\GD16202	Scf_X	5755369	5770442	-1	Dsec\GM12586	scaffold_4	622689	634461	1	Rbcn-3A	Dmau_X	5651028	5664900	+
Teh4	3L	4174859	4178270	-1	Dsim\GD13287	Scf_3L	4134816	4138355	-1	Dsec\GM14006	scaffold_2	4168185	4170392	-1	Teh4	Dmau_3L	3995741	3997998	+
CG15894	X	6309212	6329828	1	Dsim\GD16795	Scf_X	5823611	5841270	1	Dsec\GM12481	scaffold_4	546414	557930	-1	CG15894	Dmau_X	5728384	5732302	+
CG8005	3L	8198207	8199491	1	Dsim\GD14061	Scf_3L	8000935	8002251	1	Dsec\GM25027	scaffold_0	477504	478668	1	CG8005	Dmau_3L	7809172	7810336	+
Trl	3L	14747929	14761049	-1	Dsim\GD12604	Scf_3L	14390483	14399989	-1	Dsec\GM24533	scaffold_0	6863774	6871180	-1	Trl	Dmau_3L	14136003	14143583	+
CG5466	3R	20617883	20621269	1	Dsim\GD19362	Scf_3R	4860043	4863368	-1	Dsec\GM23124	scaffold_27	290289	292529	-1	CG5466	Dmau_3R	4752866	4755030	+
CG17219	2L	3029253	3030616	1	Dsim\GD23200	Scf_2L	2907905	2909299	1	Dsec\GM16957	scaffold_13503	10	420	1	CG17219	Dmau_2L	2884600	2885575	+
LpR2	3R	25698727	25740465	-1	Dsim\GD18174	Scf_3R	21072165	21094472	-1	Dsec\GM10225	scaffold_13	315061	353172	-1	LpR2	Dmau_3R	20760941	20791290	+
ppk8	X	3557812	3572000	1	Dsim\GD28023	Scf_X	3199491	3201815	1	Dsec\GM12297	scaffold_4	3208023	3211520	-1	ppk8	Dmau_X	3166225	3168525	+
CG11674	X	14224647	14225879	-1	Dsim\GD15858	Scf_X	13318130	13319387	-1	Dsec\GM17565	scaffold_20	722609	723716	-1	CG11674	Dmau_X	13178950	13180057	+
CG18094	2L	19490262	19491679	1	Dsim\GD24212	Scf_2L	18985880	18987277	1	Dsec\GM17354	scaffold_7	3105677	3106818	1	CG18094	Dmau_2L	18703521	18704664	+
scf	3L	1298672	1300389	1	Dsim\GD13605	Scf_3L	1222358	1223742	1	Dsec\GM12990	scaffold_6182	702	1829	1	scf	Dmau_3L	1201779	1202908	+
IM23	2R	18382704	18383235	-1	Dsim\GD29046	Scf_2R	14892425	14892923	-1	Dsec\GM19911	scaffold_1	11745174	11745589	-1	IM23	Dmau_2R	12428682	12429097	+
AP-2mu	3R	22462455	22464603	1	Dsim\AP-50	Scf_3R	17811437	17813597	1	Dsec\GM26435	scaffold_0	18641677	18643114	1	AP-2mu	Dmau_3R	17582436	17583861	+
CG11309	3L	21301785	21304658	-1	Dsim\GD12125	Scf_3L	20737010	20739618	-1	Dsec\GM26924	scaffold_11	1241856	1243297	-1	CG11309	Dmau_3L	20355121	20356535	+
CG7632	3L	21304697	21306197	1	Dsim\GD14950	Scf_3L	20739622	20741138	1	Dsec\GM22356	scaffold_11	1244194	1245242	1	CG7632	Dmau_3L	20357429	20358480	+
CG14006	2L	5726415	5728811	-1	Dsim\GD28172	Scf_2L	5531716	5533403	-1	Dsec\GM18002	scaffold_5	3807147	3807539	-1	CG14006	Dmau_2L	5489303	5490161	+
Gcn2	3R	31395660	31402013	1	Dsim\GD21576	Scf_3R	26513031	26519367	1	Dsec\GM12941	scaffold_4	6026861	6032243	1	Gcn2	Dmau_3R	26212873	26218220	+
PGRP-LE	X	15801153	15803880	-1	Dsim\GD24678	Scf_X	14857431	14859339	-1	Dsec\GM22524	scaffold_37	276005	276205	-1	PGRP-LE	Dmau_X	14661381	14662827	+
Ude	3R	24797460	24799668	-1	Dsim\GD18271	Scf_3R	20137785	20140034	-1	Dsec\GM23464	scaffold_0	20959224	20960765	-1	Ude	Dmau_3R	19872767	19874304	+
MED14	3L	593246	599239	1	Dsim\GD13562	Scf_3L	557360	563494	1	Dsec\GM14346	scaffold_2	613413	618584	1	MED14	Dmau_3L	542172	547343	+
CG14400	2L	20856987	20857891	-1	Dsim\GD21671	Scf_2L	20269161	20270091	-1	Dsec\GM23299	scaffold_18	773792	774532	-1	CG14400	Dmau_2L	19890117	19890857	+
PDZ-GEF	2L	6323767	6332789	1	Dsim\GD23402	Scf_2L	6118981	6127523	1	Dsec\GM18620	scaffold_5	4396055	4401611	1	PDZ-GEF	Dmau_2L	6076626	6081980	+
CG14431	X	6908277	6968829	1	Dsim\GD24761	Scf_X	6396650	6450383	1	Dsec\GM17494	scaffold_24	84047	87573	1	CG14431	Dmau_X	6281319	6322960	+
His1:CG33831	2L	21481345	21482367	1	Dsim\GD24323	Scf_NODE_18371	48	571	1	Dsec\GM11638	scaffold_8402	635	1399	-1
VGlut	2L	2391660	2410662	1	Dsim\GD23154	Scf_2L	2293424	2303650	1	Dsec\GM18340	scaffold_5	575592	580875	1	VGlut	Dmau_2L	2272363	2277751	+
GABPI	2L	3030539	3032300	1	Dsim\GD23201	Scf_2L	2909213	2910990	1	Dsec\GM18389	scaffold_5	1187869	1189243	1	GABPI	Dmau_2L	2885945	2887319	+
Or69a	3L	12964360	12967733	-1	Dsim\GD12685	Scf_3L	12646969	12651299	-1	Dsec\GM24619	scaffold_0	5128404	5132099	-1	Or69a	Dmau_3L	12409590	12410967	+
CG12851	2R	24948645	24955677	1	Dsim\GD11913	Scf_2R	21254128	21260830	1	Dsec\GM11917	scaffold_23	694197	697849	1	CG12851	Dmau_2R	18759780	18763432	+
CG34293	3R	27164708	27165575	-1	Dsim\GD18090	Scf_3R	22432740	22433306	-1	Dsec\GM10128	scaffold_13	1746095	1746410	-1	CG34293	Dmau_3R	22150415	22150730	+
CG14277	2L	8242486	8243426	1	Dsim\GD23518	Scf_2L	7970157	7971082	1	Dsec\GM16865	scaffold_3	3739367	3739992	1	CG14277	Dmau_2L	7921557	7922182	+
Ptth	2L	575711	576896	-1	Dsim\GD22948	Scf_2L	549159	550538	-1	Dsec\GM16653	scaffold_14	558561	559306	-1	Ptth	Dmau_2L	545313	546136	+
ade5	X	12757036	12760617	-1	Dsim\GD15919	Scf_X	11998525	12001154	-1	Dsec\GM11535	scaffold_21	406868	409196	-1
px	2R	22494297	22562065	-1	Dsim\GD25124	Scf_2R	18873398	18936785	-1	Dsec\GM15637	scaffold_9	1669208	1749220	-1	px	Dmau_2R	16392556	16449398	+
CG4213	2L	396595	402198	-1	Dsim\GD22961	Scf_2L	369451	374938	-1	Dsec\GM16672	scaffold_14	380390	385262	-1	CG4213	Dmau_2L	367237	372147	+
CG13743	2R	9044850	9060608	-1	Dsim\GD10110	Scf_2R	5741880	5757181	-1	Dsec\GM19599	scaffold_7980	692	1509	-1	CG13743	Dmau_2R	3450197	3462738	+
Cyp9b2	2R	7130277	7132139	-1	Dsim\GD10273	Scf_2R	3867144	3869015	-1	Dsec\GM20817	scaffold_1	687029	688734	-1	Cyp9b2	Dmau_2R	1608553	1610258	+
CG1146	3L	2488804	2492613	1	Dsim\GD13690	Scf_3L	2376243	2380092	1						CG1146	Dmau_3L	2354797	2355744	+
CG4586	X	6969918	6972265	1	Dsim\GD16824	Scf_X	6452920	6455731	1	Dsec\GM17495	scaffold_24	91999	93808	1	CG4586	Dmau_X	6327166	6329341	+
CG16787	2R	23956335	23957405	-1	Dsim\GD24989	Scf_2R	20299636	20300843	-1	Dsec\GM15487	scaffold_9	3127821	3128582	-1	CG16787	Dmau_2R	17807362	17808123	+
CG9837	3R	8807679	8813579	-1	Dsim\GD20837	Scf_3R	16356513	16357626	1	Dsec\GM26302	scaffold_0	17222015	17222693	1	CG9837	Dmau_3R	16163630	16164314	+
asl	3R	5603236	5606543	-1	Dsim\GD28458	Scf_3R	1324266	1327597	-1	Dsec\GM23129	scaffold_9095	564	1493	-1	asl	Dmau_3R	1306614	1309740	+
emb	2L	8403573	8408853	1	Dsim\GD23540	Scf_2L	8130436	8135241	1	Dsec\GM16937	scaffold_3	3900666	3904328	1	emb	Dmau_2L	8082164	8085818	+
CG12923	2R	9887648	9889485	1	Dsim\GD10695	Scf_2R	6552362	6553641	1	Dsec\GM21164	scaffold_1	3386043	3387017	1	CG12923	Dmau_2R	4250147	4251121	+
EndoGI	2L	16257688	16259511	1
gem	2R	10124293	10137472	1	Dsim\GD10717	Scf_2R	6787819	6801168	1	Dsec\GM21189	scaffold_1	3630511	3640542	1	gem	Dmau_2R	4486348	4495998	+
CG33783	3R	10066770	10067567	1	Dsim\GD18667	Scf_3R	15155228	15156359	-1
CG31265	3R	17128212	17129120	1	Dsim\GD19141	Scf_3R	8305176	8306178	-1	Dsec\GM15210	scaffold_12	1200813	1201613	-1	CG31265	Dmau_3R	8144914	8145714	+
CG6723	3R	11416218	11418668	-1	Dsim\GD20661	Scf_3R	13857297	13859747	1	Dsec\GM26101	scaffold_0	14719505	14721733	1	CG6723	Dmau_3R	13671179	13673407	+
CG2611	2L	20650189	20650898	1	Dsim\GD24272	Scf_2L	20071206	20071832	1	Dsec\GM23361	scaffold_18	570064	570538	1	CG2611	Dmau_2L	19691849	19692323	+
CG34303	3R	10151153	10151697	-1											CG34303	Dmau_3R	14880170	14880711	+
CG33912	3L	20754976	20755685	-1	Dsim\GD12168	Scf_3L	20207812	20208784	-1	Dsec\GM22192	scaffold_11	636034	636746	-1	CG33912	Dmau_3L	19830490	19831201	+
Gel	3R	4235217	4241057	1	Dsim\Gel	Scf_3R	53267	59374	1	Dsec\GM10736	scaffold_6	189432	193570	1	Gel	Dmau_3R	54567	58768	+
RpL8	3L	2587456	2588883	1	Dsim\GD13692	Scf_3L	2474427	2475899	1	Dsec\GM14495	scaffold_2	2607912	2608880	1	RpL8	Dmau_3L	2450911	2451888	+
CG32246	3L	4621219	4622985	1	Dsim\GD13854	Scf_3L	4565994	4569544	1	Dsec\GM14672	scaffold_2	4602848	4605650	1	CG32246	Dmau_3L	4424831	4426511	+
CG3394	2R	24294097	24298111	1	Dsim\GD11850	Scf_2R	20620827	20624903	1	Dsec\GM11851	scaffold_23	62591	64972	1	CG3394	Dmau_2R	18128691	18131148	+
l(1)G0045	X	5622648	5625493	1
CG12681	X	4875670	4877263	1
CG13405	3L	73945	75332	-1	Dsim\GD13541	Scf_3L	53492	54564	-1	Dsec\GM14303	scaffold_2	108761	109327	-1	CG13405	Dmau_3L	44770	45323	+
CG9743	3R	30196360	30202998	-1	Dsim\GD17212	Scf_3R	25367577	25374266	-1	Dsec\GM12168	scaffold_4	4874849	4877078	-1	CG9743	Dmau_3R	25072620	25074827	+
CG42666	X	1773719	1853667	1
Pino	2L	1114654	1128953	-1	Dsim\GD22927	Scf_2L	1062249	1076202	-1	Dsec\GM16627	scaffold_14	1068999	1081416	-1	Pino	Dmau_2L	1056845	1069214	+
pav	3L	4242734	4246233	1	Dsim\pav	Scf_3L	4202380	4205882	1	Dsec\GM14638	scaffold_2	4239955	4242912	1	pav	Dmau_3L	4063346	4066240	+
eas	X	16278328	16285618	1	Dsim\GD24830	Scf_X	15280708	15287965	1	Dsec\GM13416	scaffold_17	1603	6054	1	eas	Dmau_X	15082015	15086166	+
CG33017	2R	16272114	16277655	1	Dsim\GD11177	Scf_2R	12829464	12834581	1	Dsec\GM21677	scaffold_1	9659355	9664284	1	CG33017	Dmau_2R	10385630	10389361	+
CG11211	2R	6180926	6181626	-1	Dsim\GD10332	Scf_2R	3064930	3065626	-1	Dsec\GM16478	scaffold_26	711332	711930	-1	CG11211	Dmau_2R	883323	883961	+
CG8195	2R	15562697	15565801	-1	Dsim\GD25611	Scf_2R	12115356	12118516	-1	Dsec\GM20134	scaffold_1	8941231	8942873	-1	CG8195	Dmau_2R	9687617	9689259	+
CG14701	3R	11231912	11232539	1	Dsim\GD20671	Scf_3R	14034171	14034814	-1	Dsec\GM23929	scaffold_0	14900682	14901080	-1	CG14701	Dmau_3R	13845569	13845967	+
Cdk2	3R	20735623	20738414	1	Dsim\GD19371	Scf_3R	4743169	4744888	-1	Dsec\GM23132	scaffold_27	173150	174581	-1	Cdk2	Dmau_3R	4635225	4636648	+
CG7582	3R	29680241	29682278	-1	Dsim\GD17691	Scf_3R	24863752	24865752	-1	Dsec\GM12231	scaffold_4	4361004	4362348	-1	CG7582	Dmau_3R	24570400	24571763	+
wuc	2R	12700081	12700851	1	Dsim\GD10914	Scf_2R	9296855	9297839	1	Dsec\GM21418	scaffold_1	6133870	6134331	1	wuc	Dmau_2R	6965052	6965513	+
gogo	3L	20268859	20295133	-1	Dsim\GD12205	Scf_3L	19743692	19770375	-1	Dsec\GM22234	scaffold_11	171900	181527	-1	gogo	Dmau_3L	19373802	19384028	+
Osi6	3R	6234708	6237181	1
CG3290	2R	22206005	22207987	-1
CG42544	3R	7304592	7304954	1
CG15735	X	12018640	12020719	1
CG33796	3L	16169455	16170106	-1	Dsim\GD12508	Scf_3L	15782846	15783491	-1						CG33796	Dmau_3L	15517130	15517790	+
SkpE	X	19823368	19824080	-1	Dsim\GD17469	Scf_X	18578836	18579583	1	Dsec\GM22995	scaffold_8	1973316	1973822	1
knrl	3L	20597141	20620659	-1	Dsim\GD12173	Scf_3L	20051416	20074028	-1	Dsec\GM22199	scaffold_11	481079	500158	-1	knrl	Dmau_3L	19676551	19695546	+
CG9386	3R	9553696	9555408	-1	Dsim\GD27029	Scf_3R	15645380	15647227	1	Dsec\GM26247	scaffold_0	16515831	16517456	1	CG9386	Dmau_3R	15456516	15458141	+
CG43740	X	10333652	10347794	1	Dsim\GD24701	Scf_X	9696969	9711080	1	Dsec\GM11419	scaffold_15	944143	947331	1	CG43740	Dmau_X	9536861	9561083	+
CG6364	3R	24290172	24293371	1	Dsim\GD21086	Scf_3R	19648117	19651336	1	Dsec\GM26584	scaffold_0	20450265	20451633	1	CG6364	Dmau_3R	19373077	19376094	+
CG32638	X	13122876	13128794	-1	Dsim\GD15907	Scf_X	12353435	12359114	-1	Dsec\GM11514	scaffold_21	769324	774354	-1	CG32638	Dmau_X	12152374	12156728	+
CG13773	2L	6906666	6907844	-1	Dsim\GD22536	Scf_2L	6675086	6676172	-1	Dsec\GM13771	scaffold_3	2440567	2441451	-1	CG13773	Dmau_2L	6630202	6631073	+
CG1138	3R	6596625	6598022	-1	Dsim\GD19542	Scf_3R	2320197	2321380	-1	Dsec\GM10546	scaffold_6	2516730	2517638	-1	CG1138	Dmau_3R	2255324	2256232	+
CG8668	2L	8127001	8133989	1	Dsim\GD23505	Scf_2L	7854214	7861238	1	Dsec\GM16754	scaffold_3	3627869	3630124	1	CG8668	Dmau_2L	7810244	7812513	+
CG9766	3R	4269221	4277928	-1	Dsim\GD19692	Scf_3R	80151	82237	-1	Dsec\GM10717	scaffold_6	215345	216041	-1	CG9766	Dmau_3R	80252	81727	+
qtc	2L	5060815	5070750	1
CG6439	3R	22016391	22019382	-1
Or35a	2L	15622068	15623558	-1
CG4806	2R	24666158	24668343	-1	Dsim\GD24928	Scf_2R	20980929	20983140	-1	Dsec\GM11803	scaffold_23	419392	421468	-1	CG4806	Dmau_2R	18486156	18488247	+
betaggt-I	2L	4945579	4948324	1	Dsim\GD23309	Scf_2L	4759129	4761914	1	Dsec\GM18504	scaffold_5	3032591	3034184	1	betaggt-I	Dmau_2L	4727192	4729166	+
CG43736	X	6863888	6881580	1	Dsim\GD16821	Scf_X	6353884	6365337	1	Dsec\GM12542	scaffold_4	22623	31860	-1	CG43736	Dmau_X	6231876	6241152	+
ms(3)K81	3R	26875852	26876562	1	Dsim\ms(3)K81	Scf_3R	22161861	22162565	1	Dsec\ms(3)K81	scaffold_13	1475049	1475600	1	ms(3)K81	Dmau_3R	21880085	21880636	+
Bsg	2L	8083420	8116531	1	Dsim\GD23503	Scf_2L	7810652	7843019	1	Dsec\GM16732	scaffold_3	3586348	3606892	1	Bsg	Dmau_2L	7768651	7789390	+
CG42671	3L	11214505	11230745	1	Dsim\GD14297	Scf_3L	10948120	10962849	1	Dsec\GM25263	scaffold_0	3432115	3442611	1	CG42671	Dmau_3L	10728366	10740638	+
CG30495	2R	7656895	7659061	1	Dsim\GD10498	Scf_2R	4385812	4387310	1	Dsec\GM20969	scaffold_1	1201717	1202942	1	CG30495	Dmau_2R	2100054	2101279	+
Nse4	2L	10439440	10441047	1	Dsim\GD23706	Scf_2L	10118396	10119640	1	Dsec\GM18438	scaffold_3	5867377	5868480	1	Nse4	Dmau_2L	10044041	10045142	+
Pol32	2L	15254819	15256304	-1	Dsim\GD21967	Scf_2L	14854453	14855915	-1	Dsec\GM14500	scaffold_3	1516699	1518000	-1
Gr36c	2L	17180338	17181632	1	Dsim\GD15205	Scf_2R	19468598	19470337	-1	Dsec\GM17227	scaffold_7	808465	809760	1	Gr36c	Dmau_2L	16460855	16462150	+
plum	3R	26470078	26535217	-1	Dsim\GD18134	Scf_3R	21771720	21828161	-1	Dsec\GM10182	scaffold_13	1090189	1095272	-1	plum	Dmau_3R	21494168	21499006	+
CG8378	2R	12140631	12143272	1
CG10208	3R	23772998	23774127	-1	Dsim\GD18352	Scf_3R	19149365	19150607	-1	Dsec\GM23538	scaffold_0	19957053	19957949	-1	CG10208	Dmau_3R	18879934	18880830	+
CG42359	3R	19161259	19162300	-1	Dsim\GD27802	Scf_3R	6270129	6271170	1						CG42359	Dmau_3R	6155098	6155499	+
Cyp4d14	X	2173415	2175315	-1	Dsim\GD16387	Scf_X	1904792	1907324	-1	Dsec\GM18911	scaffold_10	1851043	1852779	-1	Cyp4d14	Dmau_X	1878910	1880647	+
CG15286	2L	14338240	14340080	1
CG11655	X	15453471	15455551	1	Dsim\GD17211	Scf_X	14498444	14500503	1	Dsec\GM19565	scaffold_73	37394	39054	1	CG11655	Dmau_X	14319803	14321471	+
vvl	3L	6790158	6794941	1	Dsim\GD13969	Scf_3L	6656488	6660397	1	Dsec\GM14797	scaffold_2	6718309	6721745	1	vvl	Dmau_3L	6475958	6478093	+
CG14966	3L	3197045	3197631	-1	Dsim\GD13347	Scf_3L	3094172	3094869	-1	Dsec\GM14073	scaffold_2	3190298	3190684	-1	CG14966	Dmau_3L	3028046	3028468	+
hdc	3R	30277932	30372382	1	Dsim\GD21513	Scf_3R	25447794	25522827	1	Dsec\GM12874	scaffold_4	4954801	5027115	1	hdc	Dmau_3R	25199204	25227141	+
CG10898	3R	11557776	11559877	1	Dsim\GD18763	Scf_3R	13715135	13717362	-1	Dsec\GM23952	scaffold_0	14579852	14580940	-1	CG10898	Dmau_3R	13530695	13531787	+
Gbs-76A	3L	19281364	19292766	-1	Dsim\GD12288	Scf_3L	18833520	18844053	-1	Dsec\GM14881	scaffold_19	1229421	1232180	-1	Gbs-76A	Dmau_3L	18480403	18482559	+
CG4646	2R	13219396	13220251	-1	Dsim\GD25779	Scf_2R	9774463	9775217	-1	Dsec\GM20298	scaffold_1	6629881	6630431	-1	CG4646	Dmau_2R	7438180	7438730	+
CG8004	3L	19927194	19928508	-1	Dsim\GD12238	Scf_3L	19412058	19413590	-1	Dsec\GM15407	scaffold_29	565140	566018	-1	CG8004	Dmau_3L	19048366	19049244	+
Osi8	3R	6255175	6256602	1	Dsim\GD19849	Scf_3R	1980736	1982164	1	Dsec\GM10869	scaffold_6	2166927	2168043	1	Osi8	Dmau_3R	1925016	1926046	+
piwi	2L	10982205	10987420	-1	Dsim\GD22206	Scf_2L	10639432	10644775	-1	Dsec\GM11236	scaffold_3	6383643	6388675	-1	piwi	Dmau_2L	10557898	10562664	+
CG14968	3L	3299336	3303112	-1	Dsim\GD13335	Scf_3L	3196206	3200010	-1	Dsec\GM14060	scaffold_2	3291831	3293180	-1	CG14968	Dmau_3L	3130021	3131348	+
CG32698	X	9783223	9855449	1	Dsim\GD16965	Scf_X	9214739	9267876	1	Dsec\GM11388	scaffold_15	485998	498181	1	CG32698	Dmau_X	9069624	9085865	+
CG43816	2L	16004325	16005461	1	Dsim\GD24035	Scf_2L	15542907	15543849	1						CG43816	Dmau_2L	15327115	15327276	+
CG4763	2R	23823357	23824868	-1	Dsim\GD25010	Scf_2R	20174296	20177802	-1	Dsec\GM15508	scaffold_9	3003025	3004539	-1	CG4763	Dmau_2R	17682326	17683818	+
moody	X	2044292	2050120	-1	Dsim\GD26931	Scf_X	1780481	1786382	-1	Dsec\GM18925	scaffold_10	1724041	1726547	-1	moody	Dmau_X	1754452	1756958	+
shg	2R	21049654	21057197	-1	Dsim\GD25232	Scf_2R	17450169	17457548	-1	Dsec\GM15758	scaffold_9	268422	274175	-1	shg	Dmau_2R	14973648	14979404	+
CG15482	2L	13210773	13211814	-1	Dsim\GD22079	Scf_2L	12792174	12793550	-1	Dsec\GM25790	scaffold_16	1365291	1366223	-1	CG15482	Dmau_2L	12705122	12706048	+
CG17098	2L	10651613	10654499	1	Dsim\GD23721	Scf_2L	10326831	10329659	1	Dsec\GM18648	scaffold_3	6069866	6071980	1	CG17098	Dmau_2L	10245959	10248069	+
CG13692	2L	421771	422489	1	Dsim\GD23024	Scf_2L	394454	395286	1	Dsec\GM16741	scaffold_14	405686	406321	1	CG13692	Dmau_2L	392449	393084	+
Gpo-1	2R	15857752	15862755	-1	Dsim\GD25593	Scf_2R	12415668	12420648	-1	Dsec\GM20116	scaffold_1	9239967	9242719	-1	Gpo-1	Dmau_2R	9981014	9983849	+
CG3348	3R	27291535	27292209	-1	Dsim\GD18082	Scf_3R	22558657	22559956	-1	Dsec\GM10110	scaffold_13	1871544	1871840	-1	CG3348	Dmau_3R	22276346	22276642	+
Pxd	3R	17014576	17027987	1	Dsim\GD19129	Scf_3R	8406685	8421997	-1	Dsec\GM15197	scaffold_12	1301945	1304439	-1	Pxd	Dmau_3R	8246336	8248828	+
His2A:CG33847	2L	21508566	21509058	1	Dsim\GD24469	Scf_NODE_42015	2095	2436	1	Dsec\GM13169	scaffold_710	161	535	1	His2A:CG33847	Dmau_2L	20408446	20408762	-
TfIIFalpha	3R	6380467	6382604	1	Dsim\GD19872	Scf_3R	2106743	2109014	1	Dsec\GM10893	scaffold_6	2291165	2293089	1	TfIIFalpha	Dmau_3R	2048731	2050649	+
mam	2R	13991203	14060356	1	Dsim\GD11001	Scf_2R	10566998	10669709	1	Dsec\GM21505	scaffold_1	7450484	7470816	1	mam	Dmau_2R	8211974	8258847	+
NT1	3L	4501652	4508433	-1	Dsim\NT1	Scf_3L	4446912	4453673	-1	Dsec\NT1	scaffold_2	4484672	4486878	-1	NT1	Dmau_3L	4306110	4309999	+
Cpsf73	3R	18661121	18663552	-1	Dsim\GD20157	Scf_3R	6768042	6770474	1	Dsec\GM18692	scaffold_5	5411534	5413832	1	Cpsf73	Dmau_3R	6647258	6649556	+
CG44005	3L	18070300	18072123	-1	Dsim\GD28512	Scf_3L	17619230	17620613	-1	Dsec\GM14957	scaffold_19	59210	60742	-1	CG44005	Dmau_3L	17315130	17316649	+
CG10591	3L	5598557	5599692	-1	Dsim\GD13185	Scf_3L	5504401	5505530	-1	Dsec\GM13908	scaffold_2	5528036	5529035	-1	CG10591	Dmau_3L	5335391	5336390	+
inaF-B	X	11724668	11732770	-1	Dsim\GD15974	Scf_X	11004688	11010049	-1	Dsec\GM13049	scaffold_36	315371	315616	-1	inaF-B	Dmau_X	10829671	10829916	+
Cyp317a1	2R	14898312	14903095	1	Dsim\GD11088	Scf_2R	11480070	11482559	1	Dsec\GM21582	scaffold_1	8300609	8302165	1	Cyp317a1	Dmau_2R	9055183	9056739	+
CG10979	3R	5794705	5799994	1	Dsim\GD19823	Scf_3R	1509304	1514088	1	Dsec\GM10842	scaffold_6	1728802	1732230	1	CG10979	Dmau_3R	1490855	1494278	+
CG42823	3R	17404487	17405109	-1	Dsim\GD20234	Scf_3R	8030573	8031585	1	Dsec\GM15365	scaffold_12	916911	917481	1	CG42823	Dmau_3R	7871873	7872443	+
CG42789	3R	26783609	26784208	-1	Dsim\GD18118	Scf_3R	22069205	22069802	-1	Dsec\GM10164	scaffold_13	1383658	1383873	-1
CG13075	3L	16083993	16085264	1	Dsim\GD14593	Scf_3L	15694307	15695372	1	Dsec\GM25581	scaffold_0	8175362	8176236	1	CG13075	Dmau_3L	15431665	15432790	+
CG17234	2L	2253045	2253852	1	Dsim\GD23142	Scf_2L	2147842	2148646	1	Dsec\GM18245	scaffold_5	426976	427728	-1	CG17234	Dmau_2L	2125755	2126510	+
okr	2L	2989594	2992759	-1	Dsim\GD12001	Scf_2L	2866880	2870178	-1	Dsec\GM18177	scaffold_5	1145846	1149428	-1	okr	Dmau_2L	2843958	2846542	+
Tgi	3L	13486797	13502492	1	Dsim\GD14454	Scf_3L	13183530	13199223	1	Dsec\GM25426	scaffold_0	5664047	5670270	1	Tgi	Dmau_3L	12940865	12947085	+
pn	X	2181211	2182916	1	Dsim\GD16595	Scf_X	1912887	1914625	1	Dsec\GM19207	scaffold_10	1858858	1860144	1	pn	Dmau_X	1886764	1888049	+
CG33631	3R	10064007	10064645	1	Dsim\GD18665	Scf_3R	15159870	15160727	-1	Dsec\GM18754	scaffold_754	856	1560	-1	CG33631	Dmau_3R	14966045	14966682	+
CG43366	2R	5893895	5931363	1	Dsim\GD15334	Scf_2R	2734674	2767195	1	Dsec\GM16527	scaffold_26	454787	457417	1	CG43366	Dmau_2R	632486	642265	+
CG11658	3L	11699496	11708553	-1	Dsim\GD12782	Scf_3L	11401055	11409474	-1	Dsec\GM24720	scaffold_0	3880133	3886657	-1	CG11658	Dmau_3L	11175015	11181676	+
CG33123	2L	3510328	3514656	-1
CG17944	3R	7361368	7362123	-1	Dsim\GD19484	Scf_3R	3106153	3106939	-1	Dsec\GM10485	scaffold_6	3273621	3274025	-1	CG17944	Dmau_3R	3019791	3020393	+
CG4239	X	16385278	16388702	1	Dsim\GD17283	Scf_X	15377365	15380632	1	Dsec\GM13434	scaffold_17	100944	101888	1	CG4239	Dmau_X	15177216	15178159	+
Eb1	2R	6749227	6756300	1
CG14352	2L	1611410	1612576	1	Dsim\GD23105	Scf_2L	1545411	1546565	1	Dsec\GM16825	scaffold_14	1554537	1555453	1	CG14352	Dmau_2L	1536201	1537117	+
His4:CG31611	2L	21424593	21425005	-1	Dsim\GD18968	Scf_3R	10757882	10758774	-1	Dsec\GM19606	scaffold_12634	407	700	1
CG5835	3R	19148632	19153686	-1	Dsim\GD20132	Scf_3R	6278805	6283832	1	Dsec\GM10045	scaffold_25	781378	785765	1	CG5835	Dmau_3R	6163360	6167754	+
Drl-2	2R	13055246	13079539	-1	Dsim\GD10938	Scf_2R	9623226	9636216	-1	Dsec\GM20315	scaffold_1	6461873	6476529	-1	Drl-2	Dmau_2R	7290679	7298550	+
CycG	3R	31596642	31612664	-1	Dsim\GD15071	Scf_3R	26703015	26716456	-1	Dsec\GM16426	scaffold_31	85476	88383	-1	CycG	Dmau_3R	26399748	26402654	+
CG1265	3L	4254776	4256053	1	Dsim\GD13827	Scf_3L	4214372	4215684	1	Dsec\GM14639	scaffold_2	4251830	4252939	1	CG1265	Dmau_3L	4075205	4076308	+
SMC5	3L	21569176	21573523	1	Dsim\GD14975	Scf_3L	20977963	20982393	1	Dsec\GM22385	scaffold_11	1482653	1486734	1	SMC5	Dmau_3L	20599988	20604070	+
CG31950	2L	2878344	2879001	1	Dsim\GD23192	Scf_2L	2758509	2759187	1	Dsec\GM18377	scaffold_5	1037447	1037812	1	CG31950	Dmau_2L	2735403	2735768	+
CG13631	3R	24769351	24770933	1	Dsim\GD21127	Scf_3R	20110094	20111695	1	Dsec\GM26623	scaffold_0	20931289	20931540	1	CG13631	Dmau_3R	19844870	19845121	+
CG14868	3R	15367816	15369945	-1	Dsim\GD15100	Scf_3R	10033294	10035434	1	Dsec\GM25774	scaffold_0	10752364	10753207	1	CG14868	Dmau_3R	9865377	9867218	+
Cpr12A	X	13543643	13544907	1	Dsim\GD17132	Scf_X	12763062	12764348	1	Dsec\GM17614	scaffold_20	70705	71628	1	Cpr12A	Dmau_X	12550998	12551944	+
Tengl2	2L	2238304	2239384	-1	Dsim\GD22855	Scf_2L	2131927	2133024	-1	Dsec\GM18249	scaffold_5	413344	414352	-1	Tengl2	Dmau_2L	2109662	2110675	+
CG14237	3R	26456877	26457242	1
Tsp42Ec	2R	7006442	7008622	1	Dsim\GD10443	Scf_2R	3744383	3746612	1	Dsec\GM20914	scaffold_1	559869	561657	1	Tsp42Ec	Dmau_2R	1486119	1487887	+
Doc3	3L	9005196	9007249	1	Dsim\GD14148	Scf_3L	8781985	8784537	1	Dsec\GM25112	scaffold_0	1269164	1270815	1	Doc3	Dmau_3L	8585237	8586888	+
CG4203	3R	15209204	15211347	1
lute	3R	17379944	17390265	1	Dsim\GD19151	Scf_3R	8045634	8055821	-1	Dsec\GM15225	scaffold_12	933804	936668	-1	lute	Dmau_3R	7887551	7890583	+
Pih1D1	2L	12713276	12721843	-1	Dsim\GD22098	Scf_2L	12323092	12331838	-1	Dsec\GM25987	scaffold_16	897665	906082	-1	Pih1D1	Dmau_2L	12239947	12247242	+
Cpr62Bb	3L	1832636	1835164	-1	Dsim\GD17606	Scf_3L	1742078	1744716	-1	Dsec\GM14164	scaffold_2	1858688	1860834	-1	Cpr62Bb	Dmau_3L	1719140	1721248	+
Gr98a	3R	27487927	27489968	1	Dsim\GD21337	Scf_3R	22746391	22748498	1	Dsec\GM10394	scaffold_13	2058041	2058428	1	Gr98a	Dmau_3R	22462594	22462697	+
CASK	3R	21783400	21822674	-1	Dsim\GD18503	Scf_3R	17121681	17184719	-1	Dsec\GM23691	scaffold_0	18014198	18018802	-1	CASK	Dmau_3R	16923835	16929410	+
mRpS18C	3R	30423974	30424556	1	Dsim\GD21516	Scf_3R	25568765	25569367	1	Dsec\GM12877	scaffold_4	5074336	5074813	1	mRpS18C	Dmau_3R	25273247	25273724	+
CG31542	3R	5369540	5371744	1	Dsim\GD19779	Scf_3R	1094392	1095034	1	Dsec\GM10802	scaffold_6	1312310	1312968	1	CG31542	Dmau_3R	1077737	1078404	+
CG32104	3L	12393804	12399322	-1	Dsim\GD12725	Scf_3L	12087380	12092895	-1	Dsec\GM24662	scaffold_0	4570918	4576347	-1	CG32104	Dmau_3L	11853867	11859244	+
TfIIS	2L	15058919	15060757	-1	Dsim\GD21971	Scf_2L	14572296	14573756	-1	Dsec\GM14545	scaffold_3	1321803	1322806	-1	TfIIS	Dmau_2L	14474939	14475942	+
RhoGAP54D	2R	17586425	17590884	-1	Dsim\GD25460	Scf_2R	14121455	14125898	-1	Dsec\GM19966	scaffold_1	10973547	10977211	-1	RhoGAP54D	Dmau_2R	11662537	11666210	+
Amnionless	2L	287252	289144	-1	Dsim\GD22969	Scf_2L	273398	277003	-1	Dsec\GM16681	scaffold_14	285126	286634	-1	Amnionless	Dmau_2L	271375	272883	+
D12	2L	8434058	8437365	-1
GC2	3R	11971694	11972896	1	Dsim\GD28871	Scf_3R	13308579	13309837	-1	Dsec\GM23991	scaffold_0	14171771	14172873	-1	GC2	Dmau_3R	13127116	13128199	+
CG8420	3R	9246649	9251431	1	Dsim\GD18597	Scf_3R	15936279	15940806	-1	Dsec\GM23786	scaffold_0	16805108	16808839	-1	CG8420	Dmau_3R	15745887	15749621	+
HLH106	3L	19793935	19798979	1
Cpr65Ay	3L	6158075	6158630	-1	Dsim\GD13142	Scf_3L	6061680	6062240	-1	Dsec\GM13859	scaffold_2	6095106	6095550	-1	Cpr65Ay	Dmau_3L	5885451	5885828	+
CG34135	3R	8749206	8768191	-1						Dsec\GM26316	scaffold_0	17280208	17280882	1	CG34135	Dmau_3R	16222082	16222750	+
CG14971	3L	3468023	3471309	-1	Dsim\GD13327	Scf_3L	3364856	3368051	-1	Dsec\GM14050	scaffold_2	3461420	3463644	-1	CG14971	Dmau_3L	3299038	3301069	+
hay	3L	10631079	10633969	1	Dsim\GD14248	Scf_3L	10371412	10374060	1	Dsec\GM25215	scaffold_0	2845811	2848336	1	hay	Dmau_3L	10153146	10155671	+
CG5618	3L	20353449	20356632	1	Dsim\GD14877	Scf_3L	19814041	19816744	1	Dsec\GM22279	scaffold_11	241038	243324	1	CG5618	Dmau_3L	19442644	19444929	+
CG10859	2L	13396392	13398664	-1	Dsim\GD22061	Scf_2L	12975942	12978204	-1	Dsec\GM25543	scaffold_16	1555110	1557057	-1	CG10859	Dmau_2L	12887564	12889511	+
CG14384	3R	12965938	12967712	-1	Dsim\GD20532	Scf_3R	12372414	12373287	1						CG14384	Dmau_3R	12197968	12198571	+
PGRP-SC1b	2R	8713446	8715094	1	Dsim\PGRP-SC1b	Scf_2R	5416069	5416709	1	Dsec\GM21060	scaffold_1	2245381	2245938	1
CG4362	3R	20306216	20307537	-1	Dsim\GD28897	Scf_3R	5170258	5172130	1	Dsec\GM23200	scaffold_27	604498	605660	1	CG4362	Dmau_3R	5063453	5064647	+
Bx42	X	9103870	9106604	-1	Dsim\GD24563	Scf_X	8533038	8535597	-1	Dsec\GM13680	scaffold_34	358732	360672	-1	Bx42	Dmau_X	8369510	8371452	+
vir	2R	23360192	23366355	-1	Dsim\GD25058	Scf_2R	19725715	19731976	-1	Dsec\GM15555	scaffold_9	2542267	2548212	-1	vir	Dmau_2R	17235503	17241373	+
CG15526	3R	30055957	30056603	1	Dsim\GD21501	Scf_3R	25227849	25228521	1	Dsec\GM12859	scaffold_4	4727884	4728311	1	CG15526	Dmau_3R	24933091	24933516	+
CG12885	3R	27520866	27533934	1	Dsim\GD21338	Scf_3R	22761537	22783140	1	Dsec\GM10396	scaffold_13	2089840	2093337	1	CG12885	Dmau_3R	22494849	22497459	+
Prat	3R	7909598	7911779	-1	Dsim\GD19452	Scf_3R	3623366	3625562	-1	Dsec\GM10447	scaffold_6	3805447	3807090	-1	Prat	Dmau_3R	3526974	3528610	+
beat-VII	3R	26645282	26681966	-1	Dsim\GD18125	Scf_3R	21930495	21967235	-1	Dsec\GM10173	scaffold_13	1261587	1269127	-1	beat-VII	Dmau_3R	21653728	21685843	+
Sr-CIV	2L	3522521	3524056	-1	Dsim\Sr-CIV	Scf_2L	3381988	3383660	-1	Dsec\GM18140	scaffold_5	1625064	1626298	-1	Sr-CIV	Dmau_2L	3357038	3358397	+
rempA	2L	553742	560310	-1	Dsim\GD22951	Scf_2L	527165	532982	-1	Dsec\GM16659	scaffold_14	536598	540523	-1	rempA	Dmau_2L	523379	528193	+
Mdr50	2R	14246966	14252597	1	Dsim\GD11033	Scf_2R	10837327	10842977	1	Dsec\GM21523	scaffold_1	7642129	7647463	1	Mdr50	Dmau_2R	8424532	8429898	+
PH4alphaPV	3R	30646106	30648551	-1	Dsim\GD16902	Scf_3R	25791987	25921159	-1	Dsec\GM12139	scaffold_4	5298799	5300860	-1	PH4alphaPV	Dmau_3R	25492625	25494684	+
ced-6	2R	9434669	9444937	-1
CG6379	X	4097592	4101031	-1	Dsim\GD16313	Scf_X	3678149	3681243	-1	Dsec\GM12706	scaffold_4	2727757	2730223	1	CG6379	Dmau_X	3631717	3634183	+
Clect27	2L	4796600	4801923	-1	Dsim\GD22691	Scf_2L	4617025	4622264	-1	Dsec\GM18074	scaffold_5	2893165	2895931	-1	Clect27	Dmau_2L	4587222	4589975	+
CG31606	2L	8147611	8148356	1	Dsim\GD23506	Scf_2L	7873238	7875900	1	Dsec\GM16765	scaffold_3	3644919	3645568	1	CG31606	Dmau_2L	7826849	7827496	+
TwdlH	3R	26633732	26634714	1	Dsim\GD21294	Scf_3R	21919182	21920158	1	Dsec\GM10334	scaffold_13	1234226	1235014	1	TwdlH	Dmau_3R	21638510	21639298	+
Shawn	X	19611526	19615617	1	Dsim\GD24876	Scf_X	18387331	18391492	1	Dsec\GM22972	scaffold_8	1788680	1790108	1	Shawn	Dmau_X	18306200	18307628	+
Cals	4	1112874	1123357	-1	Dsim\GD24359	Scf_4	918630	927421	-1	Dsec\GM13009	scaffold_40	182285	187368	-1	Cals	Dmau_4	973610	979383	+
dar1	3L	3626352	3653442	1	Dsim\GD29486	Scf_3L	3517622	3544146	1	Dsec\GM14583	scaffold_2	3613022	3638951	1	dar1	Dmau_3L	3451437	3476997	+
Snm1	3R	5555084	5557786	1	Dsim\GD19792	Scf_3R	1275803	1278876	1						Snm1	Dmau_3R	1258076	1260505	+
h	3L	8675759	8679253	1	Dsim\h	Scf_3L	8457751	8461469	1	Dsec\GM25080	scaffold_0	947177	949338	1	h	Dmau_3L	8261869	8264032	+
trbd	3R	9705996	9711037	-1	Dsim\GD29410	Scf_3R	15497448	15502096	1	Dsec\GM26227	scaffold_0	16369824	16372573	1	trbd	Dmau_3R	15310304	15311842	+
CG13463	3L	15054777	15055565	1
fh	X	9148080	9149071	-1	Dsim\GD16083	Scf_X	8576187	8577258	-1	Dsec\GM13678	scaffold_34	401260	401898	-1	fh	Dmau_X	8412289	8412923	+
rl	2R	1071462	1125927	1						Dsec\GM16932	scaffold_81	89199	120955	1
Dh44	3R	9638182	9650706	1	Dsim\GD18635	Scf_3R	15550385	15560502	-1	Dsec\GM23824	scaffold_0	16421796	16428121	-1	Dh44	Dmau_3R	15362355	15368604	+
CG16789	3R	9566195	9569189	1	Dsim\GD18626	Scf_3R	15631718	15634685	-1	Dsec\GM23817	scaffold_0	16502262	16504991	-1	CG16789	Dmau_3R	15442917	15445645	+
GstD2	3R	12371971	12372704	1	Dsim\GD18815	Scf_3R	12911980	12913861	-1						GstD2	Dmau_3R	12735380	12736027	+
lola	2R	10481894	10543291	-1	Dsim\lola	Scf_2R	7137903	7198851	-1	Dsec\GM20511	scaffold_1	4007469	4011136	-1
VhaM9.7-d	3R	16975204	16975697	1	Dsim\GD19123	Scf_3R	8454978	8455618	-1	Dsec\GM15188	scaffold_12	1354163	1354429	-1	VhaM9.7-d	Dmau_3R	8295113	8295379	+
Marf	X	6365949	6370924	1	Dsim\GD16797	Scf_X	5872235	5876796	1	Dsec\GM12488	scaffold_4	507822	511302	-1	Marf	Dmau_X	5767401	5770809	+
CG34129	3R	26190234	26191205	-1	Dsim\BG642287	Scf_3R	21505643	21506627	-1	Dsec\GM10192	scaffold_13	801042	803177	-1	CG34129	Dmau_3R	21225827	21226762	+
Cisd2	3R	29222217	29223428	-1	Dsim\GD17906	Scf_3R	24406287	24407529	-1	Dsec\GM12252	scaffold_4	3910888	3911835	-1	Cisd2	Dmau_3R	24117489	24118445	+
CG12902	2R	10354724	10355831	-1	Dsim\GD25994	Scf_2R	7010648	7011771	-1	Dsec\GM20537	scaffold_1	3849708	3849902	-1	CG12902	Dmau_2R	4702759	4702953	+
ADD1	2R	11970686	11977721	1
CG32639	X	13235925	13236566	-1	Dsim\GD15894	Scf_X	12461119	12463059	-1						CG32639	Dmau_X	12255779	12256209	+
Cpr51A	2R	14512559	14515211	-1	Dsim\GD25677	Scf_2R	11098248	11101703	-1	Dsec\GM20207	scaffold_1	7910748	7913248	-1	Cpr51A	Dmau_2R	8674018	8676534	+
CG42812	3R	24367360	24368164	-1	Dsim\GD18294	Scf_3R	19725626	19726459	-1						CG42812	Dmau_3R	19450369	19451138	+
CG13920	3L	1648944	1651501	1	Dsim\GD13635	Scf_3L	1558669	1560984	1	Dsec\GM14433	scaffold_2	1675530	1677300	1	CG13920	Dmau_3L	1535904	1537669	+
CG14204	X	19583617	19587057	1	Dsim\GD17448	Scf_X	18355414	18358424	1	Dsec\GM22967	scaffold_8	1760068	1762119	1	CG14204	Dmau_X	18276070	18278887	+
RpS28b	X	9554623	9555661	1	Dsim\GD16052	Scf_X	8981375	8981961	1	Dsec\GM11375	scaffold_15	215604	215801	1	RpS28b	Dmau_X	8804946	8805143	+
Trh	3L	1190384	1193173	-1	Dsim\GD13494	Scf_3L	1120839	1123683	-1	Dsec\GM14234	scaffold_2	1183461	1185734	-1	Trh	Dmau_3L	1102276	1104548	+
CG31997	4	154654	156060	-1	Dsim\GD24391	Scf_4	123424	124819	-1	Dsec\GM23232	scaffold_52	117303	118425	-1	CG31997	Dmau_4	111895	113023	+
CG18549	3R	12449296	12456355	1	Dsim\GD18839	Scf_3R	12832275	12839366	-1	Dsec\GM24039	scaffold_0	13665672	13672072	-1	CG18549	Dmau_3R	12655953	12662316	+
Arp3	3L	8113407	8115902	-1	Dsim\GD17591	Scf_3L	7916431	7918717	-1	Dsec\GM24973	scaffold_0	394484	396220	-1	Arp3	Dmau_3L	7724765	7726489	+
beta-Spec	X	17657372	17669371	1	Dsim\GD15677	Scf_X	16652756	16664711	1	Dsec\GM13519	scaffold_17	1397841	1402277	1	beta-Spec	Dmau_X	16424720	16432488	+
CG15161	2L	18614339	18616106	-1	Dsim\GD21825	Scf_2L	18135251	18137170	-1	Dsec\GM17080	scaffold_7	2240535	2241952	-1	CG15161	Dmau_2L	17856499	17857925	+
Teh1	3R	9826081	9868120	-1	Dsim\GD20749	Scf_3R	15354898	15381753	1	Dsec\GM26201	scaffold_0	16225480	16250096	1	Teh1	Dmau_3R	15166778	15167598	+
CG4887	2L	1173009	1177589	1	Dsim\GD23080	Scf_2L	1125078	1129841	1	Dsec\GM16803	scaffold_14	1133296	1137440	1	CG4887	Dmau_2L	1114036	1118199	+
CG42511	3R	9404385	9407857	1	Dsim\GD18613	Scf_3R	15795869	15796309	-1	Dsec\GM23970	scaffold_478	10330	10560	1	CG42511	Dmau_3R	15606502	15606732	+
Pxt	3R	17719454	17722955	1	Dsim\GD19183	Scf_3R	7719234	7722718	-1	Dsec\GM15259	scaffold_12	614106	617292	-1	Pxt	Dmau_3R	7569357	7572559	+
CG3984	3R	15137148	15139007	1	Dsim\GD18988	Scf_3R	10259059	10260948	-1	Dsec\GM24198	scaffold_0	10981679	10983238	-1	CG3984	Dmau_3R	10090307	10091461	+
Sgs1	2L	4937409	4941423	1						Dsec\GM18501	scaffold_5	3026608	3028152	1	Sgs1	Dmau_2L	4721631	4722731	+
CG34120	X	21123634	21140951	1	Dsim\GD24885	Scf_X	19719974	19745197	1	Dsec\GM22071	scaffold_370	1184	1882	1
GPHR	2R	15199065	15201200	-1	Dsim\GD25634	Scf_2R	11757419	11759763	-1	Dsec\GM20156	scaffold_1	8580728	8582230	-1	GPHR	Dmau_2R	9331845	9333568	+
CG31806	2L	16984978	16985634	1	Dsim\GD28184	Scf_2L	16503405	16504050	1						CG31806	Dmau_2L	16272434	16272889	+
CG13685	3L	7747344	7750552	1	Dsim\GD14031	Scf_3L	7575554	7580596	1	Dsec\GM24998	scaffold_0	54253	55002	1	CG13685	Dmau_3L	7386624	7387511	+
CG7675	3R	18378124	18381178	-1	Dsim\GD20174	Scf_3R	7073014	7075996	1	Dsec\GM18707	scaffold_5	5692074	5694046	1	CG7675	Dmau_3R	6925955	6927936	+
InR	3R	21570248	21619321	-1	Dsim\GD19971	Scf_3R	3867590	3913206	1	Dsec\GM11002	scaffold_6	4083534	4090439	1
CG7744	2R	19452504	19455527	1	Dsim\GD11456	Scf_2R	15946476	15949613	1	Dsec\GM21962	scaffold_1	12855925	12858383	1	CG7744	Dmau_2R	13471370	13473826	+
lark	3L	7339266	7341893	1	Dsim\GD29539	Scf_3L	7199019	7201540	1						lark	Dmau_3L	7010483	7011884	+
CG33453	2R	19252501	19253228	-1	Dsim\GD24948	Scf_2R	20814395	20815120	-1	Dsec\GM11827	scaffold_23	253005	253697	-1	CG33453	Dmau_2R	13275746	13277688	+
CG42562	2R	17685814	17686410	1	Dsim\GD11302	Scf_2R	14220234	14221039	1	Dsec\GM21811	scaffold_1	11071421	11072856	1	CG42562	Dmau_2R	11760858	11761353	+
CG8664	X	17280918	17282726	-1	Dsim\GD15682	Scf_X	16277822	16278969	-1	Dsec\GM13324	scaffold_17	1021928	1022638	-1	CG8664	Dmau_X	16047289	16047913	+
CG13933	3L	1771809	1775147	-1	Dsim\GD13440	Scf_3L	1681850	1684843	-1	Dsec\GM14171	scaffold_2	1798822	1801015	-1	CG13933	Dmau_3L	1658917	1661108	+
Cad86C	3R	10827079	10849030	1	Dsim\GD18713	Scf_3R	14408252	14432810	-1	Dsec\GM23902	scaffold_0	15277596	15282129	-1	Cad86C	Dmau_3R	14219533	14230155	+
Map60	2R	9590867	9592744	1	Dsim\GD10668	Scf_2R	6263689	6265514	1	Dsec\GM21138	scaffold_1	3093491	3094883	1	Map60	Dmau_2R	3963564	3964956	+
Nep1	X	6091205	6103971	1	Dsim\GD16783	Scf_X	5615593	5627699	1	Dsec\GM12465	scaffold_4	768060	775529	-1	Nep1	Dmau_X	5514908	5522169	+
CG17374	3L	25752859	25762779	-1
CG42732	2R	10322195	10416996	-1
CG34457	2R	16670326	16671836	1	Dsim\GD11212	Scf_2R	13230157	13231668	1	Dsec\GM21716	scaffold_1	10056006	10057879	1	CG34457	Dmau_2R	10775916	10777013	+
Fsn	2R	13220939	13222459	-1	Dsim\GD25778	Scf_2R	9775860	9777385	-1	Dsec\GM20297	scaffold_1	6631525	6632407	-1	Fsn	Dmau_2R	7439860	7440742	+
cbs	2R	13450586	13453393	1	Dsim\GD10966	Scf_2R	10000965	10003827	1	Dsec\GM21469	scaffold_1	6857459	6859840	1	cbs	Dmau_2R	7664735	7667118	+
und	2L	9763369	9765338	1	Dsim\GD23627	Scf_2L	9445804	9447788	1	Dsec\GM17682	scaffold_3	5210834	5212414	1
CCHa1-R	2R	17646848	17665068	-1	Dsim\GD25454	Scf_2R	14182282	14200107	-1	Dsec\GM19962	scaffold_1	11034513	11041296	-1	CCHa1-R	Dmau_2R	11723161	11729876	+
CG15533	3R	30428820	30431362	1	Dsim\GD21517	Scf_3R	25573704	25576240	1	Dsec\GM12878	scaffold_4	5079240	5081640	1	CG15533	Dmau_3R	25278147	25280550	+
His4:CG33881	2L	21504377	21504789	-1	Dsim\GD18968	Scf_3R	10757882	10758774	-1	Dsec\GM19606	scaffold_12634	407	700	1
Taf12	3R	11678386	11679690	-1	Dsim\GD20646	Scf_3R	13594528	13595828	1	Dsec\GM26083	scaffold_0	14460438	14461093	1	Taf12	Dmau_3R	13411510	13412165	+
CG11284	X	8681252	8688760	1	Dsim\GD16911	Scf_X	8132469	8139211	1	Dsec\GM21755	scaffold_35	426261	427167	1	CG11284	Dmau_X	7978240	7979158	+
Tsp42Ek	2R	7042656	7044710	1	Dsim\GD10451	Scf_2R	3779716	3781649	1	Dsec\GM20923	scaffold_1	598527	599918	1	Tsp42Ek	Dmau_2R	1521525	1522971	+
Alr	X	19748314	19750167	1	Dsim\GD17467	Scf_X	18520127	18521977	1	Dsec\GM22993	scaffold_8	1917966	1918901	1	Alr	Dmau_X	18436259	18437194	+
CG12320	3R	18251069	18252734	-1	Dsim\GD20191	Scf_3R	7200697	7202046	1	Dsec\GM15314	scaffold_12	72041	73180	1	CG12320	Dmau_3R	7052643	7053782	+
CG2278	X	8165833	8170266	-1	Dsim\GD24573	Scf_X	7621448	7625799	-1	Dsec\GM11200	scaffold_44	148124	150199	-1	CG2278	Dmau_X	7474303	7476422	+
CG7333	3R	19600635	19602629	1	Dsim\GD19297	Scf_3R	5837922	5840568	-1	Dsec\GM26848	scaffold_25	348615	350534	-1	CG7333	Dmau_3R	5728020	5729941	+
CG33552	2L	16682503	16683290	1	Dsim\GD27521	Scf_2L	16210000	16210847	1	Dsec\GM17193	scaffold_7	329672	330142	1	CG33552	Dmau_2L	15983302	15983772	+
CG7702	3R	18669390	18674679	1	Dsim\GD19242	Scf_3R	6756849	6762191	-1	Dsec\GM17881	scaffold_5	5400703	5403731	-1	CG7702	Dmau_3R	6636358	6637962	+
ear	3R	15320756	15325279	1
CG18538	2R	18297070	18297751	1	Dsim\GD11359	Scf_2R	14821815	14822543	1	Dsec\GM21862	scaffold_1	11674258	11674939	1
CG18281	3L	20499836	20501500	1	Dsim\GD14894	Scf_3L	19953419	19955240	1	Dsec\GM22302	scaffold_11	387667	389181	1	CG18281	Dmau_3L	19580917	19582086	+
Tdc2	2R	6684745	6689974	-1	Dsim\GD10312	Scf_2R	3434447	3440903	-1	Dsec\GM20861	scaffold_1	236714	240161	-1	Tdc2	Dmau_2R	1181500	1184915	+
CG10365	3R	23723331	23731499	1	Dsim\GD21033	Scf_3R	19099788	19107977	1	Dsec\GM26525	scaffold_0	19912147	19915340	1	CG10365	Dmau_3R	18835795	18838199	+
scra	2R	7590119	7595242	1	Dsim\GD10494	Scf_2R	4324876	4330857	1	Dsec\GM20966	scaffold_1	1141001	1145553	1	scra	Dmau_2R	2039248	2043805	+
His4:CG33873	2L	21524399	21524926	-1	Dsim\GD18968	Scf_3R	10757882	10758774	-1	Dsec\GM19606	scaffold_12634	407	700	1
CG33095	3R	25097672	25102146	1	Dsim\GD21174	Scf_3R	20433728	20438206	1						CG33095	Dmau_3R	20168676	20170299	+
CG34351	2L	4694721	4722465	1	Dsim\GD23297	Scf_2L	4511384	4542819	1	Dsec\GM18488	scaffold_5	2796049	2796878	1	CG34351	Dmau_2L	4496694	4511322	+
CG32413	3L	5902887	5904052	-1	Dsim\GD13169	Scf_3L	5809173	5810363	-1	Dsec\GM13887	scaffold_2	5831964	5832998	-1	CG32413	Dmau_3L	5638453	5639565	+
CG31937	2L	1729887	1731070	1	Dsim\GD23108	Scf_2L	1656368	1657647	1	Dsec\GM16831	scaffold_14	1664160	1665125	1	CG31937	Dmau_2L	1646282	1647247	+
CG43902	X	10158434	10195337	1	Dsim\GD24696	Scf_X	9558740	9565361	1	Dsec\GM11412	scaffold_15	791078	797452	1	CG43902	Dmau_X	9402349	9408677	+
mRpL41	2R	15217024	15217617	-1	Dsim\GD25631	Scf_2R	11775548	11776174	-1	Dsec\GM20152	scaffold_1	8598449	8598949	-1	mRpL41	Dmau_2R	9349130	9349630	+
CG30025	2R	11353564	11354373	-1	Dsim\GD29555	Scf_2R	7947366	7948292	-1	Dsec\GM20441	scaffold_1	4795733	4796503	-1
Vm26Ab	2L	5957004	5957639	1	Dsim\GD23372	Scf_2L	5752068	5752741	1	Dsec\GM18584	scaffold_5	4027755	4028261	1	Vm26Ab	Dmau_2L	5709405	5709872	+
CG13901	3L	836667	837821	-1	Dsim\GD13506	Scf_3L	800674	801483	-1	Dsec\GM14249	scaffold_2	864517	865185	-1	CG13901	Dmau_3L	784971	785639	+
Rcp	X	16884581	16886612	1	Dsim\GD17317	Scf_X	15867810	15869088	1	Dsec\GM13474	scaffold_17	606018	606923	1	Rcp	Dmau_X	15664151	15664971	+
CG5043	2L	17433862	17435800	1	Dsim\GD24109	Scf_2L	16953363	16955285	1	Dsec\GM17238	scaffold_7	1075499	1077182	1	CG5043	Dmau_2L	16707284	16708960	+
CG14077	3L	18908260	18914150	-1	Dsim\CoVIa	Scf_3L	18423838	18427440	-1	Dsec\GM14911	scaffold_19	871856	872793	-1	CG14077	Dmau_3L	18118678	18119700	+
Acer	2L	8521933	8525740	1	Dsim\GD23554	Scf_2L	8239395	8242438	1	Dsec\GM17055	scaffold_3	4009065	4011085	1	Acer	Dmau_2L	8190904	8193381	+
CG13287	3L	5882304	5884090	1	Dsim\GD13907	Scf_3L	5788514	5790403	1	Dsec\GM14727	scaffold_2	5811361	5812758	1	CG13287	Dmau_3L	5618021	5619445	+
twin	3R	24196893	24221965	-1	Dsim\GD18310	Scf_3R	19560683	19579473	-1						twin	Dmau_3R	19286429	19303152	+
smp-30	3R	14745901	14751246	-1	Dsim\GD20401	Scf_3R	10633007	10638260	1	Dsec\GM25827	scaffold_0	11360893	11361860	1	smp-30	Dmau_3R	10465862	10466834	+
CG31219	3R	19651018	19652430	1	Dsim\GD19306	Scf_3R	5788217	5789637	-1						CG31219	Dmau_3R	5678451	5679802	+
Est-P	3L	12190733	12192528	1	Dsim\Est-6	Scf_3L	11880703	11882571	1	Dsec\Est-6	scaffold_0	4366819	4368497	1	Est-P	Dmau_3L	11650080	11651769	+
CG8129	3R	9365398	9367763	1	Dsim\GD18609	Scf_3R	15832493	15835033	-1	Dsec\GM23798	scaffold_0	16702029	16704183	-1	CG8129	Dmau_3R	15643364	15645539	+
CG8878	2R	12146024	12151057	-1
Prpk	3L	5138652	5139395	-1	Dsim\GD13212	Scf_3L	5062660	5063437	-1	Dsec\GM13931	scaffold_2	5083875	5084549	-1	Prpk	Dmau_3L	4897421	4898095	+
CG7967	3L	1651432	1652900	-1
Nup44A	2R	7988462	7991283	1	Dsim\GD10530	Scf_2R	4700736	4702160	1	Dsec\GM20999	scaffold_1	1514698	1515957	1	Nup44A	Dmau_2R	2413661	2414920	+
Adk2	2R	24024207	24025877	1	Dsim\GD11825	Scf_2R	20367705	20369357	1	Dsec\GM19270	scaffold_13542	14	761	1
CG31823	2L	15898879	15900524	-1	Dsim\GD21932	Scf_2L	15437490	15439140	-1	Dsec\GM17924	scaffold_5	4631827	4633358	-1	CG31823	Dmau_2L	15221460	15222972	+
wtrw	3R	7891331	7901147	1	Dsim\GD19956	Scf_3R	3604952	3614898	1	Dsec\GM10982	scaffold_6	3790042	3796230	1	wtrw	Dmau_3R	3511570	3517862	+
Plod	3L	11198166	11206016	-1	Dsim\GD12814	Scf_3L	10931963	10939747	-1	Dsec\GM24765	scaffold_0	3413875	3421209	-1	Plod	Dmau_3L	10710158	10717469	+
CG34191	2R	16951837	16952581	1
gish	3R	16272452	16304768	1	Dsim\GD19086	Scf_3R	9122990	9152394	-1	Dsec\GM15143	scaffold_12	2019707	2032519	-1	gish	Dmau_3R	8959724	8987184	+
SmF	2R	12183844	12184310	-1	Dsim\GD15243	Scf_2R	8776208	8776662	-1	Dsec\GM20378	scaffold_1	5616041	5616307	-1	SmF	Dmau_2R	6451998	6452264	+
RpI135	2L	404285	407969	1	Dsim\GD23021	Scf_2L	376938	381423	1	Dsec\GM16738	scaffold_14	388212	391720	1	RpI135	Dmau_2L	374962	378470	+
CG43373	3L	16491838	16543370	-1	Dsim\GD12464	Scf_3L	16105201	16145023	-1	Dsec\GM24393	scaffold_0	8586014	8622658	-1	CG43373	Dmau_3L	15841189	15864380	+
CG32006	4	150764	153538	1	Dsim\GD27269	Scf_4	118434	121687	1	Dsec\GM23241	scaffold_52	113978	115493	1	CG32006	Dmau_4	108561	110075	+
CG7970	3L	1652750	1654238	1	Dsim\GD13636	Scf_3L	1562622	1563801	1	Dsec\GM14435	scaffold_2	1679343	1680039	1	CG7970	Dmau_3L	1539707	1540403	+
CG9483	2L	8866767	8867686	1	Dsim\GD23571	Scf_2L	8572618	8573533	1	Dsec\GM17217	scaffold_3	4340986	4341714	1	CG9483	Dmau_2L	8520564	8521292	+
nst	3L	12527215	12530171	-1	Dsim\GD12708	Scf_3L	12222027	12224879	-1	Dsec\GM24643	scaffold_0	4705697	4707226	-1	nst	Dmau_3L	11987894	11990355	+
hipk	3L	543060	581099	1
CG17764	X	5306261	5307417	-1	Dsim\GD27625	Scf_X	4848315	4849241	-1	Dsec\GM12653	scaffold_4	1552027	1552791	1	CG17764	Dmau_X	4764507	4765194	+
CG10904	2R	23968941	23970073	-1	Dsim\GD24988	Scf_2R	20312218	20313448	-1	Dsec\GM15485	scaffold_9	3140570	3141430	-1	CG10904	Dmau_2R	17820076	17820936	+
dpr13	2R	17975122	18007902	-1	Dsim\GD25426	Scf_2R	14507738	14540636	-1	Dsec\GM19938	scaffold_1	11358417	11371864	-1	dpr13	Dmau_2R	12049184	12079825	+
CG11367	3L	22728111	22733446	1	Dsim\GD27242	Scf_3L	22123731	22129245	1						CG11367	Dmau_3L	21734738	21739415	+
CG15254	2L	15613905	15614828	-1
CG3812	X	12765266	12772851	1	Dsim\GD17087	Scf_X	12006361	12013143	1	Dsec\GM11583	scaffold_21	416791	420101	1	CG3812	Dmau_X	11813216	11816525	+
Dfd	3R	6791836	6802428	1	Dsim\GD19895	Scf_3R	2511784	2522496	1	Dsec\GM10914	scaffold_6	2709022	2718723	1	Dfd	Dmau_3R	2447408	2457120	+
boss	3R	25961994	25966948	1	Dsim\boss	Scf_3R	21284548	21289700	1						boss	Dmau_3R	21007392	21010639	+
Use1	3L	9135709	9137181	-1	Dsim\GD12941	Scf_3L	8901668	8903182	-1	Dsec\GM24890	scaffold_0	1387958	1389229	-1	Use1	Dmau_3L	8704335	8705621	+
CG10909	3R	12910120	12911292	-1	Dsim\GD20534	Scf_3R	12421427	12422733	1	Dsec\GM25973	scaffold_0	13252774	13253805	1	CG10909	Dmau_3R	12247082	12248130	+
CG10317	3R	16368855	16370533	-1	Dsim\GD20293	Scf_3R	9054138	9055326	1	Dsec\GM15437	scaffold_12	1951384	1952194	1	CG10317	Dmau_3R	8891697	8892486	+
CG7025	2L	7691109	7692683	-1	Dsim\GD22481	Scf_2L	7442880	7444467	-1	Dsec\GM13458	scaffold_3	3204958	3206472	-1	CG7025	Dmau_2L	7395256	7396770	+
CG12858	2R	14739359	14745335	-1
CG31221	3R	19412689	19460311	1	Dsim\GD19292	Scf_3R	5981111	6019565	-1	Dsec\GM26843	scaffold_25	493524	525448	-1	CG31221	Dmau_3R	5873133	5880672	+
Lcp2	2R	8433797	8434785	-1	Dsim\GD10171	Scf_2R	5132194	5133319	-1	Dsec\GM20690	scaffold_1	1958374	1958830	-1	Lcp2	Dmau_2R	2845488	2845932	+
CG8389	2R	16008339	16013815	1	Dsim\GD11150	Scf_2R	12561761	12567238	1	Dsec\GM21651	scaffold_1	9398417	9399959	1	CG8389	Dmau_2R	10128675	10130217	+
CG14299	3R	18750436	18758873	-1
CG7519	3L	21493083	21493907	1	Dsim\GD14964	Scf_3L	20902173	20903122	1	Dsec\GM22373	scaffold_11	1406009	1406606	1	CG7519	Dmau_3L	20523216	20523763	+
CG10433	2R	21605676	21608125	-1	Dsim\GD25186	Scf_2R	18002892	18004526	-1	Dsec\GM15708	scaffold_9	819994	820480	-1	CG10433	Dmau_2R	15523269	15524015	+
sut2	2R	8087396	8089297	1
CG9590	3R	15786703	15788339	1	Dsim\GD19045	Scf_3R	9632229	9633886	-1	Dsec\GM24257	scaffold_0	10340394	10341289	-1	CG9590	Dmau_3R	9466352	9467793	+
Cpr47Ea	2R	11251751	11253398	-1	Dsim\GD27136	Scf_2R	7859377	7860958	-1	Dsec\GM20464	scaffold_1	4707980	4708799	-1	Cpr47Ea	Dmau_2R	5539437	5540193	+
Sce	3R	27680431	27682029	-1	Dsim\GD18065	Scf_3R	22931000	22932715	-1	Dsec\GM16329	scaffold_22	149524	150887	-1	Sce	Dmau_3R	22644970	22646339	+
Pomp	2L	20787656	20789098	1	Dsim\GD24281	Scf_2L	20200159	20201316	1	Dsec\GM23371	scaffold_18	698459	699191	1	Pomp	Dmau_2L	19820352	19821016	+
heix	2L	16296051	16299858	-1
Lar	2L	19586623	19732069	1	Dsim\GD24230	Scf_2L	19082392	19195263	1	Dsec\GM21991	scaffold_3265	80	2644	1	Lar	Dmau_2L	18881360	18911068	+
CG11099	2R	20236235	20239200	1	Dsim\GD11497	Scf_2R	16659008	16661385	1	Dsec\GM21998	scaffold_1	13690393	13692185	1	CG11099	Dmau_2R	14185708	14187470	+
HERC2	X	20394395	20412247	1	Dsim\GD17489	Scf_X	19011364	19029151	1	Dsec\GM23027	scaffold_8	2460572	2473484	1	HERC2	Dmau_X	18937089	18953455	+
CG34299	3R	30249583	30250661	1	Dsim\GD21510	Scf_3R	25419040	25420163	1						CG34299	Dmau_3R	25123974	25124966	+
CG18417	3L	7400070	7401671	1	Dsim\GD14015	Scf_3L	7256111	7257725	1	Dsec\GM14842	scaffold_2	7321926	7323003	1	CG18417	Dmau_3L	7066684	7068094	+
crc	2L	21310866	21319527	1	Dsim\GD24316	Scf_2L	20714139	20722637	1	Dsec\GM23408	scaffold_18	1240782	1248639	1	crc	Dmau_2L	20325686	20332842	+
CG3216	2R	20986833	20991171	-1	Dsim\GD25238	Scf_2R	17386615	17391086	-1	Dsec\GM15763	scaffold_9	205072	209425	-1	CG3216	Dmau_2R	14910021	14914334	+
CG34330	X	19068275	19068973	-1
GATAe	3R	16009105	16019133	1	Dsim\GD19066	Scf_3R	9405849	9415991	-1	Dsec\GM24276	scaffold_0	10114521	10120530	-1	GATAe	Dmau_3R	9241978	9248054	+
CG14894	3R	16441843	16443007	-1	Dsim\GD20288	Scf_3R	8981295	8982343	1	Dsec\GM15432	scaffold_12	1878508	1879370	1	CG14894	Dmau_3R	8819043	8819894	+
GluClalpha	3R	19730715	19775231	1	Dsim\GD19310	Scf_3R	5683499	5718245	-1	Dsec\GM26860	scaffold_25	192189	206962	-1	GluClalpha	Dmau_3R	5577237	5592123	+
Ranbp16	X	15927185	15933867	-1	Dsim\GD28981	Scf_X	14978359	14984972	-1	Dsec\GM22511	scaffold_37	399023	401480	-1	Ranbp16	Dmau_X	14787969	14792344	+
CG43867	X	808217	927975	-1	Dsim\GD16453	Scf_X	616051	702008	-1	Dsec\GM19019	scaffold_10	548467	561161	-1	CG43867	Dmau_X	606697	626966	+
Gyc76C	3L	19750943	19793569	-1	Dsim\GD12253	Scf_3L	19256301	19294466	-1	Dsec\GM16468	scaffold_29	411267	417574	-1	Gyc76C	Dmau_3L	18896841	18903080	+
Act79B	3L	21985210	21987190	1						Dsec\GM19279	scaffold_14325	9	572	1	Act79B	Dmau_3L	21013225	21014635	+
Reph	2L	3803545	3810671	1	Dsim\GD23257	Scf_2L	3655453	3661532	1	Dsec\GM18440	scaffold_5	1908783	1910322	1	Reph	Dmau_2L	3633138	3634678	+
Taf13	2L	20093088	20093849	-1	Dsim\GD11962	Scf_2L	19546039	19546808	-1	Dsec\GM16962	scaffold_7	3705807	3706277	-1	Taf13	Dmau_2L	19261193	19261734	+
CG32407	3L	5922055	5923567	1	Dsim\GD13913	Scf_3L	5828495	5829993	1	Dsec\GM14734	scaffold_2	5851585	5852442	1	CG32407	Dmau_3L	5658231	5659082	+
Liprin-gamma	2R	22333500	22373109	-1	Dsim\GD25133	Scf_2R	18713622	18750980	-1	Dsec\GM15644	scaffold_9	1532199	1542808	-1	Liprin-gamma	Dmau_2R	16232119	16243872	+
CG11852	3R	25237614	25238895	1	Dsim\GD21189	Scf_3R	20572462	20573789	1	Dsec\GM17820	scaffold_33	324033	325048	1	CG11852	Dmau_3R	20305464	20306481	+
Nop17l	2R	7800785	7806385	-1	Dsim\GD15300	Scf_2R	4530116	4535192	-1	Dsec\GM20755	scaffold_1	1345327	1348605	-1	Nop17l	Dmau_2R	2243805	2247104	+
CG34279	3R	17402362	17403288	-1	Dsim\GD20235	Scf_3R	8032676	8036195	1	Dsec\GM15366	scaffold_12	918262	919237	1	CG34279	Dmau_3R	7873739	7874215	+
w	X	2790599	2796466	-1	Dsim\GD28510	Scf_X	2486339	2492110	-1	Dsec\w	scaffold_10	2444744	2446195	-1	w	Dmau_X	2457089	2462507	+
CG17717	X	6589290	6590646	1	Dsim\GD16805	Scf_X	6077758	6079166	1	Dsec\GM12500	scaffold_4	316512	317591	-1	CG17717	Dmau_X	5956900	5957979	+
CG12682	X	4825974	4826833	1	Dsim\GD16707	Scf_X	4403443	4404299	1	Dsec\GM12368	scaffold_4	2012213	2014967	-1	CG12682	Dmau_X	4323132	4323811	+
Acp53C14a	2R	16747834	16748590	-1	Dsim\Acp53C14a	Scf_2R	13307179	13307744	-1	Dsec\GM20036	scaffold_1	10141084	10141501	-1	Acp53C14a	Dmau_2R	10852811	10853228	+
upSET	3L	14002127	14020148	1	Dsim\GD14471	Scf_3L	13672227	13683532	1	Dsec\GM25446	scaffold_0	6152338	6157475	1	upSET	Dmau_3L	13417248	13429463	+
Lip1	2L	10699408	10701544	-1	Dsim\GD22235	Scf_2L	10374980	10377592	-1	Dsec\GM11511	scaffold_3	6117235	6118984	-1	Lip1	Dmau_2L	10293584	10295376	+
CG43273	3R	24830301	24830973	1	Dsim\GD21134	Scf_3R	20171757	20172728	1	Dsec\GM17766	scaffold_33	32674	33087	-1	CG43273	Dmau_3R	19904902	19905315	+
Trap1	2R	6633647	6636262	-1
CG14764	2R	7942043	7955882	-1	Dsim\GD10208	Scf_2R	4652659	4666630	-1	Dsec\GM20742	scaffold_1	1467280	1478560	-1	CG14764	Dmau_2R	2366102	2377541	+
CG4557	X	6844341	6847847	1	Dsim\GD27999	Scf_X	6329959	6333738	1	Dsec\GM12540	scaffold_4	54289	55594	-1	CG4557	Dmau_X	6207360	6210424	+
CG13227	2R	11235252	11235755	1						Dsec\GM21261	scaffold_1	4691621	4691983	1	CG13227	Dmau_2R	5522915	5523277	+
CG33483	3R	30900718	30902161	-1	Dsim\GD16763	Scf_3R	26037223	26038127	-1	Dsec\GM12121	scaffold_4	5552072	5552785	-1	CG33483	Dmau_3R	25737443	25739224	+
GABA-B-R2	3R	21770333	21775840	-1
CG10445	3R	7916599	7920299	-1	Dsim\GD19449	Scf_3R	3630526	3634247	-1	Dsec\GM10445	scaffold_6	3812673	3815767	-1	CG10445	Dmau_3R	3534008	3537098	+
colt	2L	2768590	2770069	-1	Dsim\GD22804	Scf_2L	2655925	2657368	-1	Dsec\GM18199	scaffold_5	934602	935522	-1	colt	Dmau_2L	2632235	2633155	+
CG42272	3L	5803033	5805749	1	Dsim\GD13903	Scf_3L	5707608	5711753	1	Dsec\GM14722	scaffold_2	5732896	5735529	1	CG42272	Dmau_3L	5538663	5541323	+
yip2	2L	9915253	9917220	1	Dsim\GD23636	Scf_2L	9613456	9615432	1	Dsec\GM17755	scaffold_3	5362898	5364664	1	yip2	Dmau_2L	9540525	9542028	+
Lrrk	3R	20635480	20644279	1	Dsim\GD19364	Scf_3R	4836521	4845513	-1	Dsec\GM23127	scaffold_27	266587	274545	-1	Lrrk	Dmau_3R	4729008	4737331	+
CG8461	3R	14512639	14513637	-1	Dsim\GD20416	Scf_3R	10870457	10871450	1	Dsec\GM25849	scaffold_0	11702664	11703509	1	CG8461	Dmau_3R	10698500	10699346	+
pins	3R	27582840	27586376	1	Dsim\GD21341	Scf_3R	22833258	22835862	1	Dsec\GM16343	scaffold_22	42387	44650	1	pins	Dmau_3R	22547921	22550174	+
CG32269	3L	3206949	3208985	-1	Dsim\GD13341	Scf_3L	3103942	3106193	-1	Dsec\GM14066	scaffold_2	3200260	3201258	-1	CG32269	Dmau_3L	3038093	3039091	+
e(y)1	X	17842161	17843348	1	Dsim\GD17368	Scf_X	16835367	16836548	1	Dsec\GM22857	scaffold_8	46258	47151	1	e(y)1	Dmau_X	16601585	16602471	+
CG15695	3R	20842140	20844981	1	Dsim\GD19378	Scf_3R	4635014	4637876	-1	Dsec\GM23139	scaffold_27	63561	65637	-1	CG15695	Dmau_3R	4526932	4529234	+
CG18467	2R	17440297	17442483	1	Dsim\GD11267	Scf_2R	13975016	13982673	1	Dsec\GM23079	scaffold_2401	468	1236	1	CG18467	Dmau_2R	11526008	11526776	+
CG33199	2R	8947681	8951086	-1	Dsim\GD10122	Scf_2R	5644940	5648023	-1						CG33199	Dmau_2R	3352557	3354525	+
CG9701	3L	16733546	16739364	1	Dsim\GD14660	Scf_3L	16316602	16322556	1	Dsec\GM25655	scaffold_0	8798470	8804015	1	CG9701	Dmau_3L	16047226	16052824	+
ND-B14.5B	2L	3144953	3145848	-1	Dsim\GD22775	Scf_2L	3019294	3020011	-1	Dsec\GM18165	scaffold_5	1296763	1297247	-1	ND-B14.5B	Dmau_2L	2995086	2995570	+
CG13071	3L	16262740	16263247	1	Dsim\GD14611	Scf_3L	15870347	15870766	1	Dsec\GM25603	scaffold_0	8350085	8350363	1	CG13071	Dmau_3L	15605540	15605740	+
SF2	3R	16338943	16341988	-1	Dsim\GD28158	Scf_3R	9082689	9084579	1	Dsec\GM15444	scaffold_12	1979467	1980652	1
CG14731	3R	11931262	11933640	1	Dsim\GD18788	Scf_3R	13346007	13348358	-1	Dsec\GM18193	scaffold_5	982756	984660	-1	CG14731	Dmau_3R	13163051	13165297	+
Hexo2	X	8709652	8712478	1	Dsim\GD16914	Scf_X	8157254	8160076	1	Dsec\GM21777	scaffold_35	445232	447792	1	Hexo2	Dmau_X	7997316	7999877	+
CG30393	2R	21266364	21267579	-1	Dsim\GD25214	Scf_2R	17661725	17663199	-1	Dsec\GM15736	scaffold_9	483968	485050	-1	CG30393	Dmau_2R	15185236	15186300	+
CG18265	3L	17439401	17457461	1	Dsim\GD17645	Scf_3L	17028794	17046875	1	Dsec\GM25699	scaffold_0	9495844	9499161	1	CG18265	Dmau_3L	16741045	16745013	+
CG14921	2L	11120642	11121714	-1	Dsim\GD22192	Scf_2L	10778700	10779782	-1	Dsec\GM11145	scaffold_3	6522146	6522972	-1	CG14921	Dmau_2L	10696971	10697796	+
CG7804	3L	15472197	15474110	-1	Dsim\GD12565	Scf_3L	15097665	15099707	-1	Dsec\GM24493	scaffold_0	7574690	7575721	-1	CG7804	Dmau_3L	14839529	14840557	+
CheA75a	3L	18252088	18252846	1	Dsim\GD28624	Scf_3L	17798605	17799415	1	Dsec\GM14971	scaffold_19	239202	239815	1	CheA75a	Dmau_3L	17495718	17496331	+
CG42537	3R	6377797	6378233	1	Dsim\GD23572	Scf_2L	8597210	8597944	1	Dsec\GM17228	scaffold_3	4365541	4365886	1	CG42537	Dmau_3R	2045973	2046308	+
salm	2L	11434311	11445614	-1	Dsim\GD22176	Scf_2L	11088430	11098012	-1	Dsec\GM11080	scaffold_3	6830968	6833360	-1	salm	Dmau_2L	11005429	11014606	+
CG13796	2L	7727157	7732670	-1	Dsim\GD22474	Scf_2L	7479202	7484684	-1	Dsec\GM13394	scaffold_3	3241136	3244180	-1	CG13796	Dmau_2L	7432005	7435045	+
Oaz	2R	14435899	14465881	1	Dsim\GD11056	Scf_2R	11032501	11062550	1	Dsec\GM21549	scaffold_1	7867705	7874224	1
Madm	3R	5742510	5747138	1
CG3632	X	16296671	16303308	1	Dsim\GD17273	Scf_X	15298838	15305297	1	Dsec\GM13419	scaffold_17	17583	23850	1	CG3632	Dmau_X	15097470	15103724	+
m-cup	3R	17144475	17149412	-1	Dsim\GD20246	Scf_3R	8284769	8288964	1	Dsec\GM15380	scaffold_12	1180987	1184297	1	m-cup	Dmau_3R	8124898	8128245	+
RacGAP84C	3R	7285962	7287629	1	Dsim\GD19928	Scf_3R	3035712	3037582	1	Dsec\GM10949	scaffold_6	3204683	3206047	1	RacGAP84C	Dmau_3R	2949908	2951317	+
corto	3R	5077779	5087072	-1						Dsec\GM10662	scaffold_6	1035190	1036420	-1	corto	Dmau_3R	801370	802922	+
Iris	2L	1132332	1134098	-1	Dsim\GD22926	Scf_2L	1079547	1081329	-1	Dsec\GM16626	scaffold_14	1085538	1087121	-1	Iris	Dmau_2L	1073359	1074490	+
pyr	2R	11712263	11726345	1						Dsec\GM21303	scaffold_1	5152627	5164608	1	pyr	Dmau_2R	5992351	5997613	+
CG13801	3L	2360557	2362686	1	Dsim\GD29373	Scf_3L	2257526	2259743	1	Dsec\GM14485	scaffold_2	2385353	2387425	1	CG13801	Dmau_3L	2234024	2236096	+
CG8112	3R	8712933	8715263	1	Dsim\GD18564	Scf_3R	16451196	16453749	-1	Dsec\GM23753	scaffold_0	17315511	17317557	-1	CG8112	Dmau_3R	16257512	16259561	+
CG33217	3L	23126025	23132209	1	Dsim\GD15066	Scf_3L	22463665	22468388	1
CG5789	3R	24536204	24543914	-1	Dsim\GD18286	Scf_3R	19892788	19900462	-1	Dsec\GM23478	scaffold_0	20698410	20703030	-1	CG5789	Dmau_3R	19616703	19621333	+
CG6738	3R	23099533	23100983	1	Dsim\GD21000	Scf_3R	18463521	18464992	1	Dsec\GM26486	scaffold_0	19284307	19285692	1	CG6738	Dmau_3R	18212238	18213597	+
CapaR	3L	21558974	21562181	-1	Dsim\GD12106	Scf_3L	20967709	20970968	-1	Dsec\GM22127	scaffold_11	1472444	1475215	-1	CapaR	Dmau_3L	20589645	20592481	+
Lsp1gamma	3L	66430	68995	1	Dsim\Lsp1gamma	Scf_3L	45032	47534	1	Dsec\GM14308	scaffold_2	100044	102427	1	Lsp1gamma	Dmau_3L	36160	38542	+
c(2)M	2L	16303264	16305940	1
CG14342	2L	1204215	1205250	1	Dsim\GD23088	Scf_2L	1151380	1152435	1	Dsec\GM16807	scaffold_14	1162834	1163639	1	CG14342	Dmau_2L	1144827	1145499	+
alpha-Est10	3R	7486583	7493845	-1	Dsim\GD19481	Scf_3R	3230597	3237975	-1	Dsec\GM10481	scaffold_6	3402200	3413404	-1	alpha-Est10	Dmau_3R	3143805	3150839	+
fliI	X	21339741	21345088	1	Dsim\GD24888	Scf_X	19932146	19937319	1	Dsec\GM23076	scaffold_8	3518116	3522478	1	fliI	Dmau_X	19819838	19824110	+
CG17386	2R	14420324	14424764	1
flr	3L	13412843	13416453	1	Dsim\GD14448	Scf_3L	13107984	13111619	1	Dsec\GM25418	scaffold_0	5580740	5583916	1	flr	Dmau_3L	12857938	12861110	+
mei-218	X	17135985	17142996	-1	Dsim\mei-218	Scf_X	16134468	16139796	-1	Dsec\GM13338	scaffold_17	872885	876971	-1	mei-218	Dmau_X	15909271	15911279	+
MFS3	2L	1143201	1147395	1	Dsim\GD23071	Scf_2L	1090343	1094494	1	Dsec\GM16795	scaffold_14	1103550	1107135	1	MFS3	Dmau_2L	1084196	1087904	+
CG12173	3R	5255444	5256681	-1	Dsim\GD19634	Scf_3R	987094	988332	-1	Dsec\GM10653	scaffold_6	1204322	1205439	-1	CG12173	Dmau_3R	970768	971930	+
His3.3B	X	9152523	9156669	-1	Dsim\GD27984	Scf_X	8582172	8584991	-1	Dsec\GM18523	scaffold_5	3142340	3142840	1	His3.3B	Dmau_X	8418003	8418553	+
Fie	3L	3892574	3894833	1
CG13516	2R	22669145	22670622	1	Dsim\GD11692	Scf_2R	19040645	19042436	1	Dsec\GM15939	scaffold_9	1859432	1860089	1	CG13516	Dmau_2R	16555340	16556003	+
Tsp66A	3L	7465509	7468808	1	Dsim\GD14019	Scf_3L	7325238	7326758	1	Dsec\GM14847	scaffold_2	7390681	7392148	1	Tsp66A	Dmau_3L	7135102	7136038	+
Tektin-C	3L	5794405	5796543	-1	Dsim\GD17596	Scf_3L	5700452	5702448	-1	Dsec\GM13895	scaffold_2	5724541	5726277	-1	Tektin-C	Dmau_3L	5530271	5532007	+
CG4520	3R	15744654	15746411	1	Dsim\GD19040	Scf_3R	9674659	9676197	-1	Dsec\GM24251	scaffold_0	10383298	10384466	-1	CG4520	Dmau_3R	9508420	9509573	+
Eip74EF	3L	17558672	17619325	-1	Dsim\GD12395	Scf_3L	17143757	17186275	-1	Dsec\GM24322	scaffold_0	9601677	9615687	-1	Eip74EF	Dmau_3L	16846324	16859873	+
CG1789	X	8720520	8721503	1	Dsim\GD16916	Scf_X	8168254	8169216	1	Dsec\GM21797	scaffold_35	456545	457389	1	CG1789	Dmau_X	8008195	8009009	+
ZnT49B	2R	12652805	12655743	1	Dsim\GD10910	Scf_2R	9249207	9252158	1	Dsec\GM21415	scaffold_1	6087084	6089383	1	ZnT49B	Dmau_2R	6917733	6920045	+
CG33514	3L	4365434	4366671	1	Dsim\GD13840	Scf_3L	4317637	4318951	1	Dsec\GM14655	scaffold_2	4355413	4356412	1	CG33514	Dmau_3L	4176759	4177758	+
CG10570	2L	18808694	18811252	-1
CG1550	2R	7810068	7812028	-1	Dsim\GD10218	Scf_2R	4538848	4540832	-1	Dsec\GM20754	scaffold_1	1353892	1355772	-1	CG1550	Dmau_2R	2252414	2254294	+
RpS15Aa	X	13335637	13337705	-1	Dsim\GD15889	Scf_X	12563484	12565372	-1	Dsec\GM11496	scaffold_21	985250	985642	-1
Cpr62Bc	3L	1840281	1842084	-1	Dsim\GD13434	Scf_3L	1749705	1751509	-1	Dsec\GM14163	scaffold_2	1866560	1867777	-1	Cpr62Bc	Dmau_3L	1726958	1728164	+
lectin-46Cb	2R	9815510	9816600	1	Dsim\GD10684	Scf_2R	6480776	6481999	1	Dsec\GM21152	scaffold_1	3311978	3313007	1	lectin-46Cb	Dmau_2R	4179055	4180100	+
fs(1)h	X	8037808	8061436	-1	Dsim\GD16134	Scf_X	7494798	7516593	-1	Dsec\GM11218	scaffold_44	21372	33784	-1	fs(1)h	Dmau_X	7350080	7360972	+
Dop2R	X	20004680	20062706	-1	Dsim\GD27412	Scf_X	18727000	18758085	-1	Dsec\GM22697	scaffold_8	2131640	2153281	-1	Dop2R	Dmau_X	18632184	18651583	+
CG17140	2L	10843014	10845664	-1	Dsim\GD22220	Scf_2L	10520464	10521699	-1	Dsec\GM11380	scaffold_3	6262572	6263716	-1	CG17140	Dmau_2L	10436683	10437896	+
CG10321	2R	21634679	21638399	1	Dsim\GD11609	Scf_2R	18031775	18035346	1	Dsec\GM15847	scaffold_9	848975	851479	1	CG10321	Dmau_2R	15552777	15555341	+
CG7739	3L	15560726	15563065	-1	Dsim\GD12554	Scf_3L	15185792	15188107	-1	Dsec\GM24481	scaffold_0	7667761	7669613	-1	CG7739	Dmau_3L	14924789	14926641	+
CG5532	2R	23752754	23753515	1	Dsim\GD11795	Scf_2R	20104327	20104987	1	Dsec\GM16045	scaffold_9	2920269	2920665	1	CG5532	Dmau_2R	17612463	17612859	+
CG33284	3L	21123753	21124884	1	Dsim\GD14934	Scf_3L	20568803	20569978	1	Dsec\GM22341	scaffold_11	1075157	1075576	1	CG33284	Dmau_3L	20188855	20189206	+
CG5706	3R	24250460	24252679	-1
CG7091	3R	12978000	12980535	1	Dsim\GD18866	Scf_3R	12358675	12361197	-1	Dsec\GM24069	scaffold_0	13190088	13192311	-1	CG7091	Dmau_3R	12184230	12186399	+
Psc	2R	12965997	12980994	-1	Dsim\GD25796	Scf_2R	9532568	9547473	-1	Dsec\GM20319	scaffold_1	6369775	6373586	-1	Psc	Dmau_2R	7197447	7209152	+
l(2)dtl	2R	23702477	23705403	1	Dsim\GD11788	Scf_2R	20054007	20056932	1	Dsec\GM16040	scaffold_9	2869255	2871837	1	l(2)dtl	Dmau_2R	17563508	17566091	+
CG43780	3L	7333544	7335226	-1	Dsim\GD13072	Scf_3L	7193242	7194947	-1	Dsec\GM13774	scaffold_2	7252205	7252765	-1	CG43780	Dmau_3L	7004759	7005311	+
Aats-trp	3R	9265027	9266904	-1
CG7362	3R	14751748	14754460	-1	Dsim\GD27201	Scf_3R	10629266	10632578	1						CG7362	Dmau_3R	10458709	10461100	+
CG11696	X	11573731	11576152	1	Dsim\GD27568	Scf_X	10873205	10875618	1	Dsec\GM13094	scaffold_36	184207	186023	1	CG11696	Dmau_X	10695956	10698136	+
CG10344	2R	22425733	22426977	-1	Dsim\GD25128	Scf_2R	18803773	18805001	-1	Dsec\GM15639	scaffold_9	1622208	1623001	-1	CG10344	Dmau_2R	16321567	16322458	+
p38a	3R	24150416	24152321	-1	Dsim\GD18318	Scf_3R	19513356	19514932	-1	Dsec\GM23508	scaffold_0	20314230	20315330	-1	p38a	Dmau_3R	19238939	19240039	+
CG3829	2R	24986044	24990489	1	Dsim\GD11915	Scf_2R	21291553	21296427	1	Dsec\GM11919	scaffold_23	732635	734716	1	CG3829	Dmau_2R	18798710	18800792	+
slow	3L	4384442	4403181	1	Dsim\GD13841	Scf_3L	4336709	4355106	1	Dsec\GM14656	scaffold_2	4380250	4392339	1	slow	Dmau_3L	4201701	4214053	+
CG10166	2L	19525434	19526368	-1	Dsim\GD21748	Scf_2L	19020388	19021308	-1	Dsec\GM17002	scaffold_7	3140166	3141019	-1	CG10166	Dmau_2L	18738185	18739038	+
Ca-beta	2L	11156118	11203544	-1	Dsim\GD22184	Scf_2L	10817228	10829129	-1	Dsec\GM11112	scaffold_3	6562504	6571797	-1	Ca-beta	Dmau_2L	10735506	10743135	+
cana	2L	11269780	11277846	1	Dsim\GD23772	Scf_2L	10923805	10931793	1	Dsec\GM18973	scaffold_3	6666626	6674334	1	cana	Dmau_2L	10841353	10848879	+
CG31275	3R	16750741	16751334	-1	Dsim\GD20269	Scf_3R	8673179	8673646	1	Dsec\GM15406	scaffold_12	1570761	1571066	1	CG31275	Dmau_3R	8512357	8512662	+
CG14292	3R	18904933	18905655	-1	Dsim\GD20146	Scf_3R	6525792	6526544	1	Dsec\GM18675	scaffold_5	5165243	5165820	1	CG14292	Dmau_3R	6408019	6408596	+
CG15141	2L	17410641	17413499	1	Dsim\GD24108	Scf_2L	16916350	16919390	1	Dsec\GM17237	scaffold_7	1052426	1054817	1	CG15141	Dmau_2L	16684231	16686622	+
CG9114	X	15330784	15333154	-1	Dsim\GD15810	Scf_X	14376486	14378975	-1	Dsec\GM10978	scaffold_56	112620	114544	-1	CG9114	Dmau_X	14207747	14209665	+
Pli	3R	23860162	23890052	-1	Dsim\GD18346	Scf_3R	19221765	19252017	-1	Dsec\GM23534	scaffold_0	20028125	20055481	-1	Pli	Dmau_3R	18950955	18955227	+
CG5009	2R	17760940	17764541	1
2019-09-02	3R	20586129	20588356	-1
CG7079	3R	21047462	21048829	-1	Dsim\GD20016	Scf_3R	4430431	4431445	1	Dsec\GM15111	scaffold_38	251421	252317	1	CG7079	Dmau_3R	4323683	4324579	+
CG11377	2L	102380	104142	1	Dsim\GD23000	Scf_2L	88486	90382	1	Dsec\GM16714	scaffold_14	101774	103077	1	CG11377	Dmau_2L	85848	87151	+
CG17556	3R	16994542	16996071	-1	Dsim\GD20260	Scf_3R	8439033	8440576	1	Dsec\GM22065	scaffold_1721	328	690	1
CG15891	X	6294517	6295345	-1	Dsim\GD16197	Scf_X	5804508	5805201	-1	Dsec\GM12579	scaffold_4	579947	580396	1	CG15891	Dmau_X	5698987	5699436	+
CCAP-R	3R	25923499	25956270	-1	Dsim\GD18159	Scf_3R	21246195	21279087	-1	Dsec\GM10207	scaffold_13	533801	551279	-1	CCAP-R	Dmau_3R	20968121	20985673	+
Listericin	2R	11241745	11242194	-1						Dsec\GM20465	scaffold_1	4698172	4698483	-1	Listericin	Dmau_2R	5529345	5529647	+
CG9003	2R	11641477	11651616	-1	Dsim\GD25892	Scf_2R	8234101	8240623	-1	Dsec\GM20416	scaffold_1	5081017	5083916	-1	CG9003	Dmau_2R	5914372	5917099	+
CG1707	2R	7393546	7395932	-1
CG4587	2L	15644183	15718272	-1
mus201	2L	8438169	8442342	1	Dsim\GD23543	Scf_2L	8165006	8169169	1	Dsec\GM16947	scaffold_3	3934673	3938581	1	mus201	Dmau_2L	8116267	8120176	+
Hsp67Bc	3L	9371511	9372497	-1	Dsim\GD12934	Scf_3L	9139513	9140604	-1	Dsec\GM24882	scaffold_0	1614247	1614846	-1	Hsp67Bc	Dmau_3L	8930894	8931493	+
Rgk1	2R	19311148	19356525	-1	Dsim\GD25328	Scf_2R	15807110	15840867	-1	Dsec\GM19837	scaffold_1	12727022	12732207	-1	Rgk1	Dmau_2R	13333050	13366470	+
Tsp26A	2L	6000228	6003738	1	Dsim\GD23377	Scf_2L	5795625	5797997	1	Dsec\GM18589	scaffold_5	4071070	4072407	1	Tsp26A	Dmau_2L	5752668	5754133	+
CG6950	3R	11820381	11822493	-1	Dsim\GD20629	Scf_3R	13452011	13454115	1	Dsec\GM26066	scaffold_0	14317042	14318447	1	CG6950	Dmau_3R	13269105	13270510	+
Jon99Fi	3R	30488963	30489895	1	Dsim\GD11483	Scf_3R	25632044	25632939	-1	Dsec\GM12839	scaffold_4	4595821	4596620	1	Jon99Fi	Dmau_3R	25335314	25336153	+
CG9757	3R	13611583	13612433	-1	Dsim\GD20488	Scf_3R	11741323	11741963	1	Dsec\GM25923	scaffold_0	12569086	12569472	1	CG9757	Dmau_3R	11569431	11569835	+
CG43088	X	14702358	14703654	1	Dsim\GD27927	Scf_X	13780383	13781760	1						CG43088	Dmau_X	13618007	13619205	+
CG5986	3R	24047790	24049168	1	Dsim\GD21057	Scf_3R	19412987	19414092	1	Dsec\GM26552	scaffold_0	20215593	20216350	1	CG5986	Dmau_3R	19139081	19139837	+
CG4119	X	5666052	5670652	1
mdlc	3R	20057748	20059291	1	Dsim\GD19337	Scf_3R	5399529	5400935	-1	Dsec\GM17684	scaffold_58	178633	179828	-1	mdlc	Dmau_3R	5290381	5291572	+
CG9759	3R	13607078	13609246	-1	Dsim\GD20489	Scf_3R	11743821	11745058	1	Dsec\GM25924	scaffold_0	12572253	12572591	1	CG9759	Dmau_3R	11572644	11572982	+
rgn	3L	21382501	21424416	1	Dsim\GD14957	Scf_3L	20795578	20837314	1	Dsec\GM22365	scaffold_11	1336940	1340502	1	rgn	Dmau_3L	20453584	20457094	+
NijB	3L	18892383	18893278	1	Dsim\GD14779	Scf_3L	18405392	18406370	1	Dsec\GM15001	scaffold_19	851117	851776	1	NijB	Dmau_3L	18097857	18098505	+
WDY	Y	2273422	2487777	1
CG12272	3L	16122002	16126052	1
CG4325	X	2042730	2043818	-1
CG9997	3R	28755484	28756979	-1	Dsim\GD18020	Scf_3R	23961395	23962455	-1	Dsec\GM12285	scaffold_4	3463626	3464618	-1	CG9997	Dmau_3R	23673077	23674060	+
CG4757	3R	11161207	11163498	1
CG34057	3L	897380	898772	1	Dsim\GD27301	Scf_3L	853042	854512	1	Dsec\GM14364	scaffold_2	917133	918257	1	CG34057	Dmau_3L	836777	837959	+
CG10590	3L	5601096	5603979	-1
spn-D	3R	27165716	27167122	1	Dsim\GD21329	Scf_3R	22433388	22434777	1	Dsec\GM10376	scaffold_13	1746682	1747876	1	spn-D	Dmau_3R	22151004	22152191	+
Uch-L5	3L	9475493	9476965	-1	Dsim\GD12919	Scf_3L	9237790	9239167	-1	Dsec\GM24867	scaffold_0	1710008	1711061	-1	Uch-L5	Dmau_3L	9029281	9030334	+
knk	3R	10122365	10125664	-1	Dsim\GD20733	Scf_3R	15096945	15100578	1	Dsec\GM26184	scaffold_0	15963093	15965772	1	knk	Dmau_3R	14906336	14909012	+
CG7542	3L	17549826	17550980	1	Dsim\GD14718	Scf_3L	17133342	17134425	1	Dsec\GM25710	scaffold_0	9589903	9590715	1	CG7542	Dmau_3L	16834375	16835187	+
KCNQ	2R	10145897	10192394	-1	Dsim\GD26003	Scf_2R	6809410	6846763	-1	Dsec\GM20548	scaffold_1	3649603	3658384	-1	KCNQ	Dmau_2R	4505063	4513875	+
Smu1	3R	18978980	18981324	-1	Dsim\GD20141	Scf_3R	6450595	6452722	1	Dsec\GM13648	scaffold_166	15085	16862	1	Smu1	Dmau_3R	6333073	6334856	+
His2B:CG33884	2L	21497745	21498339	-1	Dsim\GD22305	Scf_NODE_42015	1449	1884	-1	Dsec\GM16910	scaffold_136	11939	12460	-1
CG13830	3R	23070516	23112730	-1
CG14856	3R	14798986	14801163	1	Dsim\GD18976	Scf_3R	10583398	10585682	-1	Dsec\GM24185	scaffold_0	11308285	11310148	-1	CG14856	Dmau_3R	10412707	10414574	+
S2P	2R	11842103	11844240	-1	Dsim\GD25883	Scf_2R	8434900	8436955	-1	Dsec\GM20407	scaffold_1	5281562	5283205	-1	S2P	Dmau_2R	6113468	6115112	+
Pu	2R	21175315	21182608	1	Dsim\GD11572	Scf_2R	17573128	17580237	1	Dsec\GM15814	scaffold_9	389497	395899	1	Pu	Dmau_2R	15098624	15101291	+
CG43123	2R	7402757	7403870	1	Dsim\GD10474	Scf_2R	4116035	4117120	1						CG43123	Dmau_2R	1853755	1854665	+
CG2202	X	10848757	10852327	1						Dsec\GM11438	scaffold_15	1446385	1449236	1	CG2202	Dmau_X	10017421	10020278	+
His3:CG33857	2L	21524952	21525480	1	Dsim\GD27984	Scf_X	8582172	8584991	-1	Dsec\GM18523	scaffold_5	3142340	3142840	1
CG18476	3R	11674920	11678116	-1	Dsim\GD20647	Scf_3R	13596086	13599287	1	Dsec\GM26084	scaffold_0	14461632	14464693	1	CG18476	Dmau_3R	13412703	13415764	+
CG17744	3L	7025801	7026794	-1	Dsim\GD13096	Scf_3L	6880456	6881476	-1	Dsec\GM13796	scaffold_2	6946313	6947083	-1	CG17744	Dmau_3L	6698156	6698926	+
CCAP	3R	22700582	22702084	-1	Dsim\GD18435	Scf_3R	18051194	18052844	-1	Dsec\GM23628	scaffold_0	18882748	18883490	-1	CCAP	Dmau_3R	17818612	17819357	+
CG5342	3R	11578826	11581476	1	Dsim\GD27781	Scf_3R	13693358	13696264	-1	Dsec\GM23955	scaffold_0	14557562	14560132	-1	CG5342	Dmau_3R	13508924	13511493	+
CG12213	3R	11964674	11967691	-1	Dsim\GD20619	Scf_3R	13314238	13316681	1	Dsec\GM26056	scaffold_0	14177293	14179215	1	CG12213	Dmau_3R	13132672	13134594	+
CG34176	2L	4004080	4004480	1
CG43187	2R	16380516	16385765	1	Dsim\GD11190	Scf_2R	12937382	12938748	1	Dsec\GM21694	scaffold_1	9765725	9766327	1	CG43187	Dmau_2R	10493186	10493788	+
Ent1	2L	355565	357874	-1	Dsim\GD22962	Scf_2L	332391	336712	-1	Dsec\GM16673	scaffold_14	345636	347406	-1	Ent1	Dmau_2L	332381	334154	+
jumu	3R	10350182	10361612	1	Dsim\GD18690	Scf_3R	14889150	14899379	-1	Dsec\GM23879	scaffold_0	15755937	15765322	-1	jumu	Dmau_3R	14698404	14707977	+
CG31029	3R	30129279	30132395	-1	Dsim\GD17333	Scf_3R	25300446	25303539	-1	Dsec\GM12180	scaffold_4	4807961	4810833	-1	CG31029	Dmau_3R	25005480	25008322	+
CG15771	X	5755574	5759751	1	Dsim\GD16749	Scf_X	5278103	5282162	1	Dsec\GM12434	scaffold_4	1111211	1113217	-1	CG15771	Dmau_X	5189564	5192418	+
veil	2R	17478158	17482118	1	Dsim\GD11274	Scf_2R	14024698	14028268	1	Dsec\GM21781	scaffold_1	10865128	10867241	1	veil	Dmau_2R	11561410	11563523	+
CG5863	3R	17411108	17412680	1	Dsim\GD19155	Scf_3R	8023327	8025094	-1	Dsec\GM15229	scaffold_12	909596	910783	-1	CG5863	Dmau_3R	7864638	7865825	+
CG16775	3L	17885948	17886645	-1	Dsim\GD12364	Scf_3L	17443060	17443651	-1	Dsec\GM24294	scaffold_0	9908469	9909044	-1	CG16775	Dmau_3L	17142106	17142681	+
CG32603	X	14184561	14185807	1	Dsim\GD28020	Scf_X	13278938	13280232	1	Dsec\GM17657	scaffold_20	683458	685235	1	CG32603	Dmau_X	13139919	13145436	+
CG4563	2R	24451084	24453040	-1	Dsim\GD24951	Scf_2R	20772534	20774476	-1	Dsec\GM11829	scaffold_23	211771	213579	-1	CG4563	Dmau_2R	18277979	18279786	+
att-ORFA	3R	20552385	20557667	-1
CG5525	2L	12690336	12692934	-1
Amy-d	2R	17124764	17126369	1						Dsec\Amy-p	scaffold_1	10516643	10518129	-1	Amy-d	Dmau_2R	11226138	11227513	+
phtf	2R	6741899	6746141	1
pita	2R	23548967	23554712	-1	Dsim\GD15202	Scf_2R	19902180	19908022	-1	Dsec\GM15530	scaffold_9	2717584	2722973	-1	pita	Dmau_2R	17411756	17417155	+
CD98hc	3R	7974409	7978428	-1	Dsim\GD19444	Scf_3R	3687598	3691548	-1	Dsec\GM10442	scaffold_6	3868845	3872197	-1	CD98hc	Dmau_3R	3590650	3593019	+
Ama	3R	6762593	6765261	1	Dsim\Ama	Scf_3R	2480201	2484535	1	Dsec\GM10913	scaffold_6	2680345	2681346	1	Ama	Dmau_3R	2418283	2419297	+
CG13857	3R	22392189	22394104	-1	Dsim\GD18464	Scf_3R	17743863	17755942	-1	Dsec\GM23656	scaffold_0	18574258	18575286	-1	CG13857	Dmau_3R	17515136	17516164	+
CG7668	3L	20002736	20004834	1	Dsim\GD14849	Scf_3L	19487152	19488914	1	Dsec\GM19744	scaffold_29	640935	643175	1	CG7668	Dmau_3L	19122896	19125144	+
CG18586	3L	5873311	5875466	1	Dsim\GD13904	Scf_3L	5777754	5779775	1						CG18586	Dmau_3L	5609203	5610944	+
CG11334	3R	31459822	31463037	-1	Dsim\GD16414	Scf_3R	26572263	26575443	-1	Dsec\GM12085	scaffold_4	6085614	6087527	-1	CG11334	Dmau_3R	26271879	26273804	+
CG13722	3L	4485159	4490963	-1	Dsim\GD13256	Scf_3L	4430657	4436297	-1	Dsec\GM13971	scaffold_2	4468199	4470743	-1	CG13722	Dmau_3L	4289693	4291697	+
bwa	2L	20066391	20073719	1	Dsim\GD24242	Scf_2L	19519098	19526567	1	Dsec\GM17388	scaffold_7	3677700	3683665	1	bwa	Dmau_2L	19234544	19241349	+
Rab1	3R	21266029	21269060	-1	Dsim\GD19996	Scf_3R	4212684	4215660	1	Dsec\GM15089	scaffold_38	34785	36544	1
Mid1	2R	24695378	24736657	-1	Dsim\GD24924	Scf_2R	21013835	21041729	-1	Dsec\GM11798	scaffold_23	453537	480584	-1	Mid1	Dmau_2R	18519237	18546014	+
MED26	4	778516	788978	-1	Dsim\GD17845	Scf_4	616217	622985	-1	Dsec\GM26770	scaffold_30	516171	522278	-1	MED26	Dmau_4	677599	683693	+
CG6750	2L	10731400	10732423	-1
fan	3L	8109132	8110043	1
CG7886	3R	14626676	14642563	-1	Dsim\GD20409	Scf_3R	10741903	10757822	1	Dsec\GM25838	scaffold_0	11581612	11584549	1	CG7886	Dmau_3R	10582992	10585932	+
SteXh:CG42398	211000000000000	1449	2180	1
CG7974	3L	1665138	1666594	1	Dsim\GD13638	Scf_3L	1574869	1576382	1	Dsec\GM14436	scaffold_2	1691674	1692669	1	CG7974	Dmau_3L	1551882	1552875	+
CG34117	3R	9399570	9400053	-1	Dsim\GD20802	Scf_3R	15800585	15801119	1	Dsec\GM26265	scaffold_0	16670000	16670305	1	CG34117	Dmau_3R	15611310	15611615	+
Osi11	3R	6267591	6268757	-1	Dsim\GD19553	Scf_3R	1993349	1994504	-1	Dsec\GM10562	scaffold_6	2179398	2180306	-1	Osi11	Dmau_3R	1937392	1938300	+
CG10589	3L	20927826	20929190	1	Dsim\GD14921	Scf_3L	20380261	20381614	1	Dsec\GM22332	scaffold_11	817906	819057	1	CG10589	Dmau_3L	20000236	20001396	+
Cks30A	2L	9330763	9331981	1	Dsim\GD23595	Scf_2L	9023672	9024420	1	Dsec\GM17424	scaffold_3	4789106	4789400	1	Cks30A	Dmau_2L	8971309	8971603	+
fs(1)K10	X	2242138	2246041	1	Dsim\GD16603	Scf_X	1973698	1977620	1	Dsec\GM19217	scaffold_10	1922302	1924587	1	fs(1)K10	Dmau_X	1946055	1948262	+
CG44158	3R	18208779	18209282	1	Dsim\GD19212	Scf_3R	7243494	7243938	-1						CG44158	Dmau_3R	7095623	7095903	+
CG7182	3L	8344421	8346382	-1	Dsim\GD12999	Scf_3L	8142099	8144072	-1	Dsec\GM24947	scaffold_0	634210	635751	-1	CG7182	Dmau_3L	7950041	7951582	+
beat-IIa	3R	17320004	17366119	-1	Dsim\GD20239	Scf_3R	8069773	8114709	1	Dsec\GM15371	scaffold_12	975603	1000625	1	beat-IIa	Dmau_3R	7929602	7954131	+
Sld5	3R	26055657	26056547	-1	Dsim\GD18149	Scf_3R	21378371	21379297	-1	Dsec\GM10199	scaffold_13	676021	676823	-1	Sld5	Dmau_3R	21099759	21100561	+
CG5196	3R	12408316	12411768	1	Dsim\GD18828	Scf_3R	12877471	12880772	-1	Dsec\GM15471	scaffold_6430	330	1457	-1	CG5196	Dmau_3R	12700779	12703820	+
CG32751	X	6196580	6198654	-1	Dsim\GD16207	Scf_X	5716672	5719039	-1	Dsec\GM12589	scaffold_4	672367	674449	1	CG32751	Dmau_X	5607531	5609420	+
ND-MWFE	2R	13158666	13160190	1	Dsim\GD29026	Scf_2R	9713781	9715329	1						ND-MWFE	Dmau_2R	7377876	7379045	+
Las	3L	20430605	20432361	-1
Debcl	2R	6648654	6652842	1
y	X	356509	361245	1	Dsim\y	Scf_X	178985	183216	1	Dsec\y	scaffold_10	113312	117263	1	y	Dmau_X	170406	174437	+
CG12963	2R	15555446	15562436	1	Dsim\GD11129	Scf_2R	12107949	12115120	1	Dsec\GM21627	scaffold_1	8934560	8940290	1	CG12963	Dmau_2R	9682194	9686685	+
CG9109	2L	6025870	6034423	-1	Dsim\GD22608	Scf_2L	5824942	5830062	-1	Dsec\GM17972	scaffold_5	4102227	4105198	-1	CG9109	Dmau_2L	5783413	5786466	+
CG9640	2R	17044743	17046768	1
CG8671	2L	21262956	21282790	1	Dsim\GD24314	Scf_2L	20666789	20685962	1	Dsec\GM23406	scaffold_18	1202615	1210908	1	CG8671	Dmau_2L	20290324	20298140	+
Cul4	2R	8102260	8106318	-1	Dsim\GD27026	Scf_2R	4813084	4816812	-1	Dsec\GM20725	scaffold_1	1634642	1637586	-1	Cul4	Dmau_2R	2525613	2528635	+
Ercc1	2R	14852941	14853948	1
CG30491	2R	7655072	7656770	1	Dsim\GD10497	Scf_2R	4383766	4385467	1	Dsec\GM20968	scaffold_1	1199921	1201201	1	CG30491	Dmau_2R	2098276	2099556	+
CG31414	3R	23704804	23708512	1
Fas2	X	4132887	4206093	-1	Dsim\Fas2	Scf_X	3713181	3799512	-1	Dsec\GM12701	scaffold_4	2633938	2693645	1	Fas2	Dmau_X	3668394	3688080	+
CG15896	X	6291303	6294177	1
CG33342	3R	24376865	24377705	1	Dsim\GD21098	Scf_3R	19735150	19736013	1	Dsec\GM26597	scaffold_0	20541336	20542176	1	CG33342	Dmau_3R	19459838	19460678	+
CG8500	3R	9784653	9789323	1	Dsim\GD28226	Scf_3R	15421008	15424416	-1	Dsec\GM23841	scaffold_0	16293433	16293977	-1	CG8500	Dmau_3R	15233552	15234502	+
CG16826	2L	13347773	13349020	1	Dsim\GD23888	Scf_2L	12926188	12927354	1	Dsec\GM10414	scaffold_16	1506303	1507292	1	CG16826	Dmau_2L	12838804	12839775	+
CG8485	2R	14235787	14239703	-1	Dsim\GD25693	Scf_2R	10826149	10830057	-1	Dsec\GM20221	scaffold_1	7631196	7634256	-1	CG8485	Dmau_2R	8413610	8416663	+
CG6903	X	4918730	4921648	1	Dsim\GD16714	Scf_X	4487689	4490616	1	Dsec\GM12376	scaffold_4	1928759	1931132	-1	CG6903	Dmau_X	4406442	4408815	+
l(3)04053	3L	22738602	22741388	-1	Dsim\GD12055	Scf_3L	22134597	22137262	-1	Dsec\GM22080	scaffold_11	2652992	2655071	-1	l(3)04053	Dmau_3L	21745468	21747539	+
CG12375	2L	8125668	8126890	-1	Dsim\GD22440	Scf_2L	7852877	7854103	-1	Dsec\GM13170	scaffold_3	3622228	3623106	-1	CG12375	Dmau_2L	7804708	7805586	+
Nrx-1	3R	22468512	22486969	1	Dsim\GD20957	Scf_3R	17817551	17835952	1	Dsec\GM26438	scaffold_0	18650630	18663885	1	Nrx-1	Dmau_3R	17590347	17603697	+
sel	2R	10050862	10052167	-1	Dsim\GD26011	Scf_2R	6713924	6715220	-1	Dsec\GM20558	scaffold_1	3551238	3552089	-1	sel	Dmau_2R	4410365	4411219	+
Atg9	2R	16294400	16297232	1	Dsim\Atg9	Scf_2R	12851525	12854363	1	Dsec\Atg9	scaffold_1	9681407	9683944	1	Atg9	Dmau_2R	10407891	10410455	+
Trax	3R	15361692	15362818	1	Dsim\GD19019	Scf_3R	10040435	10041572	-1	Dsec\GM24228	scaffold_0	10759437	10760384	-1	Trax	Dmau_3R	9872395	9873342	+
CG6340	X	15482374	15486612	1	Dsim\GD17213	Scf_X	14529461	14533682	1	Dsec\GM19575	scaffold_73	89690	114365	1	CG6340	Dmau_X	14349039	14352980	+
CG17575	2R	12845544	12846596	-1	Dsim\GD25810	Scf_2R	9421568	9422654	-1	Dsec\GM20333	scaffold_1	6260405	6261397	-1	CG17575	Dmau_2R	7088776	7089768	+
NetA	X	14604012	14653928	-1	Dsim\GD15846	Scf_X	13687642	13732381	-1	Dsec\GM17544	scaffold_20	1090387	1132804	-1	NetA	Dmau_X	13569398	13570511	+
CG5190	2R	18451284	18452736	1
Orc1	2R	7522437	7525716	-1	Dsim\GD10243	Scf_2R	4232920	4236258	-1	Dsec\GM20781	scaffold_1	1067090	1069992	-1	Orc1	Dmau_2R	1970444	1973346	+
BubR1	2R	5969099	5974385	-1	Dsim\GD10345	Scf_2R	2808906	2814387	-1	Dsec\GM16494	scaffold_26	501247	506506	-1	BubR1	Dmau_2R	684001	687485	+
CG31157	3R	13047731	13049294	1	Dsim\GD18879	Scf_3R	12290035	12291651	-1	Dsec\GM24083	scaffold_0	13121775	13123177	-1	CG31157	Dmau_3R	12115959	12117385	+
CG13008	X	16711303	16714372	1	Dsim\GD17296	Scf_X	15693587	15696735	1	Dsec\GM13460	scaffold_17	428185	430906	1	CG13008	Dmau_X	15492527	15495239	+
TwdlN	3R	26631869	26632956	1	Dsim\GD21293	Scf_3R	21917324	21918402	1	Dsec\GM10332	scaffold_13	1232455	1233297	1	TwdlN	Dmau_3R	21636653	21637582	+
CG34289	3R	23506908	23507476	-1	Dsim\GD18381	Scf_3R	18874971	18875604	-1	Dsec\GM23565	scaffold_0	19695561	19697423	-1	CG34289	Dmau_3R	18617561	18617975	+
CG32473	3R	13302648	13312785	1						Dsec\GM24100	scaffold_0	12866373	12868275	-1	CG32473	Dmau_3R	11860943	11864921	+
CG34393	2L	3175112	3200496	-1	Dsim\GD22769	Scf_2L	3048642	3073166	-1	Dsec\GM18158	scaffold_5	1340751	1345122	-1	CG34393	Dmau_2L	3024674	3042041	+
AMPKalpha	X	1375536	1378896	1	Dsim\GD16554	Scf_X	1148520	1151913	1	Dsec\GM19132	scaffold_10	1093369	1095609	1	AMPKalpha	Dmau_X	1134480	1136726	+
CG13359	X	801669	803470	-1	Dsim\GD16457	Scf_X	610016	611702	-1	Dsec\GM19020	scaffold_10	546485	547957	-1	CG13359	Dmau_X	599148	599936	+
dpr9	3R	15054930	15077206	-1	Dsim\GD20388	Scf_3R	10310734	10332856	1	Dsec\GM25811	scaffold_0	11043650	11058034	1	dpr9	Dmau_3R	10146492	10161025	+
Tctp	3R	11210247	11211898	1	Dsim\GD18736	Scf_3R	14055917	14056939	-1	Dsec\GM23923	scaffold_0	14922632	14923150	-1	Tctp	Dmau_3R	13867521	13868039	+
Hpr1	3R	5818794	5821440	-1	Dsim\GD19579	Scf_3R	1533437	1536077	-1	Dsec\GM10588	scaffold_6	1752776	1755145	-1	Hpr1	Dmau_3R	1514814	1517199	+
CG7587	3R	17594386	17595057	1	Dsim\GD19169	Scf_3R	7853536	7854983	-1	Dsec\GM15245	scaffold_12	739697	740325	-1	CG7587	Dmau_3R	7695629	7695921	+
Spase22-23	3R	24228342	24230035	-1	Dsim\GD18308	Scf_3R	19586780	19587507	-1	Dsec\GM23500	scaffold_0	20387485	20388024	-1	Spase22-23	Dmau_3R	19312054	19312593	+
LIMK1	X	12584385	12592193	-1	Dsim\GD15924	Scf_X	11823545	11830714	-1	Dsec\GM11544	scaffold_21	234847	239217	-1
nac	3R	8302686	8304023	-1	Dsim\GD20878	Scf_3R	16837069	16838404	1	Dsec\GM26356	scaffold_0	17699555	17700681	1	nac	Dmau_3R	16641173	16642299	+
CG14120	3L	12885039	12889244	1	Dsim\GD14412	Scf_3L	12577211	12581258	1	Dsec\GM25379	scaffold_0	5059542	5063591	1	CG14120	Dmau_3L	12340327	12344376	+
Ada	3R	9065183	9066303	1	Dsim\GD18595	Scf_3R	16121034	16122161	-1	Dsec\GM23784	scaffold_0	16988635	16989648	-1	Ada	Dmau_3R	15929417	15930430	+
CG32195	3L	18112959	18119150	1	Dsim\GD14745	Scf_3L	17661974	17663737	1	Dsec\GM14965	scaffold_19	103395	104739	1	CG32195	Dmau_3L	17359667	17361010	+
CG6332	3R	22014697	22016212	1	Dsim\GD20913	Scf_3R	17377851	17379374	1	Dsec\GM26392	scaffold_0	18210855	18212110	1	CG6332	Dmau_3R	17151099	17152353	+
CG7045	3R	22491829	22492381	1
He	2L	13972096	13972947	-1
CG12299	2L	10737345	10740762	1	Dsim\GD23730	Scf_2L	10413191	10416627	1	Dsec\GM18730	scaffold_3	6155544	6157742	1	CG12299	Dmau_2L	10332227	10334428	+
cnc	3R	23185580	23226711	-1	Dsim\fzo	Scf_3R	18551802	18586270	-1	Dsec\GM23585	scaffold_0	19376461	19377772	-1	cnc	Dmau_3R	18299805	18330939	+
CG5375	2L	10328200	10331116	-1
CG2767	3R	8005924	8008110	-1	Dsim\GD19441	Scf_3R	3718834	3721016	-1	Dsec\GM10439	scaffold_6	3899912	3901776	-1	CG2767	Dmau_3R	3621782	3623654	+
cbc	2R	13483512	13485391	-1	Dsim\GD25757	Scf_2R	10034493	10036267	-1	Dsec\GM20275	scaffold_1	6890574	6892051	-1	cbc	Dmau_2R	7697948	7699426	+
CG16782	X	3459016	3460240	-1	Dsim\GD16332	Scf_X	3100071	3101360	-1	Dsec\GM12727	scaffold_4	3308625	3309227	1	CG16782	Dmau_X	3067395	3067997	+
EF-G2	3R	22613686	22616622	1
CG11168	3R	24918106	24922385	1	Dsim\GD21146	Scf_3R	20259934	20264201	1	Dsec\GM17770	scaffold_33	3495	7037	1	CG11168	Dmau_3R	19992672	19996201	+
SPR	X	5446656	5494012	1	Dsim\GD16733	Scf_X	4987526	5030875	1	Dsec\GM12414	scaffold_4	1375435	1384047	-1	SPR	Dmau_X	4931330	4939876	+
msl-2	2L	3462218	3466112	-1	Dsim\GD15895	Scf_2L	3322881	3325734	-1	Dsec\GM11132	scaffold_129	25363	27742	-1	msl-2	Dmau_2L	3297739	3300126	+
Spase12	3R	29490544	29491150	-1	Dsim\GD17775	Scf_3R	24676194	24676804	-1	Dsec\GM12242	scaffold_4	4174774	4175180	-1	Spase12	Dmau_3R	24383383	24383789	+
CG7126	3R	18302170	18302849	-1	Dsim\GD20182	Scf_3R	7150429	7151297	1	Dsec\GM15304	scaffold_12	22127	22823	1	CG7126	Dmau_3R	7002503	7003180	+
CG9825	2R	22837361	22839291	1	Dsim\GD27920	Scf_2R	19203743	19205973	1	Dsec\GM15958	scaffold_9	2022791	2024623	1	CG9825	Dmau_2R	16720252	16722103	+
Pp4-19C	X	20421087	20424002	-1	Dsim\GD15536	Scf_X	19038093	19040708	-1	Dsec\GM22672	scaffold_8	2486353	2487346	-1	Pp4-19C	Dmau_X	18963780	18964767	+
CG4829	X	16811699	16826494	1	Dsim\GD17313	Scf_X	15795352	15810578	1	Dsec\GM13472	scaffold_17	544997	548422	1	CG4829	Dmau_X	15591865	15606066	+
S-Lap7	2R	13778124	13780245	-1	Dsim\GD14244	Scf_3L	10230010	10232071	1	Dsec\GM25212	scaffold_0	2694830	2696404	1	S-Lap7	Dmau_2R	7981899	7983482	+
His3:CG33830	2L	21479636	21480164	1	Dsim\GD27984	Scf_X	8582172	8584991	-1	Dsec\GM18523	scaffold_5	3142340	3142840	1
PpD3	3R	9747875	9751094	1	Dsim\GD18641	Scf_3R	15457676	15460678	-1	Dsec\GM23832	scaffold_0	16328938	16331062	-1	PpD3	Dmau_3R	15269699	15271826	+
Sxl	X	7074550	7098056	-1	Dsim\Sxl	Scf_X	6551829	6573063	-1	Dsec\Sxl	scaffold_24	198865	205922	-1	Sxl	Dmau_X	6426105	6439522	+
CG14420	X	2938856	2940527	1	Dsim\GD16626	Scf_X	2616968	2618670	1	Dsec\GM19256	scaffold_10	2574426	2575423	1	CG14420	Dmau_X	2587016	2588016	+
Aats-asn	2L	19129469	19131954	-1
for	2L	3622074	3656953	-1	Dsim\GD22740	Scf_2L	3480388	3510027	-1	Dsec\GM18132	scaffold_5	1723792	1741366	-1	for	Dmau_2L	3456336	3474048	+
26-29-p	3L	13994231	13996571	1	Dsim\GD14469	Scf_3L	13658519	13660928	1	Dsec\GM25442	scaffold_0	6134177	6136335	1	26-29-p	Dmau_3L	13403882	13406034	+
CG2246	3R	30592971	30601489	-1	Dsim\GD15073	Scf_3R	25738648	25747087	-1	Dsec\GM12142	scaffold_4	5245913	5253654	-1	CG2246	Dmau_3R	25439274	25447108	+
Msi	3L	17754936	17764158	-1
Jon65Aiv	3L	6039155	6040135	1	Dsim\GD13922	Scf_3L	5944591	5945584	1						Jon65Aiv	Dmau_3L	5778105	5778997	+
Doc2	3L	9012686	9019246	-1	Dsim\GD12943	Scf_3L	8790048	8796616	-1	Dsec\GM24895	scaffold_0	1276803	1282860	-1	Doc2	Dmau_3L	8592894	8598960	+
not	3L	18618305	18622129	-1	Dsim\GD12336	Scf_3L	18145157	18148855	-1	Dsec\GM14931	scaffold_19	593629	595212	-1	not	Dmau_3L	17839817	17842132	+
CG34136	2L	21096922	21098932	1	Dsim\GD24299	Scf_2L	20489403	20491478	1	Dsec\GM23390	scaffold_18	1016129	1017704	1	CG34136	Dmau_2L	20116356	20117930	+
CG6746	2L	12001234	12002266	-1	Dsim\GD22144	Scf_2L	11629996	11631025	-1	Dsec\GM26451	scaffold_16	196964	197701	-1	CG6746	Dmau_2L	11543601	11544338	+
Cyp9c1	2R	24631063	24632923	1	Dsim\GD11886	Scf_2R	20952780	20957662	1	Dsec\GM11888	scaffold_23	392032	393718	1	Cyp9c1	Dmau_2R	18458767	18460453	+
CG9932	2L	13021868	13060140	-1	Dsim\GD22090	Scf_2L	12603522	12641697	-1	Dsec\GM25899	scaffold_16	1182653	1187312	-1	CG9932	Dmau_2L	12518426	12526414	+
CG12118	X	9194750	9196414	-1	Dsim\GD16078	Scf_X	8623203	8624889	-1	Dsec\GM13671	scaffold_34	447684	448882	-1	CG12118	Dmau_X	8458287	8459503	+
CG40813	X	22143102	22143816	1	Dsim\GD15873	Scf_NODE_24415	49252	51445	1	Dsec\GM17585	scaffold_20	328404	331435	-1
CG4679	2R	13237256	13239468	-1	Dsim\GD25775	Scf_2R	9792066	9794365	-1	Dsec\GM20294	scaffold_1	6647542	6649554	-1	CG4679	Dmau_2R	7455860	7457872	+
santa-maria	2L	7445355	7451244	-1	Dsim\GD22494	Scf_2L	7199378	7205372	-1	Dsec\GM13558	scaffold_3	2962150	2964146	-1	santa-maria	Dmau_2L	7151682	7153709	+
CG12147	3R	5425369	5427257	-1	Dsim\GD27832	Scf_3R	1150658	1152276	-1	Dsec\GM10635	scaffold_6	1370502	1371939	-1	CG12147	Dmau_3R	1134063	1135499	+
CG6974	3R	15078530	15079285	-1	Dsim\GD20386	Scf_3R	10308006	10310311	1	Dsec\GM25810	scaffold_0	11030441	11031196	1	CG6974	Dmau_3R	10139008	10139763	+
sv	4	1088798	1113317	1	Dsim\GD24421	Scf_4	892728	921152	1	Dsec\GM13025	scaffold_40	157361	176977	1	sv	Dmau_4	950531	968986	+
ph-p	X	2126210	2138371	-1	Dsim\GD24614	Scf_X	1858895	1871169	-1	Dsec\GM18917	scaffold_10	1796285	1800324	-1	ph-p	Dmau_X	1836826	1840212	+
CG13284	2L	16842300	16848716	-1	Dsim\GD21891	Scf_2L	16377193	16378890	-1	Dsec\GM17152	scaffold_7	489076	492773	-1	CG13284	Dmau_2L	16143736	16147375	+
CG33337	3R	23590141	23592769	-1	Dsim\GD18370	Scf_3R	18969623	18972355	-1	Dsec\GM23555	scaffold_0	19774879	19779758	-1	CG33337	Dmau_3R	18697393	18700042	+
Unc-115b	3R	9687060	9692775	-1	Dsim\GD20771	Scf_3R	15503122	15513576	1	Dsec\GM26228	scaffold_0	16379522	16383881	1	Unc-115b	Dmau_3R	15320012	15324704	+
Ir68b	3L	12125487	12127394	-1	Dsim\GD12748	Scf_3L	11817215	11819297	-1	Dsec\GM24681	scaffold_0	4303390	4305315	-1	Ir68b	Dmau_3L	11584944	11586843	+
CG7201	3L	8290286	8295327	-1	Dsim\GD13005	Scf_3L	8087787	8092716	-1	Dsec\GM24954	scaffold_0	564514	565678	-1	CG7201	Dmau_3L	7896335	7897496	+
CG31266	3R	17132662	17133719	1	Dsim\GD19142	Scf_3R	8300601	8301690	-1	Dsec\GM15211	scaffold_12	1196317	1197230	-1	CG31266	Dmau_3R	8140406	8141319	+
Ppcdc	2R	21691295	21692764	1	Dsim\GD11620	Scf_2R	18088610	18089809	1	Dsec\GM15858	scaffold_9	905237	905942	1	Ppcdc	Dmau_2R	15609175	15609880	+
CG31533	3R	14154728	14157431	-1	Dsim\GD20447	Scf_3R	11202239	11204961	1	Dsec\GM25876	scaffold_0	12033442	12035976	1	CG31533	Dmau_3R	11031247	11033773	+
l(3)03670	3R	31052616	31053915	-1
CG16965	2L	11981591	11984380	1	Dsim\GD23801	Scf_2L	11614216	11617043	1	Dsec\GM26677	scaffold_16	181436	183774	1	CG16965	Dmau_2L	11527637	11530364	+
CG1316	3L	4283851	4286865	1	Dsim\GD13832	Scf_3L	4245705	4248192	1	Dsec\GM14647	scaffold_2	4283653	4285606	1	CG1316	Dmau_3L	4104616	4106567	+
CG34204	2R	21796395	21796941	1	Dsim\GD11629	Scf_2R	18185423	18185954	1	Dsec\GM15868	scaffold_9	1007286	1007606	1	CG34204	Dmau_2R	15707782	15708093	+
Mst98Cb	3R	28292798	28293863	1	Dsim\GD21369	Scf_3R	23496495	23497607	1	Dsec\GM16376	scaffold_22	722795	723601	1	Mst98Cb	Dmau_3R	23210935	23211750	+
dy	X	11769769	11778784	-1	Dsim\dy	Scf_X	11033885	11042816	-1	Dsec\GM13046	scaffold_36	340539	348609	-1	dy	Dmau_X	10854538	10860430	+
ABCB7	3L	1618414	1623413	1	Dsim\GD13631	Scf_3L	1528236	1532977	1	Dsec\GM14429	scaffold_2	1644789	1649270	1	ABCB7	Dmau_3L	1505278	1509736	+
CG9631	3R	14225098	14226762	-1
CG34268	3L	500965	501400	1
CG8012	3L	8215280	8216198	1	Dsim\GD14064	Scf_3L	8018247	8018733	1	Dsec\GM25031	scaffold_0	494632	494948	1	CG8012	Dmau_3L	7826471	7826787	+
CG42308	X	7011357	7012137	1	Dsim\GD16827	Scf_X	6494600	6495389	1	Dsec\GM17500	scaffold_24	133151	133336	1	CG42308	Dmau_X	6368837	6369022	+
Sid	3R	28670704	28672021	1	Dsim\GD21378	Scf_3R	23875909	23877288	1	Dsec\GM12732	scaffold_4	3378583	3379812	1	Sid	Dmau_3R	23587984	23589198	+
His2A:CG33853	2L	21518655	21519147	1	Dsim\GD24469	Scf_NODE_42015	2095	2436	1	Dsec\GM18786	scaffold_13851	561	935	1
CG15042	X	18526862	18528266	-1	Dsim\GD24474	Scf_X	17501743	17503374	-1	Dsec\GM22800	scaffold_8	726986	728305	-1	CG15042	Dmau_X	17266914	17267568	+
CG16704	2L	3692123	3692587	-1	Dsim\GD22738	Scf_2L	3545276	3545797	-1	Dsec\GM18131	scaffold_5	1787743	1788110	-1	CG16704	Dmau_2L	3520526	3520912	+
CG31697	2L	19535448	19536104	1	Dsim\GD26919	Scf_2L	19030296	19030968	1						CG31697	Dmau_2L	18748225	18748668	+
pnt	3R	23290231	23346167	-1	Dsim\pnt	Scf_3R	18658224	18713877	-1	Dsec\GM23574	scaffold_0	19502394	19504256	-1	pnt	Dmau_3R	18403509	18425465	+
Gyk	3L	202098	205844	-1
CG12869	2R	14591203	14595617	1	Dsim\GD11061	Scf_2R	11181600	11185063	1	Dsec\GM21556	scaffold_1	7997246	7999532	1	CG12869	Dmau_2R	8755001	8757287	+
Rca1	2L	6852315	6853866	1	Dsim\GD23434	Scf_2L	6626755	6628356	1	Dsec\GM16226	scaffold_3	2392592	2393821	1	Rca1	Dmau_2L	6582071	6583306	+
CG4198	X	5313258	5315190	1	Dsim\GD28439	Scf_X	4855713	4857724	1	Dsec\GM12399	scaffold_4	1543620	1545162	-1	CG4198	Dmau_X	4772077	4773632	+
CG7763	2R	11414510	11415462	1	Dsim\GD10797	Scf_2R	8009973	8014326	1	Dsec\GM21289	scaffold_1	4858501	4859073	1	CG7763	Dmau_2R	5690993	5691555	+
CG34355	3R	23803859	23859167	1	Dsim\GD21041	Scf_3R	19196631	19220687	1	Dsec\GM26533	scaffold_0	20005278	20023772	1	CG34355	Dmau_3R	18928333	18946729	+
nudC	3L	16804994	16819532	1	Dsim\GD14666	Scf_3L	16392145	16403170	1	Dsec\GM25659	scaffold_0	8872568	8883214	1	nudC	Dmau_3L	16122593	16133390	+
Dcr-2	2R	17574979	17581525	-1	Dsim\Dcr-2	Scf_2R	14110320	14116558	-1	Dsec\GM19969	scaffold_1	10962395	10968370	-1	Dcr-2	Dmau_2R	11651304	11657176	+
CG31740	2L	18008953	18009694	1	Dsim\GD27862	Scf_2L	17516298	17517070	1	Dsec\GM17258	scaffold_7	1644182	1644367	1	CG31740	Dmau_2L	17265994	17266179	+
dap	2R	9712321	9716256	1	Dsim\GD10678	Scf_2R	6385206	6388505	1	Dsec\GM21147	scaffold_1	3217752	3218647	1	dap	Dmau_2R	4084675	4086809	+
pros	3R	11328480	11407627	1	Dsim\pros	Scf_3R	13883509	13934393	-1	Dsec\GM23939	scaffold_0	14746014	14757088	-1	pros	Dmau_3R	13697561	13708832	+
DAT	2R	16558567	16565238	-1	Dsim\GD25533	Scf_2R	13118283	13124919	-1	Dsec\GM20052	scaffold_1	9944971	9949465	-1	DAT	Dmau_2R	10664815	10669366	+
CG8945	X	17080423	17087675	-1	Dsim\GD15704	Scf_X	16080402	16088045	-1	Dsec\GM13343	scaffold_17	807688	814761	-1	CG8945	Dmau_X	15858044	15865152	+
CG4747	2L	10003832	10008889	1	Dsim\GD23648	Scf_2L	9694423	9699302	1	Dsec\GM17855	scaffold_3	5443471	5447105	1	CG4747	Dmau_2L	9621410	9625104	+
Pex6	2R	10879974	10883202	1	Dsim\GD10761	Scf_2R	7507355	7510614	1	Dsec\GM21243	scaffold_1	4354230	4357099	1	Pex6	Dmau_2R	5194177	5197288	+
CG14354	3R	25815479	25816574	1	Dsim\GD21236	Scf_3R	21146582	21150381	1	Dsec\GM10266	scaffold_13	430103	431048	1	CG14354	Dmau_3R	20868055	20868999	+
Mo25	3L	16613218	16615472	-1	Dsim\GD12453	Scf_3L	16206662	16208942	-1	Dsec\GM24380	scaffold_0	8690435	8691455	-1	Mo25	Dmau_3L	15938548	15939567	+
dod	X	21345358	21346858	1	Dsim\GD17528	Scf_X	19937764	19938944	1	Dsec\GM23077	scaffold_8	3523787	3524830	1	dod	Dmau_X	19825420	19826457	+
CG16947	2L	6459015	6465669	-1
Mvl	3R	21051383	21060800	-1	Dsim\Mvl	Scf_3R	4416760	4426001	1	Dsec\GM15109	scaffold_38	241573	247825	1	Mvl	Dmau_3R	4313884	4320250	+
CG15708	2R	16240936	16241934	-1	Dsim\GD25556	Scf_2R	12798049	12799078	-1	Dsec\GM20075	scaffold_1	9628027	9628826	-1	CG15708	Dmau_2R	10354238	10355037	+
BRWD3	3R	24319000	24328619	1	Dsim\GD21089	Scf_3R	19676854	19686641	1	Dsec\GM26587	scaffold_0	20483381	20492481	1	BRWD3	Dmau_3R	19401932	19411018	+
CG13245	2L	16004325	16005461	1	Dsim\GD27216	Scf_2L	15542706	15543849	1	Dsec\GM18649	scaffold_5	4738697	4738939	1	CG13245	Dmau_2L	15327532	15327774	+
CG15209	X	10842205	10842995	1	Dsim\GD16989	Scf_X	10182081	10183091	1	Dsec\GM11436	scaffold_15	1439872	1440318	1	CG15209	Dmau_X	10010792	10011229	+
CG8543	3L	7469502	7470302	-1	Dsim\GD27035	Scf_3L	7327524	7328214	-1	Dsec\GM13755	scaffold_2	7393530	7394141	-1	CG8543	Dmau_3L	7137360	7137995	+
CG3678	3R	16990334	16991878	-1	Dsim\GD20260	Scf_3R	8439033	8440576	1	Dsec\GM22065	scaffold_1721	328	690	1	CG3678	Dmau_3R	8281139	8282319	+
CG15529	3R	30152059	30153699	1	Dsim\GD21505	Scf_3R	25322946	25324435	1	Dsec\GM12865	scaffold_4	4830607	4831453	1	CG15529	Dmau_3R	25028154	25028974	+
nbs	3L	9720414	9723194	-1	Dsim\GD12898	Scf_3L	9473076	9475853	-1	Dsec\GM24846	scaffold_0	1947223	1950144	-1	nbs	Dmau_3L	9262568	9265190	+
CG3209	2R	24068757	24073552	1	Dsim\GD11832	Scf_2R	20412211	20416965	1	Dsec\GM18300	scaffold_5	209988	214105	1	CG3209	Dmau_2R	17920182	17924289	+
CG32832	2L	16878326	16879290	-1	Dsim\GD21889	Scf_2L	16397610	16398560	-1	Dsec\GM17149	scaffold_7	515668	516296	-1	CG32832	Dmau_2L	16170483	16171117	+
cpb	2L	1704902	1706962	1	Dsim\GD23110	Scf_2L	1631601	1633459	1	Dsec\GM16827	scaffold_14	1639674	1640774	1	cpb	Dmau_2L	1621766	1622594	+
CG10984	3L	12750119	12753402	1	Dsim\GD14401	Scf_3L	12445237	12448401	1	Dsec\GM25369	scaffold_0	4928874	4931297	1	CG10984	Dmau_3L	12209911	12212455	+
Dlic	X	11154421	11164670	1	Dsim\GD29029	Scf_X	10486105	10496334	1	Dsec\GM11463	scaffold_15	1753058	1761993	1	Dlic	Dmau_X	10311197	10318822	+
Pgm	3L	16126018	16128531	-1	Dsim\GD27676	Scf_3L	15737609	15740109	-1	Dsec\GM24444	scaffold_0	8218818	8221247	-1	Pgm	Dmau_3L	15473564	15475844	+
CG13723	3L	17264416	17264986	1	Dsim\GD14696	Scf_3L	16831823	16832559	1	Dsec\GM25690	scaffold_0	9308565	9309563	1	CG13723	Dmau_3L	16557141	16557473	+
CkIIalpha-i1	3L	15816979	15818621	1	Dsim\GD14574	Scf_3L	15438109	15441980	1	Dsec\GM25559	scaffold_0	7918437	7919701	1	CkIIalpha-i1	Dmau_3L	15174879	15176158	+
RpS28-like	2L	9436804	9437227	1	Dsim\GD23606	Scf_2L	9126991	9127412	1	Dsec\GM17455	scaffold_3	4890870	4891100	1	RpS28-like	Dmau_2L	9074442	9074671	+
CG10041	3R	12350815	12352079	-1	Dsim\GD20582	Scf_3R	12934053	12935319	1	Dsec\GM26025	scaffold_0	13769850	13770951	1	CG10041	Dmau_3R	12755742	12756834	+
Ppt1	X	8688627	8690227	-1	Dsim\GD16099	Scf_X	8139160	8140821	-1	Dsec\GM21149	scaffold_35	427674	428881	-1	Ppt1	Dmau_X	7979730	7980938	+
CG3335	3L	9624237	9627321	1	Dsim\GD14198	Scf_3L	9375016	9378117	1	Dsec\GM25167	scaffold_0	1851523	1854445	1	CG3335	Dmau_3L	9166393	9169319	+
CG15905	2R	19646483	19647645	-1	Dsim\GD25312	Scf_2R	16135978	16137161	-1	Dsec\GM19820	scaffold_1	13046092	13049734	-1	CG15905	Dmau_2R	13660798	13661783	+
CG42662	2R	15698726	15701696	-1	Dsim\GD29106	Scf_2R	12251443	12252534	-1						CG42662	Dmau_2R	9822646	9822783	+
Efhc1.1	X	15780398	15783710	-1	Dsim\GD15778	Scf_X	14840308	14843465	-1	Dsec\GM22527	scaffold_37	258758	261654	-1	Efhc1.1	Dmau_X	14643937	14647107	+
CG14110	3L	13384789	13385925	1	Dsim\GD14447	Scf_3L	13079504	13080739	1	Dsec\GM25417	scaffold_0	5552603	5553701	1	CG14110	Dmau_3L	12829714	12830812	+
CG16833	2L	10989401	10997897	1
CG8136	3R	8721371	8723051	1	Dsim\GD18567	Scf_3R	16443430	16445199	-1	Dsec\GM23756	scaffold_0	17307881	17309267	-1	CG8136	Dmau_3R	16249865	16251251	+
Rich	3L	22257749	22262921	-1
CG14770	X	1369249	1370176	1	Dsim\GD16552	Scf_X	1140959	1143247	1	Dsec\GM19130	scaffold_10	1086922	1087580	1	CG14770	Dmau_X	1127941	1128650	+
Lnk	3R	25888542	25893270	1
Oscillin	2L	5547086	5549614	1	Dsim\GD23349	Scf_2L	5352162	5354626	1	Dsec\GM18555	scaffold_5	3626167	3627427	1	Oscillin	Dmau_2L	5310760	5312076	+
CG30497	2R	7737019	7782637	-1	Dsim\GD10222	Scf_2R	4467331	4509707	-1	Dsec\GM20759	scaffold_1	1283033	1321619	-1	CG30497	Dmau_2R	2181563	2183228	+
Vps20	2R	22608310	22609419	1	Dsim\GD11680	Scf_2R	18977340	18978303	1	Dsec\GM15925	scaffold_9	1794698	1795475	1	Vps20	Dmau_2R	16494190	16494967	+
mbt	X	16610685	16614856	1
CG6951	3L	20241267	20245312	1	Dsim\GD14864	Scf_3L	19717410	19721207	1	Dsec\GM22266	scaffold_11	141983	143006	1	CG6951	Dmau_3L	19349610	19350672	+
CG42255	3L	11801951	11814755	-1	Dsim\GD12774	Scf_3L	11496893	11509446	-1	Dsec\GM24707	scaffold_0	3990258	3993231	-1	CG42255	Dmau_3L	11269185	11281419	+
CG43218	3L	21258020	21258758	1	Dsim\GD27349	Scf_3L	20691144	20697414	1						CG43218	Dmau_3L	20310223	20310771	+
CG31300	3R	25283620	25285224	1	Dsim\GD21206	Scf_3R	20623268	20624920	1	Dsec\GM17835	scaffold_33	370543	371936	1	CG31300	Dmau_3R	20351128	20352527	+
Pdcd4	X	13745577	13755406	-1	Dsim\GD24516	Scf_X	12964231	12973702	-1	Dsec\GM17592	scaffold_20	283221	284126	-1	Pdcd4	Dmau_X	12751038	12756201	+
Rpn9	3R	23731375	23733462	-1
CG32368	3L	7915437	7915846	1	Dsim\GD14041	Scf_3L	7735125	7735623	1	Dsec\GM19392	scaffold_0	211890	212012	1	CG32368	Dmau_3L	7543710	7543976	+
CG32448	3L	21827774	21828480	-1	Dsim\GD12084	Scf_3L	21234884	21235442	-1	Dsec\GM22108	scaffold_11	1741820	1742143	-1	CG32448	Dmau_3L	20856023	20856346	+
sty	3L	3401153	3424935	-1	Dsim\GD27551	Scf_3L	3297949	3321309	-1	Dsec\GM14052	scaffold_2	3395773	3397539	-1	sty	Dmau_3L	3233069	3234829	+
GluRIIB	2L	5559342	5563502	1	Dsim\GD23353	Scf_2L	5364175	5368606	1	Dsec\GM18562	scaffold_5	3637726	3641820	1	GluRIIB	Dmau_2L	5322476	5326534	+
HtrA2	3R	14509049	14511712	-1	Dsim\GD20417	Scf_3R	10872384	10874200	1	Dsec\GM25850	scaffold_0	11704797	11706217	1	HtrA2	Dmau_3R	10700632	10702052	+
CG11034	2L	5805395	5809063	1	Dsim\GD23364	Scf_2L	5609124	5613425	1	Dsec\GM18574	scaffold_5	3884571	3887805	1	CG11034	Dmau_2L	5567444	5570748	+
Stim	X	15934495	15940451	-1	Dsim\GD15772	Scf_X	14985519	14991439	-1	Dsec\GM22508	scaffold_37	405250	409010	-1	Stim	Dmau_X	14794153	14797878	+
CG1287	3R	7500951	7502376	-1
l(3)72Dn	3L	16226126	16228737	-1	Dsim\GD12505	Scf_3L	15833713	15836317	-1	Dsec\GM24438	scaffold_0	8313592	8315980	-1	l(3)72Dn	Dmau_3L	15569319	15571710	+
CG13004	X	16826681	16835520	-1	Dsim\GD15719	Scf_X	15810740	15819308	-1	Dsec\GM13362	scaffold_17	549629	550315	-1	CG13004	Dmau_X	15607281	15608953	+
TrpA1	3L	8894404	8904790	-1	Dsim\GD12958	Scf_3L	8671489	8680957	-1	Dsec\GM24910	scaffold_0	1158437	1165327	-1	TrpA1	Dmau_3L	8474567	8483273	+
Lip3	3R	13370240	13371904	-1	Dsim\GD20506	Scf_3R	11980823	11982420	1	Dsec\GM25946	scaffold_0	12813473	12814868	1	Lip3	Dmau_3R	11806394	11807767	+
CG9458	3R	9818914	9819877	-1	Dsim\GD20751	Scf_3R	15388577	15389558	1	Dsec\GM26204	scaffold_0	16258999	16259721	1	CG9458	Dmau_3R	15200342	15201199	+
CG4278	2L	16327069	16328131	1	Dsim\GD24053	Scf_2L	15852647	15853835	1	Dsec\GM18668	scaffold_5	5051004	5051873	1	CG4278	Dmau_2L	15635446	15636334	+
CG15666	2R	21341972	21345608	1	Dsim\GD11591	Scf_2R	17738984	17742610	1	Dsec\GM15832	scaffold_9	560831	564388	1	CG15666	Dmau_2R	15260455	15264016	+
Alg10	3L	11164971	11166620	1	Dsim\GD14291	Scf_3L	10899769	10901418	1	Dsec\GM25257	scaffold_0	3381443	3382915	1	Alg10	Dmau_3L	10677491	10678960	+
Ser12	2L	2250431	2251275	-1	Dsim\GD22853	Scf_2L	2144001	2144827	-1						Ser12	Dmau_2L	2121907	2122638	+
Cpr72Eb	3L	16364899	16365707	1	Dsim\GD14634	Scf_3L	15972407	15973198	1	Dsec\GM25630	scaffold_0	8452847	8453497	1	Cpr72Eb	Dmau_3L	15707463	15708113	+
ena	2R	19141632	19163705	1	Dsim\GD11431	Scf_2R	15634620	15656669	1	Dsec\GM21935	scaffold_1	12555988	12562168	1	ena	Dmau_2R	13178736	13184869	+
CG8757	3L	13840197	13842240	-1	Dsim\GD17575	Scf_3L	13504869	13506986	-1	Dsec\GM24579	scaffold_0	5977567	5978483	-1	CG8757	Dmau_3L	13252299	13253225	+
TwdlQ	3R	26692546	26693590	-1	Dsim\GD18124	Scf_3R	21977840	21978876	-1	Dsec\GM10172	scaffold_13	1292475	1293368	-1	TwdlQ	Dmau_3R	21697106	21697832	+
CG43075	X	15220271	15221176	-1	Dsim\GD29185	Scf_X	14248400	14248902	-1	Dsec\GM13354	scaffold_17	624905	625560	-1	CG43075	Dmau_X	14100337	14100739	+
Ir64a	3L	5378786	5382821	-1	Dsim\GD13200	Scf_3L	5294674	5298784	-1	Dsec\GM13920	scaffold_2	5317532	5321520	-1	Ir64a	Dmau_3L	5128866	5132883	+
CG7406	X	19077720	19078592	1
CG12384	2R	11357902	11359176	-1	Dsim\GD15253	Scf_2R	7955337	7956596	-1	Dsec\GM20437	scaffold_1	4801979	4802838	-1	CG12384	Dmau_2R	5634840	5635730	+
MED25	3R	20008947	20011712	1	Dsim\GD19330	Scf_3R	5447341	5450104	-1	Dsec\GM17687	scaffold_58	110832	113402	-1	MED25	Dmau_3R	5338156	5340732	+
CG15459	X	20412341	20413581	-1						Dsec\GM22675	scaffold_8	2476809	2477872	-1	CG15459	Dmau_X	18954280	18954760	+
CG13476	3L	14705464	14706157	1	Dsim\GD14499	Scf_3L	14351290	14352028	1	Dsec\GM25476	scaffold_0	6823697	6824146	1	CG13476	Dmau_3L	14095917	14096366	+
CG11790	3R	25047706	25049455	1	Dsim\GD21162	Scf_3R	20384152	20385908	1	Dsec\GM17791	scaffold_33	135263	136916	1	CG11790	Dmau_3R	20116604	20118253	+
Mst77F	3L	20816901	20818027	-1	Dsim\GD12157	Scf_3L	20269902	20271070	-1	Dsec\GM22182	scaffold_11	709380	710088	-1	Mst77F	Dmau_3L	19892527	19893244	+
ncm	2L	18444507	18448957	-1	Dsim\GD21833	Scf_2L	17966385	17970836	-1	Dsec\GM17089	scaffold_7	2065954	2070195	-1	ncm	Dmau_2L	17687074	17691265	+
Int6	3L	16785242	16786941	-1
CG7367	2L	8026914	8039788	-1	Dsim\GD22446	Scf_2L	7754481	7756462	-1	Dsec\GM13206	scaffold_3	3524099	3525468	-1	CG7367	Dmau_2L	7706256	7707627	+
CG11656	3R	13009895	13011086	1	Dsim\GD18872	Scf_3R	12328201	12329386	-1	Dsec\GM24075	scaffold_0	13159772	13160699	-1	CG11656	Dmau_3R	12153814	12154748	+
Diap1	3L	16038410	16051034	-1	Dsim\GD12518	Scf_3L	15650840	15663384	-1	Dsec\GM24450	scaffold_0	8132386	8133693	-1	Diap1	Dmau_3L	15387305	15388268	+
CG15185	3R	6527508	6528674	1	Dsim\GD19879	Scf_3R	2249218	2250459	1	Dsec\GM10900	scaffold_6	2437842	2438843	1	CG15185	Dmau_3R	2185796	2186797	+
CG8248	2R	8918940	8920368	-1	Dsim\GD10127	Scf_2R	5615394	5616827	-1	Dsec\GM20653	scaffold_1	2444733	2445470	-1	CG8248	Dmau_2R	3322827	3323564	+
CG8326	X	17628164	17629492	-1	Dsim\GD17352	Scf_X	16623485	16624789	-1	Dsec\GM13306	scaffold_17	1365029	1366096	-1	CG8326	Dmau_X	16391909	16392976	+
CG42581	X	20096162	20096474	-1	Dsim\GD27112	Scf_NODE_19857	3578	3870	-1	Dsec\GM23007	scaffold_8	2256082	2259470	1
CG4892	2L	16133508	16134412	1
CG15096	2R	18808356	18815019	-1	Dsim\GD15218	Scf_2R	15299336	15307368	-1	Dsec\GM19872	scaffold_1	12204605	12210369	-1	CG15096	Dmau_2R	12833960	12839819	+
Mob2	3L	11522757	11562233	-1	Dsim\GD12801	Scf_3L	11236802	11275770	-1	Dsec\GM24744	scaffold_0	3715717	3719034	-1	Mob2	Dmau_3L	11014052	11032056	+
GABA-B-R3	2L	749945	762399	1	Dsim\GD23042	Scf_2L	713799	726331	1	Dsec\GM16760	scaffold_14	724855	732682	1	GABA-B-R3	Dmau_2L	712290	720099	+
Lint-1	X	11149323	11152592	1	Dsim\GD26805	Scf_X	10481063	10484425	1	Dsec\GM11462	scaffold_15	1747481	1750140	1	Lint-1	Dmau_X	10305764	10308425	+
Sema-2a	2R	16500178	16533459	1
Atet	2L	4333913	4345776	1	Dsim\GD23277	Scf_2L	4180578	4192347	1	Dsec\GM18463	scaffold_5	2434158	2441895	1	Atet	Dmau_2L	4156812	4164581	+
CG32232	3L	4993950	4996877	-1	Dsim\GD13219	Scf_3L	4933493	4936684	-1	Dsec\GM13937	scaffold_2	4973800	4976058	-1	CG32232	Dmau_3L	4787692	4790670	+
ATPCL	2R	15993531	16001290	-1	Dsim\GD25577	Scf_2R	12547000	12554506	-1	Dsec\GM20101	scaffold_1	9380638	9386434	-1	ATPCL	Dmau_2R	10110852	10116616	+
RpL31	2R	9587193	9587989	1	Dsim\GD10666	Scf_2R	6259761	6260601	1	Dsec\GM21136	scaffold_1	3089789	3090229	1
CG15358	2L	1882008	1883185	-1	Dsim\GD11996	Scf_2L	1797870	1798767	-1	Dsec\GM16582	scaffold_14	1830165	1831528	-1	CG15358	Dmau_2L	1776190	1776961	+
RabX2	X	10417429	10418219	1	Dsim\GD11278	Scf_X	10291193	10292039	-1	Dsec\GM11275	scaffold_15	1547533	1548180	-1
Vha36-3	X	2579091	2580560	-1	Dsim\GD27626	Scf_X	2285398	2286883	-1	Dsec\GM18874	scaffold_10	2246781	2252608	-1	Vha36-3	Dmau_X	2256838	2257769	+
Rrp4	2R	23555018	23556217	-1	Dsim\GD25033	Scf_2R	19908397	19909520	-1	Dsec\GM15529	scaffold_9	2723706	2724665	-1	Rrp4	Dmau_2R	17417895	17418854	+
Acsl	2R	8665813	8683022	1	Dsim\GD10588	Scf_2R	5364954	5381181	1	Dsec\GM21055	scaffold_1	2206862	2212958	1	Acsl	Dmau_2R	3085872	3090977	+
CG31872	2L	10639931	10643539	1	Dsim\GD23719	Scf_2L	10315376	10321565	1	Dsec\GM18636	scaffold_3	6066451	6067828	1	CG31872	Dmau_2L	10235344	10239994	+
CG7971	3L	1654247	1665064	-1	Dsim\GD13454	Scf_3L	1563945	1574785	-1	Dsec\GM14188	scaffold_2	1683628	1691184	-1	CG7971	Dmau_3L	1541117	1551391	+
CG8997	2L	13843915	13845325	-1
mew	X	13214409	13258490	-1	Dsim\GD15896	Scf_X	12440022	12482606	-1	Dsec\GM11503	scaffold_21	857032	896227	-1	mew	Dmau_X	12235419	12245103	+
[truncated: 11,375 more rows]
