# Supplementary material
Source: publisher figshare collection journal article supplement (https://gsajournals.figshare.com/articles/dataset/_/12935120)
Supplement: Supplementary file 1 [file 1]

| <b>Table S1: Primers for genes <i>ORY</i>, <i>kI3</i>, and <i>ftz</i></b> |                               |
|---------------------------------------------------------------------------|-------------------------------|
| Target Gene                                                               | Sequence                      |
| L_ORY                                                                     | aatacaactcaggagcgggacaat      |
| R_ORY                                                                     | tcgtaccattgcaatccgactag       |
| L_kI3                                                                     | gaacgcgcatccattttattct        |
| R_kI3                                                                     | tcgaaaagcccacgacaggtatt       |
| L_ftz                                                                     | accaaccccgtgaagaagctgaagtaca  |
| R_ftz                                                                     | cgtgtgtgatgcctacctgatgccaaagt |

**Table S1:** Primers for genes *ORY*, *kI3* (both on the Y chromosome) and *ftz* (control locus, on 3R) that were used for genotyping stage 5 embryos as male or female.
