# Supplementary material
Source: publisher figshare collection journal article supplement (https://gsajournals.figshare.com/articles/dataset/_/12935120)
Supplement: Supplementary file 3 [file 1]

| Table S6: Number of genes with each pattern of inheritance in hybrids |          |                     |                     |                     |               |              |           |
|-----------------------------------------------------------------------|----------|---------------------|---------------------|---------------------|---------------|--------------|-----------|
|                                                                       | Additive | <i>sim</i> dominant | <i>sec</i> dominant | <i>mau</i> dominant | Underdominant | Overdominant | Conserved |
| <i>(sim x mau) x sim</i>                                              | 88       | 735                 |                     | 182                 | 197           | 270          | 376       |
| <i>(mau x sim) x mau</i>                                              | 97       | 733                 |                     | 210                 | 168           | 260          | 412       |
| <i>(sec x mau) x sec</i>                                              | 237      |                     | 540                 | 292                 | 280           | 371          | 322       |
| <i>(mau x sec) x mau</i>                                              | 220      |                     | 489                 | 302                 | 329           | 382          | 313       |
| <i>(sim x sec) x sim</i>                                              | 180      | 450                 | 215                 |                     | 141           | 187          | 536       |
|                                                                       |          |                     |                     |                     |               |              |           |
| <i>sim x mau</i>                                                      | 51       | 68                  |                     | 20                  | 71            | 27           | 17        |
| <i>mau x sim</i>                                                      | 77       | 57                  |                     | 31                  | 40            | 40           | 11        |
| <i>sec x mau</i>                                                      | 70       |                     | 62                  | 30                  | 39            | 44           | 17        |
| <i>mau x sec</i>                                                      | 58       |                     | 69                  | 35                  | 34            | 49           | 19        |
| <i>sim x sec</i>                                                      | 49       | 59                  | 42                  |                     | 51            | 24           | 19        |

**Table S6:** Number of genes within each category of inheritance pattern in the hybrids. Stage 2 hybrids are shown in the first five rows and stage 5 hybrids are shown in the last five rows of the table.
